# Supplementary material
Source: publisher figshare collection journal article supplement (https://acs.figshare.com/ndownloader/files/4521358)
Supplement: Supplementary file 1 [file 4521358]

data_[L1Zn3(OAc)4]
  
_audit_creation_method            SHELXL-97 
_chemical_name_systematic 
; 
 ? 
; 
_chemical_name_common             ? 
_chemical_melting_point           ? 
_chemical_formula_moiety
 'C42 H66 N4 O10 Zn3, C7 H8'
_chemical_formula_sum 
 'C49 H74 N4 O10 Zn3' 
_chemical_formula_weight          1075.23 
  
loop_ 
 _atom_type_symbol 
 _atom_type_description 
 _atom_type_scat_dispersion_real 
 _atom_type_scat_dispersion_imag 
 _atom_type_scat_source 
 'C'  'C'   0.0033   0.0016 
 'International Tables Vol C Tables 4.2.6.8 and 6.1.1.4' 
 'H'  'H'   0.0000   0.0000 
 'International Tables Vol C Tables 4.2.6.8 and 6.1.1.4' 
 'N'  'N'   0.0061   0.0033 
 'International Tables Vol C Tables 4.2.6.8 and 6.1.1.4' 
 'O'  'O'   0.0106   0.0060 
 'International Tables Vol C Tables 4.2.6.8 and 6.1.1.4' 
 'Zn'  'Zn'   0.2839   1.4301 
 'International Tables Vol C Tables 4.2.6.8 and 6.1.1.4' 
  
_symmetry_cell_setting            Triclinic 
_symmetry_space_group_name_H-M    P-1 
  
loop_ 
 _symmetry_equiv_pos_as_xyz 
 'x, y, z' 
 '-x, -y, -z' 
  
_cell_length_a                  10.08917(16) 
_cell_length_b                  13.7070(3) 
_cell_length_c                  19.7768(3) 
_cell_angle_alpha               76.4901(16) 
_cell_angle_beta                78.5010(13) 
_cell_angle_gamma               80.1700(15) 
_cell_volume                    2583.71(8) 
_cell_formula_units_Z             2 
_cell_measurement_temperature     173(2) 
_cell_measurement_reflns_used     22049 
_cell_measurement_theta_min       3.8413 
_cell_measurement_theta_max       32.1741 
  
_exptl_crystal_description        blocks 
_exptl_crystal_colour             Colourless 
_exptl_crystal_size_max           0.38 
_exptl_crystal_size_mid           0.35 
_exptl_crystal_size_min           0.15 
_exptl_crystal_density_meas       ? 
_exptl_crystal_density_diffrn     1.382 
_exptl_crystal_density_method     'not measured' 
_exptl_crystal_F_000              1132 
_exptl_absorpt_coefficient_mu     1.439 
_exptl_absorpt_correction_type    multi-scan 
_exptl_absorpt_correction_T_min   0.84271 
_exptl_absorpt_correction_T_max   1.00000 
_exptl_absorpt_process_details     
; 
CrysAlis RED, Oxford Diffraction Ltd., 
Version 1.171.32.5 (release 08-05-2007 CrysAlis171 .NET) 
(compiled May  8 2007,13:10:02) 
Empirical absorption correction using spherical harmonics, 
implemented in SCALE3 ABSPACK scaling algorithm. 
; 
  
_exptl_special_details 
; 
 ? 
; 
  
_diffrn_ambient_temperature       173(2) 
_diffrn_radiation_wavelength      0.71073 
_diffrn_radiation_type            MoK\a 
_diffrn_radiation_source         'Enhance (Mo) X-ray Source'
_diffrn_radiation_monochromator   graphite 
_diffrn_measurement_device_type   'OD Xcalibur 3' 
_diffrn_measurement_method        'phi and omega scans' 
_diffrn_detector_area_resol_mean  15.9863 
_diffrn_standards_number          0 
_diffrn_standards_interval_count  ? 
_diffrn_standards_interval_time   ? 
_diffrn_standards_decay_%         ? 
_diffrn_reflns_number             35533 
_diffrn_reflns_av_R_equivalents   0.0275 
_diffrn_reflns_av_sigmaI/netI     0.0402 
_diffrn_reflns_limit_h_min        -14 
_diffrn_reflns_limit_h_max        15 
_diffrn_reflns_limit_k_min        -20 
_diffrn_reflns_limit_k_max        19 
_diffrn_reflns_limit_l_min        -26 
_diffrn_reflns_limit_l_max        29 
_diffrn_reflns_theta_min          3.85 
_diffrn_reflns_theta_max          32.28 
_reflns_number_total              15840 
_reflns_number_gt                 12201 
_reflns_threshold_expression      >2sigma(I) 
  
_computing_data_collection        'CrysAlis CCD, Oxford Diffraction Ltd' 
_computing_cell_refinement        'CrysAlis RED, Oxford Diffraction Ltd' 
_computing_data_reduction         'CrysAlis RED, Oxford Diffraction Ltd' 
_computing_structure_solution     'SHELXS-97 (Sheldrick, 1990)' 
_computing_structure_refinement   'SHELXL-97 (Sheldrick, 1997)' 
_computing_molecular_graphics     'Bruker SHELXTL' 
_computing_publication_material   'Bruker SHELXTL' 
  
_refine_special_details 
; 
 Refinement of F^2^ against ALL reflections.  The weighted R-factor wR and 
 goodness of fit S are based on F^2^, conventional R-factors R are based 
 on F, with F set to zero for negative F^2^. The threshold expression of 
 F^2^ > 2sigma(F^2^) is used only for calculating R-factors(gt) etc. and is 
 not relevant to the choice of reflections for refinement.  R-factors based 
 on F^2^ are statistically about twice as large as those based on F, and R- 
 factors based on ALL data will be even larger. 
; 
  
_refine_ls_structure_factor_coef  Fsqd 
_refine_ls_matrix_type            full 
_refine_ls_weighting_scheme       calc 
_refine_ls_weighting_details 
 'calc w=1/[\s^2^(Fo^2^)+(0.0597P)^2^+1.3557P] where P=(Fo^2^+2Fc^2^)/3' 
_atom_sites_solution_primary      direct 
_atom_sites_solution_secondary    difmap 
_atom_sites_solution_hydrogens    geom 
_refine_ls_hydrogen_treatment     mixed 
_refine_ls_extinction_method      none 
_refine_ls_extinction_coef        ? 
_refine_ls_number_reflns          15840 
_refine_ls_number_parameters      639 
_refine_ls_number_restraints      178 
_refine_ls_R_factor_all           0.0565 
_refine_ls_R_factor_gt            0.0388 
_refine_ls_wR_factor_ref          0.1173 
_refine_ls_wR_factor_gt           0.1002 
_refine_ls_goodness_of_fit_ref    1.084 
_refine_ls_restrained_S_all       1.085 
_refine_ls_shift/su_max           0.001 
_refine_ls_shift/su_mean          0.000 
  
loop_ 
 _atom_site_label 
 _atom_site_type_symbol 
 _atom_site_fract_x 
 _atom_site_fract_y 
 _atom_site_fract_z 
 _atom_site_U_iso_or_equiv 
 _atom_site_adp_type 
 _atom_site_occupancy 
 _atom_site_symmetry_multiplicity 
 _atom_site_calc_flag 
 _atom_site_refinement_flags 
 _atom_site_disorder_assembly 
 _atom_site_disorder_group 
Zn1 Zn 0.96674(2) 0.163650(17) 0.288994(11) 0.02065(6) Uani 1 1 d . . . 
Zn2 Zn 0.79411(2) 0.373470(17) 0.249708(12) 0.02143(6) Uani 1 1 d . . . 
Zn3 Zn 1.14862(3) 0.34250(2) 0.218170(13) 0.02755(6) Uani 1 1 d . . . 
O1 O 0.98527(14) 0.29970(10) 0.19706(7) 0.0205(3) Uani 1 1 d . . . 
C1 C 0.9848(2) 0.28443(15) 0.13123(10) 0.0211(3) Uani 1 1 d . . . 
C2 C 1.0485(2) 0.19484(16) 0.11068(10) 0.0251(4) Uani 1 1 d . . . 
C3 C 1.1439(2) 0.11991(16) 0.15387(10) 0.0276(4) Uani 1 1 d . . . 
H3A H 1.1937 0.0699 0.1258 0.033 Uiso 1 1 calc R . . 
H3B H 1.2120 0.1563 0.1640 0.033 Uiso 1 1 calc R . . 
N4 N 1.07254(18) 0.06605(13) 0.22079(9) 0.0232(3) Uani 1 1 d D . . 
H4 H 1.0007(16) 0.0436(18) 0.2115(13) 0.026(6) Uiso 1 1 d D . . 
C5 C 1.1646(2) -0.02015(16) 0.25402(11) 0.0273(4) Uani 1 1 d . . . 
H5A H 1.2327 0.0066 0.2721 0.033 Uiso 1 1 calc R . . 
H5B H 1.2146 -0.0578 0.2176 0.033 Uiso 1 1 calc R . . 
C6 C 1.0903(2) -0.09368(15) 0.31474(11) 0.0272(4) Uani 1 1 d . . . 
C7 C 1.0376(2) -0.04879(15) 0.38040(10) 0.0261(4) Uani 1 1 d . . . 
H7A H 1.0004 -0.1023 0.4191 0.031 Uiso 1 1 calc R . . 
H7B H 1.1158 -0.0289 0.3949 0.031 Uiso 1 1 calc R . . 
N8 N 0.93113(18) 0.04005(13) 0.37222(9) 0.0230(3) Uani 1 1 d D . . 
H8 H 0.8564(18) 0.015(2) 0.3690(16) 0.042(8) Uiso 1 1 d D . . 
C9 C 0.8940(2) 0.07708(16) 0.43916(10) 0.0256(4) Uani 1 1 d . . . 
H9A H 0.9702 0.1100 0.4447 0.031 Uiso 1 1 calc R . . 
H9B H 0.8830 0.0183 0.4789 0.031 Uiso 1 1 calc R . . 
C10 C 0.7656(2) 0.15077(16) 0.44374(10) 0.0232(4) Uani 1 1 d . . . 
C11 C 0.7542(2) 0.24608(15) 0.39799(10) 0.0213(3) Uani 1 1 d . . . 
O11 O 0.84782(14) 0.27110(10) 0.34008(7) 0.0209(3) Uani 1 1 d . . . 
C12 C 0.6439(2) 0.31794(16) 0.41772(10) 0.0247(4) Uani 1 1 d . . . 
C13 C 0.6365(2) 0.42688(16) 0.38062(11) 0.0286(4) Uani 1 1 d . . . 
H13A H 0.5606 0.4667 0.4066 0.034 Uiso 1 1 calc R . . 
H13B H 0.7222 0.4524 0.3813 0.034 Uiso 1 1 calc R . . 
N14 N 0.61543(19) 0.44310(13) 0.30656(9) 0.0266(4) Uani 1 1 d D . . 
H14 H 0.5482(19) 0.4073(18) 0.3070(15) 0.035(7) Uiso 1 1 d D . . 
C15 C 0.5731(3) 0.55172(17) 0.28028(13) 0.0351(5) Uani 1 1 d . . . 
H15A H 0.6429 0.5904 0.2862 0.042 Uiso 1 1 calc R . . 
H15B H 0.4866 0.5727 0.3100 0.042 Uiso 1 1 calc R . . 
C16 C 0.5527(2) 0.58098(18) 0.20323(12) 0.0340(5) Uani 1 1 d . . . 
C17 C 0.6887(2) 0.57120(16) 0.15318(12) 0.0295(4) Uani 1 1 d . . . 
H17A H 0.6741 0.6059 0.1049 0.035 Uiso 1 1 calc R . . 
H17B H 0.7534 0.6067 0.1670 0.035 Uiso 1 1 calc R . . 
N18 N 0.75159(17) 0.46614(13) 0.15176(9) 0.0230(3) Uani 1 1 d D . . 
H18 H 0.6902(19) 0.4309(16) 0.1443(13) 0.027(6) Uiso 1 1 d D . . 
C19 C 0.8745(2) 0.46418(15) 0.09655(10) 0.0242(4) Uani 1 1 d . . . 
H19A H 0.9489 0.4880 0.1118 0.029 Uiso 1 1 calc R . . 
H19B H 0.8539 0.5110 0.0525 0.029 Uiso 1 1 calc R . . 
C20 C 0.9208(2) 0.35996(15) 0.08255(10) 0.0232(4) Uani 1 1 d . . . 
C21 C 0.9047(2) 0.33893(16) 0.01930(10) 0.0283(4) Uani 1 1 d . A . 
H21A H 0.8599 0.3903 -0.0129 0.034 Uiso 1 1 calc R . . 
C22 C 0.9521(3) 0.24512(17) 0.00183(11) 0.0339(5) Uani 1 1 d D . . 
C23 C 1.0294(3) 0.17591(17) 0.04725(11) 0.0322(5) Uani 1 1 d . A . 
H23A H 1.0704 0.1136 0.0345 0.039 Uiso 1 1 calc R . . 
C24 C 0.9426(7) 0.2176(4) -0.0675(2) 0.0316(11) Uani 0.575(6) 1 d PD A 1 
C25 C 1.0767(7) 0.1733(6) -0.1058(3) 0.086(3) Uani 0.575(6) 1 d PDU A 1 
H25A H 1.1524 0.1876 -0.0869 0.129 Uiso 0.575(6) 1 calc PR A 1 
H25B H 1.0855 0.2037 -0.1563 0.129 Uiso 0.575(6) 1 calc PR A 1 
H25C H 1.0788 0.0999 -0.0989 0.129 Uiso 0.575(6) 1 calc PR A 1 
C26 C 0.8832(9) 0.3071(4) -0.1176(3) 0.063(2) Uani 0.575(6) 1 d PDU A 1 
H26A H 0.9572 0.3405 -0.1495 0.095 Uiso 0.575(6) 1 calc PR A 1 
H26B H 0.8254 0.3549 -0.0907 0.095 Uiso 0.575(6) 1 calc PR A 1 
H26C H 0.8283 0.2842 -0.1450 0.095 Uiso 0.575(6) 1 calc PR A 1 
C27 C 0.8484(9) 0.1369(5) -0.0472(3) 0.082(3) Uani 0.575(6) 1 d PDU A 1 
H27A H 0.9026 0.0699 -0.0409 0.124 Uiso 0.575(6) 1 calc PR A 1 
H27B H 0.7943 0.1442 -0.0845 0.124 Uiso 0.575(6) 1 calc PR A 1 
H27C H 0.7872 0.1444 -0.0030 0.124 Uiso 0.575(6) 1 calc PR A 1 
C24' C 0.8965(7) 0.2237(6) -0.0609(4) 0.033(2) Uiso 0.425(6) 1 d PDU A 2 
C25' C 0.7423(7) 0.2442(6) -0.0556(5) 0.063(2) Uiso 0.425(6) 1 d PDU A 2 
H25D H 0.7038 0.2832 -0.0189 0.094 Uiso 0.425(6) 1 calc PR A 2 
H25E H 0.7046 0.1798 -0.0435 0.094 Uiso 0.425(6) 1 calc PR A 2 
H25F H 0.7189 0.2828 -0.1009 0.094 Uiso 0.425(6) 1 calc PR A 2 
C26' C 0.9620(9) 0.2909(7) -0.1255(5) 0.061(2) Uiso 0.425(6) 1 d PDU A 2 
H26D H 1.0614 0.2778 -0.1285 0.091 Uiso 0.425(6) 1 calc PR A 2 
H26E H 0.9307 0.3618 -0.1229 0.091 Uiso 0.425(6) 1 calc PR A 2 
H26F H 0.9369 0.2770 -0.1674 0.091 Uiso 0.425(6) 1 calc PR A 2 
C27' C 0.9415(8) 0.1137(5) -0.0682(4) 0.0444(16) Uiso 0.425(6) 1 d PDU A 2 
H27D H 1.0410 0.0991 -0.0730 0.067 Uiso 0.425(6) 1 calc PR A 2 
H27E H 0.9123 0.1031 -0.1100 0.067 Uiso 0.425(6) 1 calc PR A 2 
H27F H 0.8998 0.0685 -0.0262 0.067 Uiso 0.425(6) 1 calc PR A 2 
C28 C 0.9763(3) -0.13008(19) 0.29083(13) 0.0373(5) Uani 1 1 d . . . 
H28A H 1.0133 -0.1583 0.2487 0.056 Uiso 1 1 calc R . . 
H28B H 0.9056 -0.0730 0.2798 0.056 Uiso 1 1 calc R . . 
H28C H 0.9366 -0.1823 0.3286 0.056 Uiso 1 1 calc R . . 
C29 C 1.1962(3) -0.18451(19) 0.33600(14) 0.0426(6) Uani 1 1 d . . . 
H29A H 1.2702 -0.1615 0.3512 0.064 Uiso 1 1 calc R . . 
H29B H 1.2335 -0.2164 0.2955 0.064 Uiso 1 1 calc R . . 
H29C H 1.1528 -0.2337 0.3748 0.064 Uiso 1 1 calc R . . 
C30 C 0.6620(2) 0.12537(16) 0.50031(10) 0.0257(4) Uani 1 1 d . . . 
H30A H 0.6705 0.0592 0.5288 0.031 Uiso 1 1 calc R . . 
C31 C 0.5471(2) 0.19237(17) 0.51679(10) 0.0263(4) Uani 1 1 d . . . 
C32 C 0.5432(2) 0.28978(17) 0.47508(11) 0.0281(4) Uani 1 1 d . . . 
H32A H 0.4686 0.3391 0.4863 0.034 Uiso 1 1 calc R . . 
C33 C 0.4284(2) 0.16255(19) 0.57582(11) 0.0317(5) Uani 1 1 d . . . 
C34 C 0.4564(3) 0.0553(2) 0.61741(15) 0.0526(8) Uani 1 1 d . . . 
H34A H 0.5362 0.0495 0.6401 0.079 Uiso 1 1 calc R . . 
H34B H 0.4743 0.0079 0.5855 0.079 Uiso 1 1 calc R . . 
H34C H 0.3769 0.0393 0.6535 0.079 Uiso 1 1 calc R . . 
C35 C 0.3978(3) 0.2354(3) 0.62613(14) 0.0471(7) Uani 1 1 d . . . 
H35A H 0.4774 0.2310 0.6486 0.071 Uiso 1 1 calc R . . 
H35B H 0.3193 0.2174 0.6624 0.071 Uiso 1 1 calc R . . 
H35C H 0.3771 0.3046 0.5998 0.071 Uiso 1 1 calc R . . 
C36 C 0.3028(3) 0.1686(3) 0.54148(15) 0.0494(7) Uani 1 1 d . . . 
H36A H 0.2254 0.1494 0.5781 0.074 Uiso 1 1 calc R . . 
H36B H 0.3225 0.1224 0.5086 0.074 Uiso 1 1 calc R . . 
H36C H 0.2804 0.2380 0.5158 0.074 Uiso 1 1 calc R . . 
C37 C 0.4518(3) 0.5199(2) 0.18894(16) 0.0462(6) Uani 1 1 d . . . 
H37A H 0.4877 0.4478 0.1981 0.069 Uiso 1 1 calc R . . 
H37B H 0.4387 0.5420 0.1396 0.069 Uiso 1 1 calc R . . 
H37C H 0.3642 0.5307 0.2199 0.069 Uiso 1 1 calc R . . 
C38 C 0.4963(3) 0.6941(2) 0.18958(17) 0.0562(8) Uani 1 1 d . . . 
H38A H 0.5609 0.7329 0.1992 0.084 Uiso 1 1 calc R . . 
H38B H 0.4086 0.7045 0.2206 0.084 Uiso 1 1 calc R . . 
H38C H 0.4834 0.7169 0.1403 0.084 Uiso 1 1 calc R . . 
O40 O 0.79590(15) 0.12803(11) 0.25379(8) 0.0273(3) Uani 1 1 d . . . 
C41 C 0.7000(2) 0.18625(16) 0.22835(11) 0.0275(4) Uani 1 1 d . . . 
O42 O 0.67435(16) 0.27913(11) 0.22695(8) 0.0288(3) Uani 1 1 d . . . 
C43 C 0.6121(4) 0.1403(2) 0.1940(2) 0.0606(9) Uani 1 1 d . . . 
H43A H 0.5312 0.1886 0.1842 0.091 Uiso 1 1 calc R . . 
H43B H 0.5838 0.0783 0.2258 0.091 Uiso 1 1 calc R . . 
H43C H 0.6643 0.1241 0.1497 0.091 Uiso 1 1 calc R . . 
O45 O 1.14836(15) 0.21737(12) 0.29645(8) 0.0276(3) Uani 1 1 d . . . 
C46 C 1.2305(2) 0.18845(18) 0.34250(11) 0.0294(4) Uani 1 1 d . . . 
O47 O 1.2214(2) 0.11385(16) 0.38904(11) 0.0506(5) Uani 1 1 d . . . 
C48 C 1.3406(3) 0.2541(2) 0.33452(14) 0.0418(6) Uani 1 1 d . . . 
H48A H 1.3998 0.2240 0.3697 0.063 Uiso 1 1 calc R . . 
H48B H 1.2987 0.3218 0.3415 0.063 Uiso 1 1 calc R . . 
H48C H 1.3948 0.2593 0.2871 0.063 Uiso 1 1 calc R . . 
O50 O 0.89819(16) 0.48752(12) 0.26237(9) 0.0313(3) Uani 1 1 d . . . 
C51 C 1.0050(2) 0.50537(16) 0.27689(11) 0.0275(4) Uani 1 1 d . . . 
O52 O 1.12180(18) 0.45492(14) 0.26532(10) 0.0372(4) Uani 1 1 d . . . 
C53 C 0.9956(3) 0.5938(2) 0.31120(15) 0.0437(6) Uani 1 1 d . . . 
H53A H 0.9330 0.6501 0.2899 0.065 Uiso 1 1 calc R . . 
H53B H 1.0862 0.6149 0.3043 0.065 Uiso 1 1 calc R . . 
H53C H 0.9615 0.5740 0.3618 0.065 Uiso 1 1 calc R . . 
O55 O 1.31959(18) 0.31166(14) 0.15609(9) 0.0387(4) Uani 1 1 d . . . 
C56 C 1.3138(2) 0.37893(17) 0.10070(11) 0.0293(4) Uani 1 1 d . . . 
O57 O 1.2195(3) 0.44549(18) 0.09303(14) 0.0630(6) Uani 1 1 d . . . 
C58 C 1.4362(4) 0.3696(3) 0.04220(17) 0.0710(11) Uani 1 1 d . . . 
H58A H 1.4319 0.4306 0.0047 0.107 Uiso 1 1 calc R . . 
H58B H 1.4348 0.3103 0.0228 0.107 Uiso 1 1 calc R . . 
H58C H 1.5206 0.3620 0.0614 0.107 Uiso 1 1 calc R . . 
C60 C 0.6509(13) -0.0790(11) 0.1160(6) 0.094(4) Uiso 0.344(6) 1 d PD B -1 
H60A H 0.7172 -0.0327 0.1126 0.140 Uiso 0.344(6) 1 calc PR B -1 
H60B H 0.6988 -0.1473 0.1152 0.140 Uiso 0.344(6) 1 calc PR B -1 
H60C H 0.5862 -0.0798 0.1601 0.140 Uiso 0.344(6) 1 calc PR B -1 
C61 C 0.5776(9) -0.0449(7) 0.0566(5) 0.062(3) Uiso 0.344(6) 1 d PGDU B -1 
C62 C 0.4923(10) 0.0466(7) 0.0487(6) 0.069(3) Uiso 0.344(6) 1 d PGDU B -1 
H62A H 0.4794 0.0871 0.0830 0.083 Uiso 0.344(6) 1 calc PR B -1 
C63 C 0.4261(11) 0.0789(7) -0.0094(6) 0.079(4) Uiso 0.344(6) 1 d PGDU B -1 
H63A H 0.3678 0.1414 -0.0149 0.095 Uiso 0.344(6) 1 calc PR B -1 
C64 C 0.4450(12) 0.0196(9) -0.0597(5) 0.080(4) Uiso 0.344(6) 1 d PGDU B -1 
H64A H 0.3998 0.0416 -0.0994 0.096 Uiso 0.344(6) 1 calc PR B -1 
C65 C 0.5303(12) -0.0720(8) -0.0518(6) 0.082(4) Uiso 0.344(6) 1 d PGDU B -1 
H65A H 0.5432 -0.1125 -0.0861 0.098 Uiso 0.344(6) 1 calc PR B -1 
C66 C 0.5965(10) -0.1042(7) 0.0064(6) 0.092(4) Uiso 0.344(6) 1 d PGDU B -1 
H66A H 0.6548 -0.1668 0.0118 0.111 Uiso 0.344(6) 1 calc PR B -1 
C60' C 0.477(3) 0.041(2) -0.1086(13) 0.112(12) Uiso 0.156(6) 1 d PDU B -2 
H60D H 0.3809 0.0710 -0.1071 0.168 Uiso 0.156(6) 1 calc PR B -2 
H60E H 0.4937 -0.0163 -0.1321 0.168 Uiso 0.156(6) 1 calc PR B -2 
H60F H 0.5357 0.0921 -0.1347 0.168 Uiso 0.156(6) 1 calc PR B -2 
C61' C 0.506(2) 0.0063(15) -0.0367(10) 0.092(6) Uiso 0.156(6) 1 d PGDU B -2 
C62' C 0.456(2) 0.0651(14) 0.0137(12) 0.084(6) Uiso 0.156(6) 1 d PGDU B -2 
H62B H 0.4018 0.1285 0.0017 0.101 Uiso 0.156(6) 1 calc PR B -2 
C63' C 0.485(3) 0.0312(18) 0.0817(11) 0.084(6) Uiso 0.156(6) 1 d PGDU B -2 
H63B H 0.4511 0.0714 0.1161 0.101 Uiso 0.156(6) 1 calc PR B -2 
C64' C 0.564(2) -0.0615(19) 0.0994(12) 0.102(8) Uiso 0.156(6) 1 d PGDU B -2 
H64B H 0.5843 -0.0847 0.1458 0.122 Uiso 0.156(6) 1 calc PR B -2 
C65' C 0.614(2) -0.1203(15) 0.0490(15) 0.112(8) Uiso 0.156(6) 1 d PGDU B -2 
H65B H 0.6682 -0.1837 0.0610 0.135 Uiso 0.156(6) 1 calc PR B -2 
C66' C 0.585(2) -0.0864(15) -0.0190(13) 0.100(7) Uiso 0.156(6) 1 d PGDU B -2 
H66B H 0.6189 -0.1266 -0.0535 0.120 Uiso 0.156(6) 1 calc PR B -2 
C70 C 1.004(2) 0.6533(11) 0.5360(10) 0.117(10) Uiso 0.288(10) 1 d PDU C -1 
H70A H 0.9486 0.7121 0.5119 0.176 Uiso 0.288(10) 1 calc PR C -1 
H70B H 1.1008 0.6608 0.5206 0.176 Uiso 0.288(10) 1 calc PR C -1 
H70C H 0.9804 0.6487 0.5871 0.176 Uiso 0.288(10) 1 calc PR C -1 
C71 C 0.9766(10) 0.5616(5) 0.5188(5) 0.054(3) Uiso 0.288(10) 1 d PGD C -1 
C72 C 0.8448(9) 0.5360(6) 0.5352(5) 0.051(3) Uiso 0.288(10) 1 d PGD C -1 
H72A H 0.7729 0.5784 0.5573 0.061 Uiso 0.288(10) 1 calc PR C -1 
C73 C 0.8180(9) 0.4485(7) 0.5193(5) 0.060(3) Uiso 0.288(10) 1 d PGD C -1 
H73A H 0.7279 0.4310 0.5305 0.072 Uiso 0.288(10) 1 calc PR C -1 
C74 C 0.9232(11) 0.3865(5) 0.4870(5) 0.062(4) Uiso 0.288(10) 1 d PGD C -1 
H74A H 0.9049 0.3267 0.4761 0.075 Uiso 0.288(10) 1 calc PR C -1 
C75 C 1.0551(10) 0.4121(6) 0.4705(5) 0.060(4) Uiso 0.288(10) 1 d PGD C -1 
H75A H 1.1269 0.3697 0.4484 0.072 Uiso 0.288(10) 1 calc PR C -1 
C76 C 1.0818(8) 0.4996(7) 0.4864(5) 0.047(3) Uiso 0.288(10) 1 d PGD C -1 
H76A H 1.1719 0.5171 0.4752 0.057 Uiso 0.288(10) 1 calc PR C -1 
C70' C 1.0096(15) 0.6632(9) 0.5350(7) 0.044(4) Uiso 0.212(10) 1 d PDU C -2 
H70D H 0.9213 0.7052 0.5316 0.066 Uiso 0.212(10) 1 calc PR C -2 
H70E H 1.0824 0.7002 0.5051 0.066 Uiso 0.212(10) 1 calc PR C -2 
H70F H 1.0246 0.6470 0.5841 0.066 Uiso 0.212(10) 1 calc PR C -2 
C71' C 1.0103(9) 0.5693(5) 0.5114(4) 0.035(3) Uiso 0.212(10) 1 d PGD C -2 
C72' C 0.8886(9) 0.5290(7) 0.5219(5) 0.047(4) Uiso 0.212(10) 1 d PGD C -2 
H72B H 0.8063 0.5630 0.5430 0.056 Uiso 0.212(10) 1 calc PR C -2 
C73' C 0.8873(12) 0.4389(7) 0.5013(6) 0.052(4) Uiso 0.212(10) 1 d PGD C -2 
H73B H 0.8042 0.4113 0.5085 0.062 Uiso 0.212(10) 1 calc PR C -2 
C74' C 1.0077(15) 0.3891(6) 0.4704(6) 0.058(5) Uiso 0.212(10) 1 d PGD C -2 
H74B H 1.0069 0.3275 0.4564 0.070 Uiso 0.212(10) 1 calc PR C -2 
C75' C 1.1294(12) 0.4294(8) 0.4600(6) 0.076(6) Uiso 0.212(10) 1 d PGD C -2 
H75B H 1.2117 0.3953 0.4388 0.091 Uiso 0.212(10) 1 calc PR C -2 
C76' C 1.1307(9) 0.5195(8) 0.4805(5) 0.040(3) Uiso 0.212(10) 1 d PGD C -2 
H76B H 1.2138 0.5470 0.4733 0.048 Uiso 0.212(10) 1 calc PR C -2 
  
loop_ 
 _atom_site_aniso_label 
 _atom_site_aniso_U_11 
 _atom_site_aniso_U_22 
 _atom_site_aniso_U_33 
 _atom_site_aniso_U_23 
 _atom_site_aniso_U_13 
 _atom_site_aniso_U_12 
Zn1 0.02208(11) 0.02068(11) 0.01820(10) -0.00398(8) -0.00265(8) -0.00092(8) 
Zn2 0.02165(11) 0.02102(11) 0.02119(11) -0.00422(8) -0.00373(8) -0.00160(8) 
Zn3 0.02325(12) 0.03111(13) 0.02946(13) -0.00378(10) -0.00703(9) -0.00706(9) 
O1 0.0215(6) 0.0232(6) 0.0179(6) -0.0059(5) -0.0041(5) -0.0027(5) 
C1 0.0218(9) 0.0238(9) 0.0176(8) -0.0042(7) -0.0020(7) -0.0040(7) 
C2 0.0317(10) 0.0240(9) 0.0178(8) -0.0043(7) -0.0025(7) -0.0010(8) 
C3 0.0321(10) 0.0253(10) 0.0204(9) -0.0042(7) -0.0009(8) 0.0047(8) 
N4 0.0241(8) 0.0240(8) 0.0186(7) -0.0026(6) -0.0025(6) 0.0008(6) 
C5 0.0286(10) 0.0250(10) 0.0227(9) -0.0019(7) -0.0003(8) 0.0034(8) 
C6 0.0347(11) 0.0205(9) 0.0209(9) -0.0029(7) 0.0013(8) 0.0021(8) 
C7 0.0326(10) 0.0219(9) 0.0203(9) -0.0033(7) -0.0036(8) 0.0033(8) 
N8 0.0269(8) 0.0215(8) 0.0200(7) -0.0060(6) -0.0034(6) 0.0004(6) 
C9 0.0284(10) 0.0274(10) 0.0176(8) -0.0032(7) -0.0032(7) 0.0024(8) 
C10 0.0234(9) 0.0262(9) 0.0192(8) -0.0059(7) -0.0019(7) -0.0014(7) 
C11 0.0219(9) 0.0246(9) 0.0187(8) -0.0058(7) -0.0037(7) -0.0045(7) 
O11 0.0199(6) 0.0226(6) 0.0198(6) -0.0043(5) -0.0020(5) -0.0032(5) 
C12 0.0257(9) 0.0259(9) 0.0213(9) -0.0067(7) -0.0011(7) -0.0007(8) 
C13 0.0359(11) 0.0236(9) 0.0242(9) -0.0077(8) 0.0005(8) -0.0009(8) 
N14 0.0285(9) 0.0225(8) 0.0264(8) -0.0047(7) -0.0029(7) 0.0004(7) 
C15 0.0399(13) 0.0234(10) 0.0358(11) -0.0067(9) -0.0007(10) 0.0074(9) 
C16 0.0340(11) 0.0280(11) 0.0328(11) -0.0011(9) -0.0049(9) 0.0078(9) 
C17 0.0327(11) 0.0219(9) 0.0307(10) -0.0029(8) -0.0048(8) 0.0015(8) 
N18 0.0224(8) 0.0205(8) 0.0259(8) -0.0046(6) -0.0047(6) -0.0015(6) 
C19 0.0283(10) 0.0205(9) 0.0214(8) -0.0023(7) -0.0021(7) -0.0015(7) 
C20 0.0263(9) 0.0235(9) 0.0202(8) -0.0031(7) -0.0046(7) -0.0055(7) 
C21 0.0394(12) 0.0267(10) 0.0193(9) -0.0022(7) -0.0096(8) -0.0035(9) 
C22 0.0568(15) 0.0266(10) 0.0196(9) -0.0016(8) -0.0136(9) -0.0050(10) 
C23 0.0518(14) 0.0245(10) 0.0189(9) -0.0055(7) -0.0060(9) 0.0002(9) 
C24 0.050(4) 0.032(2) 0.0155(17) -0.0055(14) -0.013(2) -0.003(2) 
C25 0.092(5) 0.132(7) 0.041(3) -0.051(4) -0.024(3) 0.025(5) 
C26 0.122(6) 0.045(3) 0.034(2) -0.004(2) -0.054(3) 0.000(3) 
C27 0.135(7) 0.078(4) 0.059(4) 0.004(3) -0.053(4) -0.065(5) 
C28 0.0540(15) 0.0307(11) 0.0301(11) -0.0105(9) -0.0014(10) -0.0140(11) 
C29 0.0518(15) 0.0275(11) 0.0353(12) -0.0019(9) 0.0038(11) 0.0121(11) 
C30 0.0279(10) 0.0284(10) 0.0195(8) -0.0035(7) -0.0024(7) -0.0041(8) 
C31 0.0253(9) 0.0327(11) 0.0208(9) -0.0066(8) -0.0003(7) -0.0060(8) 
C32 0.0252(10) 0.0324(11) 0.0243(9) -0.0082(8) -0.0002(8) 0.0010(8) 
C33 0.0259(10) 0.0438(13) 0.0226(9) -0.0061(9) 0.0041(8) -0.0078(9) 
C34 0.0434(15) 0.0571(18) 0.0406(14) 0.0092(13) 0.0106(12) -0.0081(13) 
C35 0.0423(14) 0.0654(19) 0.0346(12) -0.0225(13) 0.0096(11) -0.0120(13) 
C36 0.0343(13) 0.076(2) 0.0381(13) -0.0057(13) -0.0025(11) -0.0189(14) 
C37 0.0290(12) 0.0548(17) 0.0511(15) -0.0025(13) -0.0098(11) -0.0031(11) 
C38 0.0633(19) 0.0375(14) 0.0492(16) -0.0026(12) 0.0008(14) 0.0241(14) 
O40 0.0269(7) 0.0255(7) 0.0315(7) -0.0059(6) -0.0095(6) -0.0033(6) 
C41 0.0270(10) 0.0277(10) 0.0299(10) -0.0031(8) -0.0088(8) -0.0086(8) 
O42 0.0272(7) 0.0237(7) 0.0371(8) -0.0047(6) -0.0109(6) -0.0037(6) 
C43 0.067(2) 0.0429(16) 0.090(2) -0.0179(16) -0.0529(19) -0.0042(14) 
O45 0.0240(7) 0.0330(8) 0.0264(7) -0.0028(6) -0.0087(6) -0.0049(6) 
C46 0.0259(10) 0.0363(11) 0.0275(10) -0.0058(9) -0.0079(8) -0.0057(9) 
O47 0.0549(12) 0.0504(12) 0.0483(11) 0.0139(9) -0.0299(10) -0.0207(10) 
C48 0.0345(12) 0.0565(16) 0.0387(13) 0.0003(11) -0.0150(10) -0.0210(12) 
O50 0.0326(8) 0.0258(8) 0.0387(8) -0.0083(6) -0.0088(7) -0.0073(6) 
C51 0.0390(12) 0.0235(9) 0.0221(9) -0.0021(7) -0.0062(8) -0.0122(8) 
O52 0.0335(9) 0.0384(9) 0.0459(10) -0.0123(8) -0.0123(7) -0.0102(7) 
C53 0.0626(17) 0.0332(12) 0.0441(14) -0.0131(11) -0.0200(13) -0.0107(12) 
O55 0.0326(9) 0.0449(10) 0.0342(9) 0.0002(7) -0.0043(7) -0.0057(7) 
C56 0.0301(10) 0.0317(11) 0.0277(10) 0.0006(8) -0.0100(8) -0.0117(9) 
O57 0.0620(14) 0.0526(13) 0.0718(15) 0.0079(11) -0.0309(12) -0.0060(11) 
C58 0.087(3) 0.083(3) 0.0385(16) -0.0085(16) 0.0133(16) -0.031(2) 
  
_geom_special_details 
; 
 All esds (except the esd in the dihedral angle between two l.s. planes) 
 are estimated using the full covariance matrix.  The cell esds are taken 
 into account individually in the estimation of esds in distances, angles 
 and torsion angles; correlations between esds in cell parameters are only 
 used when they are defined by crystal symmetry.  An approximate (isotropic) 
 treatment of cell esds is used for estimating esds involving l.s. planes. 
; 
  
loop_ 
 _geom_bond_atom_site_label_1 
 _geom_bond_atom_site_label_2 
 _geom_bond_distance 
 _geom_bond_site_symmetry_2 
 _geom_bond_publ_flag 
Zn1 O11 2.0587(14) . ? 
Zn1 N8 2.0923(17) . ? 
Zn1 N4 2.1284(17) . ? 
Zn1 O45 2.1309(15) . ? 
Zn1 O40 2.1491(15) . ? 
Zn1 O1 2.2843(14) . ? 
Zn2 O42 2.0873(15) . ? 
Zn2 O11 2.1003(13) . ? 
Zn2 O50 2.1112(15) . ? 
Zn2 N14 2.1286(18) . ? 
Zn2 N18 2.1320(17) . ? 
Zn2 O1 2.2027(14) . ? 
Zn3 O52 1.9354(18) . ? 
Zn3 O55 1.9521(18) . ? 
Zn3 O1 1.9884(14) . ? 
Zn3 O45 2.0244(15) . ? 
O1 C1 1.367(2) . ? 
C1 C2 1.395(3) . ? 
C1 C20 1.403(3) . ? 
C2 C23 1.394(3) . ? 
C2 C3 1.513(3) . ? 
C3 N4 1.470(3) . ? 
N4 C5 1.482(3) . ? 
C5 C6 1.534(3) . ? 
C6 C28 1.523(3) . ? 
C6 C7 1.528(3) . ? 
C6 C29 1.533(3) . ? 
C7 N8 1.481(3) . ? 
N8 C9 1.484(3) . ? 
C9 C10 1.502(3) . ? 
C10 C30 1.394(3) . ? 
C10 C11 1.406(3) . ? 
C11 O11 1.348(2) . ? 
C11 C12 1.412(3) . ? 
C12 C32 1.392(3) . ? 
C12 C13 1.498(3) . ? 
C13 N14 1.482(3) . ? 
N14 C15 1.476(3) . ? 
C15 C16 1.528(3) . ? 
C16 C37 1.528(4) . ? 
C16 C17 1.529(3) . ? 
C16 C38 1.538(3) . ? 
C17 N18 1.475(3) . ? 
N18 C19 1.481(3) . ? 
C19 C20 1.497(3) . ? 
C20 C21 1.393(3) . ? 
C21 C22 1.390(3) . ? 
C22 C23 1.394(3) . ? 
C22 C24 1.529(4) . ? 
C22 C24' 1.562(8) . ? 
C24 C26 1.503(6) . ? 
C24 C27 1.513(7) . ? 
C24 C25 1.516(8) . ? 
C24' C26' 1.496(9) . ? 
C24' C25' 1.520(9) . ? 
C24' C27' 1.531(9) . ? 
C30 C31 1.385(3) . ? 
C31 C32 1.395(3) . ? 
C31 C33 1.533(3) . ? 
C33 C34 1.517(4) . ? 
C33 C35 1.523(4) . ? 
C33 C36 1.534(4) . ? 
O40 C41 1.253(3) . ? 
C41 O42 1.250(3) . ? 
C41 C43 1.508(3) . ? 
O45 C46 1.301(2) . ? 
C46 O47 1.208(3) . ? 
C46 C48 1.508(3) . ? 
O50 C51 1.245(3) . ? 
C51 O52 1.268(3) . ? 
C51 C53 1.503(3) . ? 
O55 C56 1.261(3) . ? 
C56 O57 1.207(3) . ? 
C56 C58 1.525(4) . ? 
C60 C61 1.455(12) . ? 
C61 C62 1.3900 . ? 
C61 C66 1.3900 . ? 
C62 C63 1.3900 . ? 
C63 C64 1.3900 . ? 
C64 C65 1.3900 . ? 
C65 C66 1.3900 . ? 
C60' C61' 1.462(13) . ? 
C61' C62' 1.3900 . ? 
C61' C66' 1.3900 . ? 
C62' C63' 1.3900 . ? 
C63' C64' 1.3900 . ? 
C64' C65' 1.3900 . ? 
C65' C66' 1.3900 . ? 
C70 C71 1.459(12) . ? 
C71 C72 1.3900 . ? 
C71 C76 1.3900 . ? 
C72 C73 1.3900 . ? 
C73 C74 1.3900 . ? 
C74 C75 1.3900 . ? 
C75 C76 1.3900 . ? 
C70' C71' 1.467(10) . ? 
C71' C72' 1.3900 . ? 
C71' C76' 1.3900 . ? 
C72' C73' 1.3900 . ? 
C73' C74' 1.3900 . ? 
C74' C75' 1.3900 . ? 
C75' C76' 1.3900 . ? 
  
loop_ 
 _geom_angle_atom_site_label_1 
 _geom_angle_atom_site_label_2 
 _geom_angle_atom_site_label_3 
 _geom_angle 
 _geom_angle_site_symmetry_1 
 _geom_angle_site_symmetry_3 
 _geom_angle_publ_flag 
O11 Zn1 N8 95.92(6) . . ? 
O11 Zn1 N4 169.89(6) . . ? 
N8 Zn1 N4 91.25(6) . . ? 
O11 Zn1 O45 91.27(6) . . ? 
N8 Zn1 O45 108.61(6) . . ? 
N4 Zn1 O45 93.18(7) . . ? 
O11 Zn1 O40 92.89(6) . . ? 
N8 Zn1 O40 84.88(6) . . ? 
N4 Zn1 O40 80.64(6) . . ? 
O45 Zn1 O40 165.40(6) . . ? 
O11 Zn1 O1 82.21(5) . . ? 
N8 Zn1 O1 174.77(6) . . ? 
N4 Zn1 O1 90.03(6) . . ? 
O45 Zn1 O1 76.37(5) . . ? 
O40 Zn1 O1 90.33(5) . . ? 
O42 Zn2 O11 94.53(6) . . ? 
O42 Zn2 O50 170.93(6) . . ? 
O11 Zn2 O50 94.04(6) . . ? 
O42 Zn2 N14 88.84(7) . . ? 
O11 Zn2 N14 93.56(6) . . ? 
O50 Zn2 N14 87.68(7) . . ? 
O42 Zn2 N18 83.07(6) . . ? 
O11 Zn2 N18 173.99(6) . . ? 
O50 Zn2 N18 88.68(6) . . ? 
N14 Zn2 N18 91.91(7) . . ? 
O42 Zn2 O1 93.40(6) . . ? 
O11 Zn2 O1 83.28(5) . . ? 
O50 Zn2 O1 90.54(6) . . ? 
N14 Zn2 O1 176.26(6) . . ? 
N18 Zn2 O1 91.34(6) . . ? 
O52 Zn3 O55 120.84(8) . . ? 
O52 Zn3 O1 118.16(6) . . ? 
O55 Zn3 O1 115.43(7) . . ? 
O52 Zn3 O45 105.10(7) . . ? 
O55 Zn3 O45 101.87(7) . . ? 
O1 Zn3 O45 85.82(6) . . ? 
C1 O1 Zn3 120.03(12) . . ? 
C1 O1 Zn2 116.62(11) . . ? 
Zn3 O1 Zn2 111.94(6) . . ? 
C1 O1 Zn1 117.51(11) . . ? 
Zn3 O1 Zn1 96.79(5) . . ? 
Zn2 O1 Zn1 87.86(5) . . ? 
O1 C1 C2 121.21(17) . . ? 
O1 C1 C20 120.12(17) . . ? 
C2 C1 C20 118.67(18) . . ? 
C23 C2 C1 119.42(19) . . ? 
C23 C2 C3 119.03(19) . . ? 
C1 C2 C3 121.47(18) . . ? 
N4 C3 C2 112.95(17) . . ? 
C3 N4 C5 110.80(16) . . ? 
C3 N4 Zn1 113.39(13) . . ? 
C5 N4 Zn1 114.65(12) . . ? 
N4 C5 C6 113.66(17) . . ? 
C28 C6 C7 111.49(19) . . ? 
C28 C6 C29 109.1(2) . . ? 
C7 C6 C29 106.08(18) . . ? 
C28 C6 C5 110.71(18) . . ? 
C7 C6 C5 112.48(18) . . ? 
C29 C6 C5 106.76(18) . . ? 
N8 C7 C6 115.45(16) . . ? 
C7 N8 C9 109.16(15) . . ? 
C7 N8 Zn1 119.29(13) . . ? 
C9 N8 Zn1 108.48(12) . . ? 
N8 C9 C10 114.25(16) . . ? 
C30 C10 C11 120.51(19) . . ? 
C30 C10 C9 117.00(18) . . ? 
C11 C10 C9 122.16(18) . . ? 
O11 C11 C10 122.32(17) . . ? 
O11 C11 C12 120.69(17) . . ? 
C10 C11 C12 116.87(18) . . ? 
C11 O11 Zn1 121.91(12) . . ? 
C11 O11 Zn2 121.51(12) . . ? 
Zn1 O11 Zn2 96.94(5) . . ? 
C32 C12 C11 120.27(19) . . ? 
C32 C12 C13 118.45(19) . . ? 
C11 C12 C13 121.17(18) . . ? 
N14 C13 C12 113.04(17) . . ? 
C15 N14 C13 109.30(17) . . ? 
C15 N14 Zn2 117.37(14) . . ? 
C13 N14 Zn2 107.41(13) . . ? 
N14 C15 C16 115.40(19) . . ? 
C37 C16 C15 111.5(2) . . ? 
C37 C16 C17 111.4(2) . . ? 
C15 C16 C17 111.34(19) . . ? 
C37 C16 C38 109.7(2) . . ? 
C15 C16 C38 106.4(2) . . ? 
C17 C16 C38 106.2(2) . . ? 
N18 C17 C16 114.66(18) . . ? 
C17 N18 C19 110.67(16) . . ? 
C17 N18 Zn2 116.50(13) . . ? 
C19 N18 Zn2 110.83(12) . . ? 
N18 C19 C20 111.48(16) . . ? 
C21 C20 C1 119.70(19) . . ? 
C21 C20 C19 119.53(18) . . ? 
C1 C20 C19 120.73(17) . . ? 
C22 C21 C20 122.07(19) . . ? 
C21 C22 C23 116.75(19) . . ? 
C21 C22 C24 125.0(3) . . ? 
C23 C22 C24 117.7(3) . . ? 
C21 C22 C24' 116.0(3) . . ? 
C23 C22 C24' 126.7(3) . . ? 
C24 C22 C24' 16.9(3) . . ? 
C22 C23 C2 122.4(2) . . ? 
C26 C24 C27 109.5(5) . . ? 
C26 C24 C25 108.3(5) . . ? 
C27 C24 C25 107.4(5) . . ? 
C26 C24 C22 111.6(4) . . ? 
C27 C24 C22 105.2(4) . . ? 
C25 C24 C22 114.6(4) . . ? 
C26' C24' C25' 109.8(7) . . ? 
C26' C24' C27' 108.3(6) . . ? 
C25' C24' C27' 107.9(6) . . ? 
C26' C24' C22 105.5(6) . . ? 
C25' C24' C22 114.8(6) . . ? 
C27' C24' C22 110.5(5) . . ? 
C31 C30 C10 122.91(19) . . ? 
C30 C31 C32 115.95(19) . . ? 
C30 C31 C33 123.0(2) . . ? 
C32 C31 C33 120.99(19) . . ? 
C12 C32 C31 122.9(2) . . ? 
C34 C33 C35 109.1(2) . . ? 
C34 C33 C31 112.6(2) . . ? 
C35 C33 C31 110.2(2) . . ? 
C34 C33 C36 107.9(2) . . ? 
C35 C33 C36 109.3(2) . . ? 
C31 C33 C36 107.74(19) . . ? 
C41 O40 Zn1 129.42(14) . . ? 
O42 C41 O40 125.56(19) . . ? 
O42 C41 C43 117.8(2) . . ? 
O40 C41 C43 116.6(2) . . ? 
C41 O42 Zn2 128.47(14) . . ? 
C46 O45 Zn3 127.19(14) . . ? 
C46 O45 Zn1 131.60(14) . . ? 
Zn3 O45 Zn1 100.74(6) . . ? 
O47 C46 O45 123.2(2) . . ? 
O47 C46 C48 121.0(2) . . ? 
O45 C46 C48 115.8(2) . . ? 
C51 O50 Zn2 144.91(15) . . ? 
O50 C51 O52 125.5(2) . . ? 
O50 C51 C53 117.7(2) . . ? 
O52 C51 C53 116.8(2) . . ? 
C51 O52 Zn3 120.82(14) . . ? 
C56 O55 Zn3 104.39(15) . . ? 
O57 C56 O55 123.9(2) . . ? 
O57 C56 C58 121.5(3) . . ? 
O55 C56 C58 114.6(2) . . ? 
O57 C56 Zn3 76.57(17) . . ? 
O55 C56 Zn3 47.29(12) . . ? 
C58 C56 Zn3 161.8(2) . . ? 
C62 C61 C66 120.0 . . ? 
C62 C61 C60 121.0(6) . . ? 
C66 C61 C60 119.0(6) . . ? 
C61 C62 C63 120.0 . . ? 
C64 C63 C62 120.0 . . ? 
C63 C64 C65 120.0 . . ? 
C66 C65 C64 120.0 . . ? 
C65 C66 C61 120.0 . . ? 
C62' C61' C66' 120.0 . . ? 
C62' C61' C60' 120.7(8) . . ? 
C66' C61' C60' 119.3(8) . . ? 
C61' C62' C63' 120.0 . . ? 
C62' C63' C64' 120.0 . . ? 
C65' C64' C63' 120.0 . . ? 
C64' C65' C66' 120.0 . . ? 
C65' C66' C61' 120.0 . . ? 
C72 C71 C76 120.0 . . ? 
C72 C71 C70 119.6(7) . . ? 
C76 C71 C70 120.4(7) . . ? 
C71 C72 C73 120.0 . . ? 
C72 C73 C74 120.0 . . ? 
C75 C74 C73 120.0 . . ? 
C74 C75 C76 120.0 . . ? 
C75 C76 C71 120.0 . . ? 
C72' C71' C76' 120.0 . . ? 
C72' C71' C70' 119.0(6) . . ? 
C76' C71' C70' 121.0(6) . . ? 
C71' C72' C73' 120.0 . . ? 
C74' C73' C72' 120.0 . . ? 
C75' C74' C73' 120.0 . . ? 
C74' C75' C76' 120.0 . . ? 
C75' C76' C71' 120.0 . . ? 
  
_diffrn_measured_fraction_theta_max    0.862 
_diffrn_reflns_theta_full              25.00 
_diffrn_measured_fraction_theta_full   0.971 
_refine_diff_density_max    1.002 
_refine_diff_density_min   -0.593 
_refine_diff_density_rms    0.087 
  
#===END

  
data_[L2Zn3(OAc)4]
  
_audit_creation_method            SHELXL-97 
_chemical_name_systematic 
; 
 ? 
; 
_chemical_name_common             ? 
_chemical_melting_point           ? 
_chemical_formula_moiety
 'C36 H54 N4 O10 Zn3, 1.75(C4 H8 O)'  
_chemical_formula_sum 
 'C43 H68 N4 O11.75 Zn3' 
_chemical_formula_weight          1025.12 
  
loop_ 
 _atom_type_symbol 
 _atom_type_description 
 _atom_type_scat_dispersion_real 
 _atom_type_scat_dispersion_imag 
 _atom_type_scat_source 
 'C'  'C'   0.0033   0.0016 
 'International Tables Vol C Tables 4.2.6.8 and 6.1.1.4' 
 'H'  'H'   0.0000   0.0000 
 'International Tables Vol C Tables 4.2.6.8 and 6.1.1.4' 
 'N'  'N'   0.0061   0.0033 
 'International Tables Vol C Tables 4.2.6.8 and 6.1.1.4' 
 'O'  'O'   0.0106   0.0060 
 'International Tables Vol C Tables 4.2.6.8 and 6.1.1.4' 
 'Zn'  'Zn'   0.2839   1.4301 
 'International Tables Vol C Tables 4.2.6.8 and 6.1.1.4' 
  
_symmetry_cell_setting            Monoclinic 
_symmetry_space_group_name_H-M    P2(1)/c 
  
loop_ 
 _symmetry_equiv_pos_as_xyz 
 'x, y, z' 
 '-x, y+1/2, -z+1/2' 
 '-x, -y, -z' 
 'x, -y-1/2, z-1/2' 
  
_cell_length_a                    24.2406(3) 
_cell_length_b                    16.3317(2) 
_cell_length_c                    29.4556(2) 
_cell_angle_alpha                 90.00 
_cell_angle_beta                  114.217(1) 
_cell_angle_gamma                 90.00 
_cell_volume                      10635.0(2) 
_cell_formula_units_Z             8 
_cell_measurement_temperature     173(2) 
_cell_measurement_reflns_used     48529 
_cell_measurement_theta_min       3.8394 
_cell_measurement_theta_max       31.7025 
  
_exptl_crystal_description        blocks 
_exptl_crystal_colour             Colourless 
_exptl_crystal_size_max           0.49 
_exptl_crystal_size_mid           0.40 
_exptl_crystal_size_min           0.16 
_exptl_crystal_density_meas       ? 
_exptl_crystal_density_diffrn     1.280 
_exptl_crystal_density_method     'not measured' 
_exptl_crystal_F_000              4304 
_exptl_absorpt_coefficient_mu     1.397 
_exptl_absorpt_correction_type    multi-scan 
_exptl_absorpt_correction_T_min   0.80684 
_exptl_absorpt_correction_T_max   1.00000 
_exptl_absorpt_process_details     
; 
CrysAlis RED, Oxford Diffraction Ltd., 
Version 1.171.32.5 (release 08-05-2007 CrysAlis171 .NET) 
(compiled May  8 2007,13:10:02) 
Empirical absorption correction using spherical harmonics, 
implemented in SCALE3 ABSPACK scaling algorithm. 
; 
  
_exptl_special_details 
; 
 ? 
; 
  
_diffrn_ambient_temperature       173(2) 
_diffrn_radiation_wavelength      0.71073 
_diffrn_radiation_type            MoK\a 
_diffrn_radiation_source         'Enhance (Mo) X-ray Source'
_diffrn_radiation_monochromator   graphite 
_diffrn_measurement_device_type   'OD Xcalibur 3' 
_diffrn_measurement_method        'phi and omega scans' 
_diffrn_detector_area_resol_mean  15.9863 
_diffrn_standards_number          0 
_diffrn_standards_interval_count  ? 
_diffrn_standards_interval_time   ? 
_diffrn_standards_decay_%         ? 
_diffrn_reflns_number             136789 
_diffrn_reflns_av_R_equivalents   0.0492 
_diffrn_reflns_av_sigmaI/netI     0.0832 
_diffrn_reflns_limit_h_min        -35 
_diffrn_reflns_limit_h_max        35 
_diffrn_reflns_limit_k_min        -23 
_diffrn_reflns_limit_k_max        23 
_diffrn_reflns_limit_l_min        -42 
_diffrn_reflns_limit_l_max        43 
_diffrn_reflns_theta_min          3.85 
_diffrn_reflns_theta_max          31.76 
_reflns_number_total              33259 
_reflns_number_gt                 18559 
_reflns_threshold_expression      >2sigma(I) 
  
_computing_data_collection        'CrysAlis CCD, Oxford Diffraction Ltd' 
_computing_cell_refinement        'CrysAlis RED, Oxford Diffraction Ltd' 
_computing_data_reduction         'CrysAlis RED, Oxford Diffraction Ltd' 
_computing_structure_solution     'SHELXS-97 (Sheldrick, 1990)' 
_computing_structure_refinement   'SHELXL-97 (Sheldrick, 1997)' 
_computing_molecular_graphics     'Bruker SHELXTL' 
_computing_publication_material   'Bruker SHELXTL' 
  
_refine_special_details 
; 
 Refinement of F^2^ against ALL reflections.  The weighted R-factor wR and 
 goodness of fit S are based on F^2^, conventional R-factors R are based 
 on F, with F set to zero for negative F^2^. The threshold expression of 
 F^2^ > 2sigma(F^2^) is used only for calculating R-factors(gt) etc. and is 
 not relevant to the choice of reflections for refinement.  R-factors based 
 on F^2^ are statistically about twice as large as those based on F, and R- 
 factors based on ALL data will be even larger. 
; 
  
_refine_ls_structure_factor_coef  Fsqd 
_refine_ls_matrix_type            full 
_refine_ls_weighting_scheme       calc 
_refine_ls_weighting_details 
 'calc w=1/[\s^2^(Fo^2^)+(0.1197P)^2^+0.0000P] where P=(Fo^2^+2Fc^2^)/3' 
_atom_sites_solution_primary      direct 
_atom_sites_solution_secondary    difmap 
_atom_sites_solution_hydrogens    geom 
_refine_ls_hydrogen_treatment     constr
_refine_ls_extinction_method      none 
_refine_ls_extinction_coef        ? 
_refine_ls_number_reflns          33259 
_refine_ls_number_parameters      1002 
_refine_ls_number_restraints      13 
_refine_ls_R_factor_all           0.1013 
_refine_ls_R_factor_gt            0.0610 
_refine_ls_wR_factor_ref          0.2331 
_refine_ls_wR_factor_gt           0.2054 
_refine_ls_goodness_of_fit_ref    1.163 
_refine_ls_restrained_S_all       1.162 
_refine_ls_shift/su_max           0.001 
_refine_ls_shift/su_mean          0.000 
  
loop_ 
 _atom_site_label 
 _atom_site_type_symbol 
 _atom_site_fract_x 
 _atom_site_fract_y 
 _atom_site_fract_z 
 _atom_site_U_iso_or_equiv 
 _atom_site_adp_type 
 _atom_site_occupancy 
 _atom_site_symmetry_multiplicity 
 _atom_site_calc_flag 
 _atom_site_refinement_flags 
 _atom_site_disorder_assembly 
 _atom_site_disorder_group 
Zn1 Zn 0.10717(2) 0.48345(3) 0.414055(16) 0.03207(11) Uani 1 1 d . . . 
Zn2 Zn 0.07938(2) 0.46952(3) 0.301015(16) 0.03100(11) Uani 1 1 d . . . 
Zn3 Zn 0.09005(3) 0.65424(6) 0.35785(3) 0.0314(2) Uani 0.860(4) 1 d P A 1 
Zn3A Zn 0.0886(2) 0.6799(4) 0.3431(2) 0.0371(12) Uiso 0.140(4) 1 d P A 2 
O1 O 0.13571(12) 0.55243(16) 0.36188(10) 0.0330(6) Uani 1 1 d . A . 
C1 C 0.19666(16) 0.5585(2) 0.37416(14) 0.0291(7) Uani 1 1 d . . . 
C2 C 0.23786(18) 0.5700(2) 0.42335(15) 0.0349(8) Uani 1 1 d . A . 
C3 C 0.21789(19) 0.5830(3) 0.46515(14) 0.0381(9) Uani 1 1 d . . . 
H3A H 0.2536 0.5977 0.4957 0.046 Uiso 1 1 calc R A . 
H3B H 0.1894 0.6298 0.4565 0.046 Uiso 1 1 calc R . . 
N4 N 0.18831(16) 0.5108(2) 0.47568(12) 0.0369(7) Uani 1 1 d . A . 
H4 H 0.2133 0.4681 0.4794 0.044 Uiso 1 1 calc R . . 
C5 C 0.1837(2) 0.5212(3) 0.52306(15) 0.0413(10) Uani 1 1 d . . . 
H5A H 0.1594 0.5707 0.5211 0.050 Uiso 1 1 calc R A . 
H5B H 0.2248 0.5306 0.5493 0.050 Uiso 1 1 calc R . . 
C6 C 0.1553(2) 0.4485(3) 0.53864(15) 0.0429(10) Uani 1 1 d . A . 
C7 C 0.0867(2) 0.4454(3) 0.50796(15) 0.0410(9) Uani 1 1 d . . . 
H7A H 0.0689 0.4060 0.5237 0.049 Uiso 1 1 calc R A . 
H7B H 0.0695 0.5000 0.5090 0.049 Uiso 1 1 calc R . . 
N8 N 0.06830(15) 0.4214(2) 0.45500(11) 0.0316(7) Uani 1 1 d . A . 
H8 H 0.0774 0.3680 0.4547 0.038 Uiso 1 1 calc R . . 
C9 C 0.00129(17) 0.4292(2) 0.42825(15) 0.0338(8) Uani 1 1 d . . . 
H9A H -0.0094 0.4878 0.4213 0.041 Uiso 1 1 calc R A . 
H9B H -0.0179 0.4087 0.4499 0.041 Uiso 1 1 calc R . . 
C10 C -0.02291(18) 0.3827(2) 0.38046(14) 0.0319(8) Uani 1 1 d . A . 
C11 C -0.00865(17) 0.4044(2) 0.34047(14) 0.0301(7) Uani 1 1 d . . . 
O11 O 0.03361(12) 0.46215(16) 0.34610(10) 0.0317(6) Uani 1 1 d . A . 
C12 C -0.04224(16) 0.3643(2) 0.29409(14) 0.0313(8) Uani 1 1 d . A . 
C13 C -0.03962(18) 0.3973(3) 0.24705(14) 0.0368(9) Uani 1 1 d . . . 
H13A H -0.0693 0.3668 0.2184 0.044 Uiso 1 1 calc R A . 
H13B H -0.0527 0.4553 0.2433 0.044 Uiso 1 1 calc R . . 
N14 N 0.01892(16) 0.39304(19) 0.24430(12) 0.0339(7) Uani 1 1 d . A . 
H14 H 0.0324 0.3413 0.2518 0.041 Uiso 1 1 calc R . . 
C15 C 0.01150(18) 0.4091(3) 0.19251(13) 0.0352(8) Uani 1 1 d . . . 
H15A H -0.0102 0.4617 0.1815 0.042 Uiso 1 1 calc R A . 
H15B H -0.0145 0.3656 0.1708 0.042 Uiso 1 1 calc R . . 
C16 C 0.0694(2) 0.4130(2) 0.18468(14) 0.0354(9) Uani 1 1 d . A . 
C17 C 0.10727(19) 0.4891(2) 0.20970(14) 0.0350(8) Uani 1 1 d . . . 
H17A H 0.1387 0.4962 0.1967 0.042 Uiso 1 1 calc R A . 
H17B H 0.0805 0.5376 0.1994 0.042 Uiso 1 1 calc R . . 
N18 N 0.13678(14) 0.48803(19) 0.26367(11) 0.0300(6) Uani 1 1 d . A . 
H18 H 0.1623 0.4451 0.2718 0.036 Uiso 1 1 calc R . . 
C19 C 0.17494(19) 0.5618(3) 0.28238(14) 0.0370(9) Uani 1 1 d . . . 
H19A H 0.1483 0.6099 0.2778 0.044 Uiso 1 1 calc R A . 
H19B H 0.1984 0.5708 0.2621 0.044 Uiso 1 1 calc R . . 
C20 C 0.21799(19) 0.5566(2) 0.33606(15) 0.0347(8) Uani 1 1 d . A . 
C21 C 0.2793(2) 0.5586(3) 0.34781(17) 0.0439(10) Uani 1 1 d . . . 
H21A H 0.2931 0.5561 0.3219 0.053 Uiso 1 1 calc R A . 
C22 C 0.32205(19) 0.5642(3) 0.39815(18) 0.0483(11) Uani 1 1 d . A . 
C23 C 0.2999(2) 0.5714(3) 0.43376(17) 0.0449(10) Uani 1 1 d . . . 
H23A H 0.3279 0.5777 0.4674 0.054 Uiso 1 1 calc R A . 
C24 C 0.3890(2) 0.5663(5) 0.4104(2) 0.0747(18) Uani 1 1 d . . . 
H24A H 0.4063 0.5117 0.4209 0.112 Uiso 1 1 calc R A . 
H24B H 0.4090 0.6055 0.4374 0.112 Uiso 1 1 calc R . . 
H24C H 0.3951 0.5830 0.3809 0.112 Uiso 1 1 calc R . . 
C25 C 0.1854(2) 0.3682(3) 0.53694(18) 0.0533(12) Uani 1 1 d . . . 
H25A H 0.1659 0.3237 0.5472 0.080 Uiso 1 1 calc R A . 
H25B H 0.2283 0.3708 0.5596 0.080 Uiso 1 1 calc R . . 
H25C H 0.1815 0.3582 0.5029 0.080 Uiso 1 1 calc R . . 
C26 C 0.1625(3) 0.4629(4) 0.59250(17) 0.0566(13) Uani 1 1 d . . . 
H26A H 0.1448 0.4168 0.6032 0.085 Uiso 1 1 calc R A . 
H26B H 0.1417 0.5136 0.5940 0.085 Uiso 1 1 calc R . . 
H26C H 0.2055 0.4675 0.6145 0.085 Uiso 1 1 calc R . . 
C27 C -0.06323(17) 0.3183(2) 0.37501(15) 0.0324(8) Uani 1 1 d . . . 
H27A H -0.0716 0.3041 0.4028 0.039 Uiso 1 1 calc R A . 
C28 C -0.09137(19) 0.2747(2) 0.33167(15) 0.0369(9) Uani 1 1 d . A . 
C29 C -0.08032(19) 0.3014(2) 0.29132(14) 0.0345(8) Uani 1 1 d . . . 
H29A H -0.1004 0.2744 0.2603 0.041 Uiso 1 1 calc R A . 
C30 C -0.1310(2) 0.2024(3) 0.32890(18) 0.0466(11) Uani 1 1 d . . . 
H30A H -0.1652 0.2012 0.2962 0.070 Uiso 1 1 calc R A . 
H30B H -0.1461 0.2070 0.3550 0.070 Uiso 1 1 calc R . . 
H30C H -0.1074 0.1518 0.3337 0.070 Uiso 1 1 calc R . . 
C31 C 0.1077(2) 0.3357(3) 0.20267(17) 0.0452(10) Uani 1 1 d . . . 
H31A H 0.1199 0.3294 0.2386 0.068 Uiso 1 1 calc R A . 
H31B H 0.1437 0.3401 0.1957 0.068 Uiso 1 1 calc R . . 
H31C H 0.0839 0.2879 0.1853 0.068 Uiso 1 1 calc R . . 
C32 C 0.0503(2) 0.4234(3) 0.12772(15) 0.0431(10) Uani 1 1 d . . . 
H32A H 0.0265 0.4737 0.1163 0.065 Uiso 1 1 calc R A . 
H32B H 0.0258 0.3763 0.1101 0.065 Uiso 1 1 calc R . . 
H32C H 0.0865 0.4267 0.1208 0.065 Uiso 1 1 calc R . . 
O40 O 0.15345(14) 0.37490(17) 0.41035(10) 0.0390(7) Uani 1 1 d . A . 
C41 C 0.15882(19) 0.3412(2) 0.37402(15) 0.0363(9) Uani 1 1 d . . . 
O42 O 0.13357(14) 0.36519(18) 0.32932(10) 0.0411(7) Uani 1 1 d . A . 
C43 C 0.1993(3) 0.2662(3) 0.3844(2) 0.0591(14) Uani 1 1 d . A . 
H43A H 0.2172 0.2548 0.4202 0.089 Uiso 1 1 calc R . . 
H43B H 0.2316 0.2765 0.3732 0.089 Uiso 1 1 calc R . . 
H43C H 0.1753 0.2190 0.3664 0.089 Uiso 1 1 calc R . . 
O45 O 0.07251(17) 0.6066(2) 0.41354(14) 0.0339(8) Uani 0.860(4) 1 d P A 1 
C46 C 0.0454(2) 0.6435(3) 0.43738(18) 0.0345(10) Uani 0.860(4) 1 d PU A 1 
O47 O 0.0558(2) 0.6343(3) 0.48095(15) 0.0610(12) Uani 0.860(4) 1 d P A 1 
C48 C -0.0023(3) 0.7061(4) 0.4063(2) 0.0531(14) Uani 0.860(4) 1 d P A 1 
H48A H -0.0238 0.7269 0.4257 0.080 Uiso 0.860(4) 1 calc PR A 1 
H48B H -0.0312 0.6798 0.3759 0.080 Uiso 0.860(4) 1 calc PR A 1 
H48C H 0.0176 0.7516 0.3973 0.080 Uiso 0.860(4) 1 calc PR A 1 
O50 O 0.02771(14) 0.57258(17) 0.25853(10) 0.0407(7) Uani 1 1 d D A . 
C51 C 0.0018(2) 0.6369(3) 0.26100(19) 0.0350(11) Uani 0.860(4) 1 d PD A 1 
O52 O 0.01578(16) 0.6804(2) 0.29980(12) 0.0381(8) Uani 0.860(4) 1 d PD A 1 
C53 C -0.0490(2) 0.6655(3) 0.2152(2) 0.0409(12) Uani 0.860(4) 1 d PD A 1 
H53A H -0.0699 0.6182 0.1950 0.061 Uiso 0.860(4) 1 calc PR A 1 
H53B H -0.0333 0.7002 0.1960 0.061 Uiso 0.860(4) 1 calc PR A 1 
H53C H -0.0774 0.6971 0.2242 0.061 Uiso 0.860(4) 1 calc PR A 1 
O45A O 0.0699(10) 0.5975(13) 0.4316(8) 0.025(5) Uiso 0.140(4) 1 d PD A 2 
C46A C 0.0293(12) 0.6539(13) 0.4097(9) 0.063(8) Uiso 0.140(4) 1 d PDU A 2 
O47A O 0.0243(12) 0.6969(16) 0.3702(10) 0.060(7) Uiso 0.140(4) 1 d PD A 2 
C48A C -0.0193(15) 0.678(2) 0.4262(14) 0.048(8) Uiso 0.140(4) 1 d PD A 2 
H48G H -0.0215 0.6375 0.4498 0.073 Uiso 0.140(4) 1 calc PR A 2 
H48H H -0.0582 0.6806 0.3972 0.073 Uiso 0.140(4) 1 calc PR A 2 
H48I H -0.0098 0.7319 0.4422 0.073 Uiso 0.140(4) 1 calc PR A 2 
C51A C 0.0109(11) 0.6444(11) 0.2478(9) 0.034(8) Uiso 0.140(4) 1 d PD A 2 
O52A O 0.0332(11) 0.6988(15) 0.2794(10) 0.051(6) Uiso 0.140(4) 1 d PD A 2 
C53A C -0.0366(13) 0.6694(18) 0.1968(10) 0.030(6) Uiso 0.140(4) 1 d PD A 2 
H53G H -0.0179 0.6726 0.1731 0.045 Uiso 0.140(4) 1 calc PR A 2 
H53H H -0.0534 0.7229 0.1993 0.045 Uiso 0.140(4) 1 calc PR A 2 
H53I H -0.0691 0.6286 0.1853 0.045 Uiso 0.140(4) 1 calc PR A 2 
O55 O 0.13085(18) 0.7586(2) 0.39354(12) 0.0594(9) Uani 1 1 d . . . 
C56 C 0.1581(2) 0.7762(3) 0.36592(17) 0.0448(10) Uani 1 1 d . A . 
O57 O 0.15297(17) 0.7319(2) 0.33073(13) 0.0593(9) Uani 1 1 d . . . 
C58 C 0.1977(3) 0.8520(4) 0.3779(2) 0.0741(18) Uani 1 1 d . . . 
H58A H 0.2112 0.8618 0.3512 0.111 Uiso 1 1 calc R A . 
H58B H 0.2330 0.8439 0.4094 0.111 Uiso 1 1 calc R . . 
H58C H 0.1745 0.8993 0.3808 0.111 Uiso 1 1 calc R . . 
Zn1' Zn 0.53698(2) 0.11230(3) 0.306582(17) 0.03112(11) Uani 1 1 d . . . 
Zn2' Zn 0.672558(18) 0.13245(2) 0.380975(15) 0.02682(10) Uani 1 1 d . . . 
Zn3' Zn 0.58685(2) 0.31820(3) 0.342286(17) 0.03196(11) Uani 1 1 d . . . 
O1' O 0.58857(11) 0.20457(15) 0.36935(9) 0.0280(5) Uani 1 1 d . . . 
C1' C 0.57201(17) 0.2044(2) 0.40836(15) 0.0312(8) Uani 1 1 d . . . 
C2' C 0.51024(17) 0.2005(2) 0.40030(16) 0.0351(8) Uani 1 1 d . . . 
C3' C 0.46170(19) 0.2056(2) 0.34918(18) 0.0419(10) Uani 1 1 d . . . 
H3'A H 0.4691 0.2544 0.3325 0.050 Uiso 1 1 calc R . . 
H3'B H 0.4225 0.2139 0.3516 0.050 Uiso 1 1 calc R . . 
N4' N 0.45657(14) 0.13243(19) 0.31741(13) 0.0362(8) Uani 1 1 d . . . 
H4' H 0.4536 0.0893 0.3353 0.043 Uiso 1 1 calc R . . 
C5' C 0.39952(18) 0.1336(3) 0.27245(19) 0.0462(11) Uani 1 1 d . . . 
H5'A H 0.3998 0.1813 0.2518 0.055 Uiso 1 1 calc R . . 
H5'B H 0.3655 0.1409 0.2825 0.055 Uiso 1 1 calc R . . 
C6' C 0.38867(18) 0.0567(2) 0.24124(18) 0.0438(11) Uani 1 1 d . . . 
C7' C 0.43169(18) 0.0507(2) 0.21362(16) 0.0413(10) Uani 1 1 d . . . 
H7'A H 0.4165 0.0069 0.1882 0.050 Uiso 1 1 calc R . . 
H7'B H 0.4296 0.1029 0.1959 0.050 Uiso 1 1 calc R . . 
N8' N 0.49507(14) 0.03366(19) 0.24564(12) 0.0333(7) Uani 1 1 d . . . 
H8' H 0.4972 -0.0175 0.2575 0.040 Uiso 1 1 calc R . . 
C9' C 0.52979(19) 0.0358(3) 0.21524(15) 0.0379(9) Uani 1 1 d . . . 
H9'A H 0.5311 0.0931 0.2047 0.045 Uiso 1 1 calc R . . 
H9'B H 0.5080 0.0031 0.1848 0.045 Uiso 1 1 calc R . . 
C10' C 0.59423(17) 0.0041(2) 0.24020(14) 0.0297(7) Uani 1 1 d . . . 
C11' C 0.63662(16) 0.0427(2) 0.28269(13) 0.0261(7) Uani 1 1 d . . . 
O11' O 0.62163(11) 0.10206(14) 0.30733(9) 0.0269(5) Uani 1 1 d . . . 
C12' C 0.69798(17) 0.0205(2) 0.29592(13) 0.0290(7) Uani 1 1 d . . . 
C13' C 0.74938(17) 0.0686(2) 0.33492(13) 0.0314(8) Uani 1 1 d . . . 
H13C H 0.7882 0.0458 0.3371 0.038 Uiso 1 1 calc R . . 
H13D H 0.7470 0.1260 0.3235 0.038 Uiso 1 1 calc R . . 
N14' N 0.75019(13) 0.06862(19) 0.38495(11) 0.0284(6) Uani 1 1 d . . . 
H14' H 0.7468 0.0164 0.3932 0.034 Uiso 1 1 calc R . . 
C15' C 0.80907(16) 0.0996(3) 0.42007(15) 0.0374(9) Uani 1 1 d . . . 
H15C H 0.8164 0.1529 0.4075 0.045 Uiso 1 1 calc R . . 
H15D H 0.8407 0.0612 0.4200 0.045 Uiso 1 1 calc R . . 
C16' C 0.81731(17) 0.1115(2) 0.47455(16) 0.0352(8) Uani 1 1 d . . . 
C17' C 0.77854(17) 0.1829(2) 0.47883(14) 0.0333(8) Uani 1 1 d . . . 
H17C H 0.7919 0.1969 0.5145 0.040 Uiso 1 1 calc R . . 
H17D H 0.7862 0.2312 0.4619 0.040 Uiso 1 1 calc R . . 
N18' N 0.71277(13) 0.16684(18) 0.45745(11) 0.0257(6) Uani 1 1 d . . . 
H18' H 0.7076 0.1238 0.4744 0.031 Uiso 1 1 calc R . . 
C19' C 0.67945(18) 0.2349(2) 0.46696(14) 0.0316(8) Uani 1 1 d . . . 
H19C H 0.6793 0.2817 0.4455 0.038 Uiso 1 1 calc R . . 
H19D H 0.7011 0.2525 0.5020 0.038 Uiso 1 1 calc R . . 
C20' C 0.61616(17) 0.2149(2) 0.45776(13) 0.0302(8) Uani 1 1 d . . . 
C21' C 0.5988(2) 0.2110(3) 0.49656(16) 0.0427(10) Uani 1 1 d . . . 
H21B H 0.6293 0.2155 0.5295 0.051 Uiso 1 1 calc R . . 
C22' C 0.5398(2) 0.2011(3) 0.49055(18) 0.0470(11) Uani 1 1 d . . . 
C23' C 0.4956(2) 0.1965(3) 0.44047(19) 0.0491(11) Uani 1 1 d . . . 
H23B H 0.4543 0.1904 0.4347 0.059 Uiso 1 1 calc R . . 
C24' C 0.5205(3) 0.1968(5) 0.5337(2) 0.084(2) Uani 1 1 d . . . 
H24D H 0.4764 0.2017 0.5209 0.127 Uiso 1 1 calc R . . 
H24E H 0.5394 0.2417 0.5570 0.127 Uiso 1 1 calc R . . 
H24F H 0.5332 0.1443 0.5510 0.127 Uiso 1 1 calc R . . 
C25' C 0.3897(2) -0.0190(3) 0.26973(19) 0.0492(11) Uani 1 1 d . . . 
H25D H 0.4299 -0.0257 0.2968 0.074 Uiso 1 1 calc R . . 
H25E H 0.3805 -0.0664 0.2475 0.074 Uiso 1 1 calc R . . 
H25F H 0.3594 -0.0146 0.2837 0.074 Uiso 1 1 calc R . . 
C26' C 0.3243(2) 0.0670(3) 0.1986(2) 0.0679(17) Uani 1 1 d . . . 
H26D H 0.2944 0.0715 0.2129 0.102 Uiso 1 1 calc R . . 
H26E H 0.3149 0.0194 0.1765 0.102 Uiso 1 1 calc R . . 
H26F H 0.3233 0.1167 0.1796 0.102 Uiso 1 1 calc R . . 
C27' C 0.6103(2) -0.0584(2) 0.21604(15) 0.0386(9) Uani 1 1 d . . . 
H27B H 0.5797 -0.0857 0.1889 0.046 Uiso 1 1 calc R . . 
C28' C 0.6703(2) -0.0815(3) 0.23099(17) 0.0401(9) Uani 1 1 d . . . 
C29' C 0.71278(18) -0.0406(2) 0.27114(15) 0.0342(8) Uani 1 1 d . . . 
H29B H 0.7541 -0.0555 0.2820 0.041 Uiso 1 1 calc R . . 
C30' C 0.6877(3) -0.1491(3) 0.2029(2) 0.0569(13) Uani 1 1 d . . . 
H30D H 0.6653 -0.1412 0.1669 0.085 Uiso 1 1 calc R . . 
H30E H 0.6776 -0.2028 0.2124 0.085 Uiso 1 1 calc R . . 
H30F H 0.7312 -0.1465 0.2115 0.085 Uiso 1 1 calc R . . 
C31' C 0.8038(2) 0.0329(3) 0.49635(16) 0.0456(11) Uani 1 1 d . . . 
H31D H 0.7615 0.0172 0.4773 0.068 Uiso 1 1 calc R . . 
H31E H 0.8110 0.0422 0.5312 0.068 Uiso 1 1 calc R . . 
H31F H 0.8304 -0.0111 0.4945 0.068 Uiso 1 1 calc R . . 
C32' C 0.88407(18) 0.1370(3) 0.50379(17) 0.0505(12) Uani 1 1 d . . . 
H32D H 0.8919 0.1459 0.5388 0.076 Uiso 1 1 calc R . . 
H32E H 0.8919 0.1878 0.4897 0.076 Uiso 1 1 calc R . . 
H32F H 0.9107 0.0936 0.5014 0.076 Uiso 1 1 calc R . . 
O40' O 0.54805(12) 0.01680(16) 0.35738(10) 0.0348(6) Uani 1 1 d . . . 
C41' C 0.59323(18) -0.0024(2) 0.39644(15) 0.0338(8) Uani 1 1 d . . . 
O42' O 0.64485(12) 0.02940(17) 0.41085(10) 0.0354(6) Uani 1 1 d . . . 
C43' C 0.5848(3) -0.0674(4) 0.4290(2) 0.0627(15) Uani 1 1 d . . . 
H43D H 0.5752 -0.0416 0.4549 0.094 Uiso 1 1 calc R . . 
H43E H 0.6221 -0.0993 0.4445 0.094 Uiso 1 1 calc R . . 
H43F H 0.5515 -0.1036 0.4088 0.094 Uiso 1 1 calc R . . 
O45' O 0.51101(15) 0.20915(17) 0.25281(12) 0.0501(8) Uani 1 1 d . . . 
C46' C 0.50819(18) 0.2825(2) 0.24241(14) 0.0349(8) Uani 1 1 d . . . 
O47' O 0.53415(14) 0.33918(16) 0.27208(11) 0.0440(8) Uani 1 1 d . . . 
C48' C 0.4702(2) 0.3072(3) 0.18893(19) 0.0592(14) Uani 1 1 d . . . 
H48D H 0.4594 0.2584 0.1678 0.089 Uiso 1 1 calc R . . 
H48E H 0.4934 0.3448 0.1775 0.089 Uiso 1 1 calc R . . 
H48F H 0.4333 0.3345 0.1870 0.089 Uiso 1 1 calc R . . 
O50' O 0.71261(13) 0.23722(16) 0.36539(10) 0.0365(6) Uani 1 1 d . . . 
C51' C 0.70825(18) 0.3106(2) 0.35293(15) 0.0347(8) Uani 1 1 d . . . 
O52' O 0.66318(14) 0.35536(19) 0.34344(13) 0.0495(8) Uani 1 1 d . . . 
C53' C 0.7613(2) 0.3472(3) 0.3473(3) 0.0646(16) Uani 1 1 d . . . 
H53D H 0.7981 0.3356 0.3772 0.097 Uiso 1 1 calc R . . 
H53E H 0.7557 0.4065 0.3430 0.097 Uiso 1 1 calc R . . 
H53F H 0.7650 0.3235 0.3181 0.097 Uiso 1 1 calc R . . 
O55' O 0.54124(15) 0.38008(18) 0.37115(11) 0.0455(7) Uani 1 1 d . . . 
C56' C 0.5678(3) 0.4067(3) 0.41568(17) 0.0541(13) Uani 1 1 d . . . 
O57' O 0.6224(2) 0.4122(2) 0.43864(14) 0.0711(12) Uani 1 1 d . . . 
C58' C 0.5227(4) 0.4253(5) 0.4394(3) 0.098(3) Uani 1 1 d . . . 
H58D H 0.4996 0.3758 0.4388 0.146 Uiso 1 1 calc R . . 
H58E H 0.4949 0.4688 0.4204 0.146 Uiso 1 1 calc R . . 
H58F H 0.5451 0.4433 0.4739 0.146 Uiso 1 1 calc R . . 
  
loop_ 
 _atom_site_aniso_label 
 _atom_site_aniso_U_11 
 _atom_site_aniso_U_22 
 _atom_site_aniso_U_33 
 _atom_site_aniso_U_23 
 _atom_site_aniso_U_13 
 _atom_site_aniso_U_12 
Zn1 0.0353(2) 0.0341(2) 0.0241(2) -0.00295(17) 0.00945(18) -0.00493(18) 
Zn2 0.0348(2) 0.0323(2) 0.0255(2) -0.00348(17) 0.01199(18) -0.00471(17) 
Zn3 0.0348(3) 0.0283(4) 0.0291(4) -0.0022(3) 0.0111(2) 0.0024(2) 
O1 0.0323(14) 0.0342(14) 0.0289(13) -0.0060(11) 0.0091(11) -0.0040(11) 
C1 0.0223(16) 0.0286(17) 0.0347(19) -0.0038(14) 0.0101(14) -0.0057(13) 
C2 0.038(2) 0.0275(18) 0.035(2) -0.0033(15) 0.0101(16) -0.0082(15) 
C3 0.038(2) 0.042(2) 0.0233(18) -0.0057(16) 0.0015(15) -0.0101(17) 
N4 0.0421(19) 0.0420(19) 0.0243(16) -0.0070(14) 0.0113(14) -0.0025(15) 
C5 0.044(2) 0.052(3) 0.0245(19) -0.0067(17) 0.0103(17) -0.0083(19) 
C6 0.053(3) 0.044(2) 0.0235(19) -0.0043(17) 0.0079(18) -0.0067(19) 
C7 0.049(2) 0.049(2) 0.0268(19) 0.0012(17) 0.0167(18) -0.004(2) 
N8 0.0385(18) 0.0301(16) 0.0253(15) -0.0003(12) 0.0121(13) 0.0009(13) 
C9 0.033(2) 0.036(2) 0.036(2) -0.0091(16) 0.0178(16) -0.0058(15) 
C10 0.036(2) 0.036(2) 0.0276(18) -0.0033(15) 0.0175(16) 0.0036(15) 
C11 0.0329(19) 0.0244(17) 0.0354(19) -0.0057(14) 0.0165(16) -0.0052(14) 
O11 0.0328(14) 0.0299(13) 0.0308(13) -0.0011(11) 0.0114(11) -0.0078(10) 
C12 0.0262(17) 0.0327(19) 0.0304(19) -0.0055(15) 0.0068(14) -0.0096(14) 
C13 0.033(2) 0.050(2) 0.0251(18) -0.0002(16) 0.0091(15) -0.0120(17) 
N14 0.047(2) 0.0257(15) 0.0275(16) -0.0003(12) 0.0133(14) -0.0065(13) 
C15 0.034(2) 0.045(2) 0.0205(17) 0.0005(15) 0.0045(15) -0.0058(17) 
C16 0.051(2) 0.0291(18) 0.0219(17) -0.0050(14) 0.0109(16) -0.0036(17) 
C17 0.041(2) 0.037(2) 0.0295(19) -0.0047(16) 0.0172(17) -0.0016(17) 
N18 0.0305(16) 0.0311(16) 0.0307(16) 0.0016(13) 0.0147(13) 0.0015(12) 
C19 0.040(2) 0.043(2) 0.031(2) 0.0014(16) 0.0168(17) -0.0074(17) 
C20 0.040(2) 0.0288(18) 0.039(2) -0.0014(16) 0.0192(17) -0.0048(16) 
C21 0.043(2) 0.048(3) 0.041(2) 0.0019(19) 0.0176(19) -0.0090(19) 
C22 0.0240(19) 0.068(3) 0.049(3) 0.002(2) 0.0110(18) -0.001(2) 
C23 0.036(2) 0.053(3) 0.038(2) 0.0004(19) 0.0075(18) -0.0080(19) 
C24 0.029(2) 0.132(6) 0.056(3) 0.006(3) 0.010(2) 0.006(3) 
C25 0.063(3) 0.044(3) 0.043(3) 0.007(2) 0.011(2) 0.001(2) 
C26 0.066(3) 0.066(3) 0.035(2) -0.001(2) 0.017(2) -0.012(3) 
C27 0.0305(19) 0.037(2) 0.036(2) 0.0006(16) 0.0193(16) -0.0032(15) 
C28 0.039(2) 0.034(2) 0.040(2) -0.0017(17) 0.0182(18) -0.0086(16) 
C29 0.039(2) 0.0332(19) 0.0284(19) -0.0034(15) 0.0108(16) -0.0049(16) 
C30 0.055(3) 0.041(2) 0.047(3) -0.0029(19) 0.024(2) -0.016(2) 
C31 0.055(3) 0.039(2) 0.037(2) 0.0002(18) 0.014(2) 0.008(2) 
C32 0.059(3) 0.046(2) 0.030(2) 0.0006(18) 0.025(2) 0.004(2) 
O40 0.0479(18) 0.0395(16) 0.0293(14) -0.0004(12) 0.0154(13) 0.0052(12) 
C41 0.039(2) 0.035(2) 0.033(2) -0.0021(16) 0.0134(17) 0.0027(17) 
O42 0.0513(18) 0.0399(16) 0.0292(14) 0.0040(12) 0.0134(13) 0.0078(13) 
C43 0.062(3) 0.061(3) 0.050(3) -0.001(2) 0.019(2) 0.026(3) 
O45 0.046(2) 0.0298(17) 0.0290(18) 0.0032(14) 0.0190(16) 0.0079(14) 
C46 0.037(2) 0.033(2) 0.032(2) -0.0064(18) 0.013(2) 0.0007(19) 
O47 0.083(3) 0.067(3) 0.047(2) 0.016(2) 0.041(2) 0.027(2) 
C48 0.056(4) 0.056(3) 0.055(3) 0.003(3) 0.031(3) 0.018(3) 
O50 0.0554(19) 0.0313(15) 0.0341(15) 0.0012(12) 0.0169(13) 0.0051(13) 
C51 0.036(2) 0.036(3) 0.039(3) 0.011(2) 0.021(2) -0.0083(19) 
O52 0.046(2) 0.0351(18) 0.0288(17) -0.0084(13) 0.0108(15) 0.0073(14) 
C53 0.036(3) 0.038(3) 0.043(3) -0.002(2) 0.010(2) 0.009(2) 
O55 0.075(3) 0.060(2) 0.0421(19) -0.0104(16) 0.0234(18) -0.0190(18) 
C56 0.046(3) 0.041(2) 0.041(2) 0.0019(19) 0.011(2) 0.0039(19) 
O57 0.072(2) 0.048(2) 0.051(2) -0.0070(16) 0.0191(18) 0.0053(17) 
C58 0.109(5) 0.068(4) 0.053(3) -0.009(3) 0.041(3) -0.022(3) 
Zn1' 0.0275(2) 0.0246(2) 0.0342(2) -0.00068(17) 0.00548(17) -0.00155(16) 
Zn2' 0.0247(2) 0.0255(2) 0.0264(2) -0.00033(16) 0.00663(16) -0.00156(15) 
Zn3' 0.0338(2) 0.0228(2) 0.0349(2) 0.00284(17) 0.00956(19) 0.00052(16) 
O1' 0.0308(13) 0.0231(12) 0.0304(13) -0.0023(10) 0.0128(11) -0.0010(10) 
C1' 0.0331(19) 0.0186(15) 0.043(2) 0.0013(14) 0.0167(17) -0.0020(14) 
C2' 0.0273(18) 0.0304(19) 0.047(2) -0.0002(17) 0.0153(17) 0.0004(14) 
C3' 0.031(2) 0.0275(19) 0.063(3) -0.0083(19) 0.0139(19) 0.0013(15) 
N4' 0.0267(16) 0.0234(15) 0.049(2) -0.0015(14) 0.0056(14) -0.0013(12) 
C5' 0.0232(19) 0.035(2) 0.063(3) -0.009(2) -0.0002(19) -0.0032(16) 
C6' 0.030(2) 0.0241(18) 0.061(3) -0.0155(18) 0.0023(19) -0.0026(15) 
C7' 0.030(2) 0.0253(18) 0.047(2) -0.0052(17) -0.0060(17) 0.0058(15) 
N8' 0.0316(17) 0.0236(15) 0.0376(17) -0.0016(13) 0.0071(14) -0.0013(12) 
C9' 0.041(2) 0.036(2) 0.031(2) -0.0044(16) 0.0085(17) -0.0036(17) 
C10' 0.0317(19) 0.0306(18) 0.0280(18) -0.0038(14) 0.0134(15) -0.0040(14) 
C11' 0.0275(17) 0.0228(16) 0.0247(16) 0.0004(13) 0.0074(13) -0.0054(13) 
O11' 0.0235(12) 0.0234(12) 0.0268(12) -0.0026(9) 0.0032(10) -0.0038(9) 
C12' 0.0340(19) 0.0304(18) 0.0251(17) 0.0010(14) 0.0145(15) -0.0051(15) 
C13' 0.0297(18) 0.039(2) 0.0267(18) -0.0003(15) 0.0131(15) 0.0012(15) 
N14' 0.0278(15) 0.0275(15) 0.0275(15) -0.0050(12) 0.0089(12) -0.0009(12) 
C15' 0.0189(17) 0.049(2) 0.039(2) -0.0047(18) 0.0063(15) -0.0012(16) 
C16' 0.0257(18) 0.034(2) 0.043(2) -0.0072(17) 0.0113(16) 0.0016(15) 
C17' 0.0307(19) 0.0337(19) 0.0298(19) -0.0031(15) 0.0066(15) -0.0032(15) 
N18' 0.0243(14) 0.0242(14) 0.0282(15) -0.0006(11) 0.0105(12) 0.0020(11) 
C19' 0.039(2) 0.0285(18) 0.0276(18) -0.0012(14) 0.0142(16) 0.0017(15) 
C20' 0.035(2) 0.0301(18) 0.0279(18) -0.0021(14) 0.0157(15) 0.0023(15) 
C21' 0.056(3) 0.048(2) 0.030(2) 0.0049(18) 0.024(2) -0.004(2) 
C22' 0.039(2) 0.055(3) 0.053(3) 0.000(2) 0.025(2) -0.004(2) 
C23' 0.043(3) 0.054(3) 0.056(3) -0.005(2) 0.026(2) -0.007(2) 
C24' 0.075(4) 0.131(6) 0.064(4) -0.001(4) 0.044(3) -0.008(4) 
C25' 0.039(2) 0.040(2) 0.061(3) -0.015(2) 0.013(2) -0.0102(19) 
C26' 0.030(2) 0.059(3) 0.086(4) -0.033(3) -0.006(2) 0.005(2) 
C27' 0.046(2) 0.035(2) 0.032(2) -0.0076(16) 0.0131(18) -0.0167(18) 
C28' 0.045(2) 0.033(2) 0.047(2) -0.0106(18) 0.023(2) -0.0098(17) 
C29' 0.033(2) 0.034(2) 0.036(2) -0.0011(16) 0.0144(16) -0.0034(15) 
C30' 0.063(3) 0.060(3) 0.058(3) -0.027(2) 0.035(3) -0.011(2) 
C31' 0.051(3) 0.039(2) 0.033(2) 0.0026(18) 0.0031(19) 0.0061(19) 
C32' 0.0204(18) 0.079(3) 0.039(2) -0.010(2) -0.0010(16) -0.001(2) 
O40' 0.0294(14) 0.0277(13) 0.0392(15) 0.0045(11) 0.0059(12) -0.0039(10) 
C41' 0.037(2) 0.0322(19) 0.034(2) 0.0024(15) 0.0160(17) 0.0023(16) 
O42' 0.0308(14) 0.0367(15) 0.0350(15) 0.0049(12) 0.0097(12) -0.0047(11) 
C43' 0.061(3) 0.068(4) 0.057(3) 0.022(3) 0.023(3) -0.020(3) 
O45' 0.056(2) 0.0250(14) 0.0495(18) 0.0025(13) 0.0011(15) -0.0025(13) 
C46' 0.033(2) 0.0286(18) 0.032(2) -0.0021(15) 0.0028(16) -0.0035(15) 
O47' 0.063(2) 0.0206(13) 0.0317(15) -0.0006(11) 0.0021(14) -0.0067(12) 
C48' 0.062(3) 0.036(2) 0.051(3) 0.003(2) -0.007(2) -0.002(2) 
O50' 0.0444(16) 0.0237(13) 0.0388(15) 0.0015(11) 0.0145(13) -0.0073(11) 
C51' 0.035(2) 0.0318(19) 0.034(2) 0.0007(15) 0.0103(16) -0.0072(15) 
O52' 0.0370(17) 0.0367(16) 0.069(2) 0.0197(15) 0.0158(15) 0.0030(13) 
C53' 0.054(3) 0.037(2) 0.113(5) 0.010(3) 0.045(3) -0.015(2) 
O55' 0.055(2) 0.0360(16) 0.0399(17) 0.0064(13) 0.0136(14) 0.0141(13) 
C56' 0.078(4) 0.041(2) 0.028(2) -0.0004(18) 0.006(2) 0.026(2) 
O57' 0.079(3) 0.063(2) 0.045(2) -0.0097(18) -0.0011(19) 0.015(2) 
C58' 0.133(7) 0.097(5) 0.081(5) -0.008(4) 0.063(5) 0.048(5) 
  
_geom_special_details 
; 
 All esds (except the esd in the dihedral angle between two l.s. planes) 
 are estimated using the full covariance matrix.  The cell esds are taken 
 into account individually in the estimation of esds in distances, angles 
 and torsion angles; correlations between esds in cell parameters are only 
 used when they are defined by crystal symmetry.  An approximate (isotropic) 
 treatment of cell esds is used for estimating esds involving l.s. planes. 
; 
  
loop_ 
 _geom_bond_atom_site_label_1 
 _geom_bond_atom_site_label_2 
 _geom_bond_distance 
 _geom_bond_site_symmetry_2 
 _geom_bond_publ_flag 
Zn1 N8 2.074(3) . ? 
Zn1 O11 2.093(3) . ? 
Zn1 N4 2.106(3) . ? 
Zn1 O40 2.125(3) . ? 
Zn1 O45 2.177(3) . ? 
Zn1 O45A 2.22(2) . ? 
Zn1 O1 2.232(3) . ? 
Zn2 O11 2.054(3) . ? 
Zn2 O42 2.104(3) . ? 
Zn2 N14 2.119(3) . ? 
Zn2 N18 2.120(3) . ? 
Zn2 O50 2.164(3) . ? 
Zn2 O1 2.215(3) . ? 
Zn3 O52 1.955(3) . ? 
Zn3 O1 1.974(3) . ? 
Zn3 O45 2.012(4) . ? 
Zn3 O55 2.034(3) . ? 
Zn3 O57 2.361(4) . ? 
Zn3A O52A 1.83(3) . ? 
Zn3A O55 1.913(6) . ? 
Zn3A O57 1.938(7) . ? 
Zn3A O47A 2.04(3) . ? 
Zn3A O1 2.330(7) . ? 
O1 C1 1.373(4) . ? 
C1 C2 1.395(5) . ? 
C1 C20 1.416(5) . ? 
C2 C23 1.407(6) . ? 
C2 C3 1.512(6) . ? 
C3 N4 1.477(5) . ? 
N4 C5 1.455(5) . ? 
C5 C6 1.535(6) . ? 
C6 C25 1.511(7) . ? 
C6 C7 1.533(6) . ? 
C6 C26 1.541(6) . ? 
C7 N8 1.489(5) . ? 
N8 C9 1.492(5) . ? 
C9 C10 1.492(5) . ? 
C10 C27 1.398(5) . ? 
C10 C11 1.403(5) . ? 
C11 O11 1.351(4) . ? 
C11 C12 1.431(5) . ? 
C12 C29 1.361(5) . ? 
C12 C13 1.512(5) . ? 
C13 N14 1.456(5) . ? 
N14 C15 1.484(5) . ? 
C15 C16 1.514(6) . ? 
C16 C31 1.527(6) . ? 
C16 C17 1.541(5) . ? 
C16 C32 1.556(5) . ? 
C17 N18 1.451(5) . ? 
N18 C19 1.481(5) . ? 
C19 C20 1.498(6) . ? 
C20 C21 1.382(6) . ? 
C21 C22 1.421(6) . ? 
C22 C23 1.365(7) . ? 
C22 C24 1.511(6) . ? 
C27 C28 1.375(5) . ? 
C28 C29 1.392(6) . ? 
C28 C30 1.502(6) . ? 
O40 C41 1.257(5) . ? 
C41 O42 1.265(5) . ? 
C41 C43 1.519(6) . ? 
O45 C46 1.292(6) . ? 
C46 O47 1.211(6) . ? 
C46 C48 1.534(7) . ? 
O50 C51A 1.240(19) . ? 
O50 C51 1.241(6) . ? 
C51 O52 1.268(6) . ? 
C51 C53 1.481(7) . ? 
O45A C46A 1.31(2) . ? 
C46A O47A 1.32(2) . ? 
C46A C48A 1.499(19) . ? 
C51A O52A 1.24(2) . ? 
C51A C53A 1.526(19) . ? 
O55 C56 1.273(6) . ? 
C56 O57 1.227(5) . ? 
C56 C58 1.517(7) . ? 
Zn1' O11' 2.050(3) . ? 
Zn1' N8' 2.099(3) . ? 
Zn1' O40' 2.101(3) . ? 
Zn1' N4' 2.126(4) . ? 
Zn1' O45' 2.142(3) . ? 
Zn1' O1' 2.314(2) . ? 
Zn2' O11' 2.068(2) . ? 
Zn2' O50' 2.109(3) . ? 
Zn2' N14' 2.112(3) . ? 
Zn2' N18' 2.130(3) . ? 
Zn2' O42' 2.131(3) . ? 
Zn2' O1' 2.253(2) . ? 
Zn3' O55' 1.933(3) . ? 
Zn3' O52' 1.934(3) . ? 
Zn3' O47' 1.964(3) . ? 
Zn3' O1' 2.013(2) . ? 
O1' C1' 1.364(5) . ? 
C1' C2' 1.418(5) . ? 
C1' C20' 1.420(5) . ? 
C2' C23' 1.370(6) . ? 
C2' C3' 1.485(6) . ? 
C3' N4' 1.492(5) . ? 
N4' C5' 1.471(5) . ? 
C5' C6' 1.514(6) . ? 
C6' C25' 1.488(7) . ? 
C6' C26' 1.559(6) . ? 
C6' C7' 1.567(7) . ? 
C7' N8' 1.462(5) . ? 
N8' C9' 1.459(6) . ? 
C9' C10' 1.518(6) . ? 
C10' C27' 1.387(6) . ? 
C10' C11' 1.402(5) . ? 
C11' O11' 1.347(4) . ? 
C11' C12' 1.422(5) . ? 
C12' C29' 1.367(5) . ? 
C12' C13' 1.522(5) . ? 
C13' N14' 1.466(5) . ? 
N14' C15' 1.467(5) . ? 
C15' C16' 1.546(6) . ? 
C16' C31' 1.529(6) . ? 
C16' C17' 1.535(5) . ? 
C16' C32' 1.547(5) . ? 
C17' N18' 1.478(5) . ? 
N18' C19' 1.467(5) . ? 
C19' C20' 1.481(5) . ? 
C20' C21' 1.371(5) . ? 
C21' C22' 1.378(6) . ? 
C22' C23' 1.426(7) . ? 
C22' C24' 1.526(7) . ? 
C27' C28' 1.388(6) . ? 
C28' C29' 1.381(6) . ? 
C28' C30' 1.540(6) . ? 
O40' C41' 1.260(5) . ? 
C41' O42' 1.257(5) . ? 
C41' C43' 1.499(6) . ? 
O45' C46' 1.231(5) . ? 
C46' O47' 1.252(4) . ? 
C46' C48' 1.518(6) . ? 
O50' C51' 1.245(5) . ? 
C51' O52' 1.248(5) . ? 
C51' C53' 1.487(6) . ? 
O55' C56' 1.277(5) . ? 
C56' O57' 1.218(6) . ? 
C56' C58' 1.549(8) . ? 
  
loop_ 
 _geom_angle_atom_site_label_1 
 _geom_angle_atom_site_label_2 
 _geom_angle_atom_site_label_3 
 _geom_angle 
 _geom_angle_site_symmetry_1 
 _geom_angle_site_symmetry_3 
 _geom_angle_publ_flag 
N8 Zn1 O11 93.61(11) . . ? 
N8 Zn1 N4 95.11(13) . . ? 
O11 Zn1 N4 171.08(12) . . ? 
N8 Zn1 O40 89.86(12) . . ? 
O11 Zn1 O40 94.17(11) . . ? 
N4 Zn1 O40 83.99(13) . . ? 
N8 Zn1 O45 100.91(14) . . ? 
O11 Zn1 O45 88.39(12) . . ? 
N4 Zn1 O45 91.79(14) . . ? 
O40 Zn1 O45 168.75(13) . . ? 
N8 Zn1 O45A 87.1(6) . . ? 
O11 Zn1 O45A 95.4(5) . . ? 
N4 Zn1 O45A 87.0(6) . . ? 
O40 Zn1 O45A 170.1(6) . . ? 
O45 Zn1 O45A 15.1(5) . . ? 
N8 Zn1 O1 171.92(11) . . ? 
O11 Zn1 O1 78.96(10) . . ? 
N4 Zn1 O1 92.43(12) . . ? 
O40 Zn1 O1 93.81(10) . . ? 
O45 Zn1 O1 75.92(13) . . ? 
O45A Zn1 O1 90.4(6) . . ? 
O11 Zn2 O42 96.39(11) . . ? 
O11 Zn2 N14 95.33(12) . . ? 
O42 Zn2 N14 87.28(12) . . ? 
O11 Zn2 N18 170.99(11) . . ? 
O42 Zn2 N18 83.41(12) . . ? 
N14 Zn2 N18 93.67(13) . . ? 
O11 Zn2 O50 94.67(11) . . ? 
O42 Zn2 O50 168.10(11) . . ? 
N14 Zn2 O50 87.34(12) . . ? 
N18 Zn2 O50 86.36(12) . . ? 
O11 Zn2 O1 80.19(10) . . ? 
O42 Zn2 O1 95.57(11) . . ? 
N14 Zn2 O1 174.92(12) . . ? 
N18 Zn2 O1 90.85(11) . . ? 
O50 Zn2 O1 90.63(11) . . ? 
O52 Zn3 O1 121.94(12) . . ? 
O52 Zn3 O45 111.76(16) . . ? 
O1 Zn3 O45 85.74(13) . . ? 
O52 Zn3 O55 110.31(15) . . ? 
O1 Zn3 O55 122.23(14) . . ? 
O45 Zn3 O55 97.10(14) . . ? 
O52 Zn3 O57 94.45(15) . . ? 
O1 Zn3 O57 92.81(12) . . ? 
O45 Zn3 O57 149.95(14) . . ? 
O55 Zn3 O57 58.65(13) . . ? 
O52A Zn3A O55 128.1(9) . . ? 
O52A Zn3A O57 92.4(9) . . ? 
O55 Zn3A O57 68.6(2) . . ? 
O52A Zn3A O47A 91.2(11) . . ? 
O55 Zn3A O47A 81.8(8) . . ? 
O57 Zn3A O47A 144.8(8) . . ? 
O52A Zn3A O1 118.4(8) . . ? 
O55 Zn3A O1 111.2(3) . . ? 
O57 Zn3A O1 94.7(2) . . ? 
O47A Zn3A O1 114.1(8) . . ? 
C1 O1 Zn3 118.1(2) . . ? 
C1 O1 Zn2 119.8(2) . . ? 
Zn3 O1 Zn2 108.79(12) . . ? 
C1 O1 Zn1 117.3(2) . . ? 
Zn3 O1 Zn1 98.17(12) . . ? 
Zn2 O1 Zn1 89.22(10) . . ? 
C1 O1 Zn3A 111.6(2) . . ? 
Zn2 O1 Zn3A 105.97(16) . . ? 
Zn1 O1 Zn3A 110.74(19) . . ? 
O1 C1 C2 121.2(3) . . ? 
O1 C1 C20 119.5(3) . . ? 
C2 C1 C20 119.2(3) . . ? 
C1 C2 C23 118.3(4) . . ? 
C1 C2 C3 122.2(4) . . ? 
C23 C2 C3 119.4(4) . . ? 
N4 C3 C2 113.8(3) . . ? 
C5 N4 C3 110.1(3) . . ? 
C5 N4 Zn1 116.1(3) . . ? 
C3 N4 Zn1 110.5(2) . . ? 
N4 C5 C6 114.7(3) . . ? 
C25 C6 C7 112.0(4) . . ? 
C25 C6 C5 112.2(4) . . ? 
C7 C6 C5 111.2(4) . . ? 
C25 C6 C26 108.3(4) . . ? 
C7 C6 C26 104.5(4) . . ? 
C5 C6 C26 108.3(4) . . ? 
N8 C7 C6 114.3(4) . . ? 
C7 N8 C9 108.9(3) . . ? 
C7 N8 Zn1 118.0(3) . . ? 
C9 N8 Zn1 107.9(2) . . ? 
N8 C9 C10 112.1(3) . . ? 
C27 C10 C11 119.7(3) . . ? 
C27 C10 C9 118.5(3) . . ? 
C11 C10 C9 121.7(3) . . ? 
O11 C11 C10 120.6(3) . . ? 
O11 C11 C12 122.9(3) . . ? 
C10 C11 C12 116.5(3) . . ? 
C11 O11 Zn2 123.0(2) . . ? 
C11 O11 Zn1 122.6(2) . . ? 
Zn2 O11 Zn1 97.73(11) . . ? 
C29 C12 C11 120.6(4) . . ? 
C29 C12 C13 119.8(3) . . ? 
C11 C12 C13 119.3(3) . . ? 
N14 C13 C12 116.2(3) . . ? 
C13 N14 C15 109.8(3) . . ? 
C13 N14 Zn2 107.6(2) . . ? 
C15 N14 Zn2 117.3(2) . . ? 
N14 C15 C16 115.8(3) . . ? 
C15 C16 C31 112.4(4) . . ? 
C15 C16 C17 111.7(3) . . ? 
C31 C16 C17 110.0(3) . . ? 
C15 C16 C32 106.5(3) . . ? 
C31 C16 C32 109.5(3) . . ? 
C17 C16 C32 106.5(3) . . ? 
N18 C17 C16 116.4(3) . . ? 
C17 N18 C19 110.5(3) . . ? 
C17 N18 Zn2 115.9(2) . . ? 
C19 N18 Zn2 111.5(2) . . ? 
N18 C19 C20 113.9(3) . . ? 
C21 C20 C1 120.4(4) . . ? 
C21 C20 C19 118.4(4) . . ? 
C1 C20 C19 120.9(4) . . ? 
C20 C21 C22 120.8(4) . . ? 
C23 C22 C21 117.3(4) . . ? 
C23 C22 C24 122.4(4) . . ? 
C21 C22 C24 120.2(4) . . ? 
C22 C23 C2 123.6(4) . . ? 
C28 C27 C10 123.6(4) . . ? 
C27 C28 C29 115.7(4) . . ? 
C27 C28 C30 121.4(4) . . ? 
C29 C28 C30 122.9(4) . . ? 
C12 C29 C28 123.3(4) . . ? 
C41 O40 Zn1 130.6(3) . . ? 
O40 C41 O42 125.1(4) . . ? 
O40 C41 C43 117.8(4) . . ? 
O42 C41 C43 117.1(4) . . ? 
C41 O42 Zn2 128.4(3) . . ? 
C46 O45 Zn3 126.0(3) . . ? 
C46 O45 Zn1 135.1(3) . . ? 
Zn3 O45 Zn1 98.82(15) . . ? 
O47 C46 O45 125.9(5) . . ? 
O47 C46 C48 119.6(5) . . ? 
O45 C46 C48 114.4(4) . . ? 
C51A O50 Zn2 159.3(11) . . ? 
C51 O50 Zn2 144.2(3) . . ? 
O50 C51 O52 124.9(5) . . ? 
O50 C51 C53 117.8(5) . . ? 
O52 C51 C53 117.3(5) . . ? 
C51 O52 Zn3 118.4(3) . . ? 
C46A O45A Zn1 140.4(17) . . ? 
O45A C46A O47A 126(3) . . ? 
O45A C46A C48A 124(3) . . ? 
O47A C46A C48A 110(2) . . ? 
C46A O47A Zn3A 118(2) . . ? 
O52A C51A O50 119(2) . . ? 
O52A C51A C53A 118(2) . . ? 
O50 C51A C53A 122.7(19) . . ? 
C51A O52A Zn3A 124(2) . . ? 
C56 O55 Zn3A 84.7(3) . . ? 
C56 O55 Zn3 97.4(3) . . ? 
O57 C56 O55 120.5(4) . . ? 
O57 C56 C58 120.9(5) . . ? 
O55 C56 C58 118.6(4) . . ? 
C56 O57 Zn3A 84.8(3) . . ? 
C56 O57 Zn3 83.5(3) . . ? 
O11' Zn1' N8' 95.20(11) . . ? 
O11' Zn1' O40' 95.56(10) . . ? 
N8' Zn1' O40' 91.75(12) . . ? 
O11' Zn1' N4' 170.54(12) . . ? 
N8' Zn1' N4' 94.07(13) . . ? 
O40' Zn1' N4' 82.25(12) . . ? 
O11' Zn1' O45' 93.29(12) . . ? 
N8' Zn1' O45' 85.82(12) . . ? 
O40' Zn1' O45' 171.00(12) . . ? 
N4' Zn1' O45' 89.27(14) . . ? 
O11' Zn1' O1' 80.45(9) . . ? 
N8' Zn1' O1' 174.13(12) . . ? 
O40' Zn1' O1' 92.59(10) . . ? 
N4' Zn1' O1' 90.44(11) . . ? 
O45' Zn1' O1' 90.48(10) . . ? 
O11' Zn2' O50' 95.54(10) . . ? 
O11' Zn2' N14' 94.28(11) . . ? 
O50' Zn2' N14' 86.18(12) . . ? 
O11' Zn2' N18' 171.68(10) . . ? 
O50' Zn2' N18' 87.96(11) . . ? 
N14' Zn2' N18' 93.48(11) . . ? 
O11' Zn2' O42' 95.16(10) . . ? 
O50' Zn2' O42' 169.05(11) . . ? 
N14' Zn2' O42' 90.68(11) . . ? 
N18' Zn2' O42' 81.76(11) . . ? 
O11' Zn2' O1' 81.53(9) . . ? 
O50' Zn2' O1' 90.61(10) . . ? 
N14' Zn2' O1' 174.46(11) . . ? 
N18' Zn2' O1' 90.91(10) . . ? 
O42' Zn2' O1' 93.29(10) . . ? 
O55' Zn3' O52' 122.94(15) . . ? 
O55' Zn3' O47' 97.44(13) . . ? 
O52' Zn3' O47' 99.68(14) . . ? 
O55' Zn3' O1' 103.32(12) . . ? 
O52' Zn3' O1' 114.71(11) . . ? 
O47' Zn3' O1' 118.45(10) . . ? 
C1' O1' Zn3' 111.7(2) . . ? 
C1' O1' Zn2' 115.5(2) . . ? 
Zn3' O1' Zn2' 114.37(11) . . ? 
C1' O1' Zn1' 115.0(2) . . ? 
Zn3' O1' Zn1' 111.55(11) . . ? 
Zn2' O1' Zn1' 86.53(8) . . ? 
O1' C1' C2' 121.0(4) . . ? 
O1' C1' C20' 120.3(3) . . ? 
C2' C1' C20' 118.5(4) . . ? 
C23' C2' C1' 119.2(4) . . ? 
C23' C2' C3' 120.0(4) . . ? 
C1' C2' C3' 120.7(4) . . ? 
C2' C3' N4' 114.7(3) . . ? 
C5' N4' C3' 111.1(3) . . ? 
C5' N4' Zn1' 116.6(3) . . ? 
C3' N4' Zn1' 111.9(2) . . ? 
N4' C5' C6' 113.7(3) . . ? 
C25' C6' C5' 112.8(4) . . ? 
C25' C6' C26' 108.9(4) . . ? 
C5' C6' C26' 105.5(3) . . ? 
C25' C6' C7' 112.3(4) . . ? 
C5' C6' C7' 112.4(4) . . ? 
C26' C6' C7' 104.3(4) . . ? 
N8' C7' C6' 115.1(4) . . ? 
C9' N8' C7' 108.5(3) . . ? 
C9' N8' Zn1' 108.1(2) . . ? 
C7' N8' Zn1' 116.6(2) . . ? 
N8' C9' C10' 115.6(3) . . ? 
C27' C10' C11' 122.1(4) . . ? 
C27' C10' C9' 116.8(3) . . ? 
C11' C10' C9' 120.7(3) . . ? 
O11' C11' C10' 122.9(3) . . ? 
O11' C11' C12' 121.3(3) . . ? 
C10' C11' C12' 115.6(3) . . ? 
C11' O11' Zn1' 122.9(2) . . ? 
C11' O11' Zn2' 124.1(2) . . ? 
Zn1' O11' Zn2' 98.98(11) . . ? 
C29' C12' C11' 120.9(3) . . ? 
C29' C12' C13' 117.8(3) . . ? 
C11' C12' C13' 121.0(3) . . ? 
N14' C13' C12' 115.4(3) . . ? 
C13' N14' C15' 108.5(3) . . ? 
C13' N14' Zn2' 107.5(2) . . ? 
C15' N14' Zn2' 117.1(2) . . ? 
N14' C15' C16' 116.7(3) . . ? 
C31' C16' C17' 111.1(3) . . ? 
C31' C16' C15' 111.8(3) . . ? 
C17' C16' C15' 111.0(3) . . ? 
C31' C16' C32' 110.4(4) . . ? 
C17' C16' C32' 106.6(3) . . ? 
C15' C16' C32' 105.8(3) . . ? 
N18' C17' C16' 114.8(3) . . ? 
C19' N18' C17' 111.5(3) . . ? 
C19' N18' Zn2' 110.7(2) . . ? 
C17' N18' Zn2' 116.3(2) . . ? 
N18' C19' C20' 114.1(3) . . ? 
C21' C20' C1' 119.3(4) . . ? 
C21' C20' C19' 120.4(4) . . ? 
C1' C20' C19' 120.2(3) . . ? 
C20' C21' C22' 123.7(4) . . ? 
C21' C22' C23' 116.1(4) . . ? 
C21' C22' C24' 123.8(5) . . ? 
C23' C22' C24' 120.2(5) . . ? 
C2' C23' C22' 122.7(4) . . ? 
C10' C27' C28' 121.0(4) . . ? 
C29' C28' C27' 117.2(4) . . ? 
C29' C28' C30' 122.3(4) . . ? 
C27' C28' C30' 120.5(4) . . ? 
C12' C29' C28' 122.9(4) . . ? 
C41' O40' Zn1' 130.1(3) . . ? 
O42' C41' O40' 125.3(4) . . ? 
O42' C41' C43' 117.0(4) . . ? 
O40' C41' C43' 117.7(4) . . ? 
C41' O42' Zn2' 128.7(3) . . ? 
C46' O45' Zn1' 150.7(3) . . ? 
O45' C46' O47' 125.8(4) . . ? 
O45' C46' C48' 117.8(4) . . ? 
O47' C46' C48' 116.4(4) . . ? 
C46' O47' Zn3' 122.0(3) . . ? 
C51' O50' Zn2' 148.7(3) . . ? 
O50' C51' O52' 126.2(4) . . ? 
O50' C51' C53' 116.6(4) . . ? 
O52' C51' C53' 117.2(4) . . ? 
C51' O52' Zn3' 124.3(3) . . ? 
C56' O55' Zn3' 119.5(3) . . ? 
O57' C56' O55' 124.8(5) . . ? 
O57' C56' C58' 122.8(5) . . ? 
O55' C56' C58' 112.3(5) . . ? 
  
_diffrn_measured_fraction_theta_max    0.919 
_diffrn_reflns_theta_full              30.00 
_diffrn_measured_fraction_theta_full   0.980 
_refine_diff_density_max    0.800 
_refine_diff_density_min   -0.727 
_refine_diff_density_rms    0.117 
  
# SQUEEZE RESULTS (APPEND TO CIF)
# Note: Data are Listed for all Voids in the P1 Unit Cell
# i.e. Centre of Gravity, Solvent Accessible Volume,
# Recovered number of Electrons in the Void and
# Details about the Squeezed Material
loop_
  _platon_squeeze_void_nr
  _platon_squeeze_void_average_x
  _platon_squeeze_void_average_y
  _platon_squeeze_void_average_z
  _platon_squeeze_void_volume
  _platon_squeeze_void_count_electrons
  _platon_squeeze_void_content
   1  0.278  0.239  0.259      3716       589 ' '
_platon_squeeze_details
;
 SQUEEZE suggests 589e/cell, which is 147.25e/asu or 73.6e/complex.
 Before SQUEEZE, solvent looked like thf in 6 different sites per asu.
 thf = C4H8O = 40e, 1.75thf = 70e. This is close to the 73.6e/complex
 suggested by SQUEEZE so this was considered to be the solvent present.

 asu thus 3.5thf low = C14 H28 O3.5, so UNIT C56 H112 O14 low,
 i.e. C288 H432 N32 O80 Zn24
;

#===END

  
data_[L3Zn3(OAc)4]
  
_audit_creation_method            SHELXL-97 
_chemical_name_systematic 
; 
 ? 
; 
_chemical_name_common             ? 
_chemical_melting_point           ? 
_chemical_formula_moiety
 'C36 H54 N4 O12 Zn3, 2.25(C4 H8 O)'
_chemical_formula_sum 
 'C45 H72 N4 O14.25 Zn3' 
_chemical_formula_weight          1093.18 
  
loop_ 
 _atom_type_symbol 
 _atom_type_description 
 _atom_type_scat_dispersion_real 
 _atom_type_scat_dispersion_imag 
 _atom_type_scat_source 
 'C'  'C'   0.0181   0.0091 
 'International Tables Vol C Tables 4.2.6.8 and 6.1.1.4' 
 'H'  'H'   0.0000   0.0000 
 'International Tables Vol C Tables 4.2.6.8 and 6.1.1.4' 
 'N'  'N'   0.0311   0.0180 
 'International Tables Vol C Tables 4.2.6.8 and 6.1.1.4' 
 'O'  'O'   0.0492   0.0322 
 'International Tables Vol C Tables 4.2.6.8 and 6.1.1.4' 
 'Zn'  'Zn'  -1.5491   0.6778 
 'International Tables Vol C Tables 4.2.6.8 and 6.1.1.4' 
  
_symmetry_cell_setting            Triclinic 
_symmetry_space_group_name_H-M    P-1 
  
loop_ 
 _symmetry_equiv_pos_as_xyz 
 'x, y, z' 
 '-x, -y, -z' 
  
_cell_length_a                    20.2849(5) 
_cell_length_b                    20.4982(4) 
_cell_length_c                    23.6840(6) 
_cell_angle_alpha                 73.361(2) 
_cell_angle_beta                  89.007(2) 
_cell_angle_gamma                 61.549(2) 
_cell_volume                      8212.7(4) 
_cell_formula_units_Z             6 
_cell_measurement_temperature     173(2) 
_cell_measurement_reflns_used     14422 
_cell_measurement_theta_min       1.9641 
_cell_measurement_theta_max       62.7114 
  
_exptl_crystal_description        blocks 
_exptl_crystal_colour             Colourless 
_exptl_crystal_size_max           0.23 
_exptl_crystal_size_mid           0.11 
_exptl_crystal_size_min           0.05 
_exptl_crystal_density_meas       ? 
_exptl_crystal_density_diffrn     1.326 
_exptl_crystal_density_method     'not measured' 
_exptl_crystal_F_000              3444 
_exptl_absorpt_coefficient_mu     2.045 
_exptl_absorpt_correction_type    multi-scan 
_exptl_absorpt_correction_T_min   0.92451 
_exptl_absorpt_correction_T_max   1.00000 
_exptl_absorpt_process_details     
; 
CrysAlis RED, Oxford Diffraction Ltd., 
Version 1.171.32.29 (release 10-06-2008 CrysAlis171 .NET) 
(compiled Jun 10 2008,16:49:55) 
Empirical absorption correction using spherical harmonics, 
implemented in SCALE3 ABSPACK scaling algorithm. 
; 
  
_exptl_special_details 
; 
 ? 
; 
  
_diffrn_ambient_temperature       173(2) 
_diffrn_radiation_wavelength      1.54184 
_diffrn_radiation_type            CuK\a 
_diffrn_radiation_source         'Enhance Ultra (Cu) X-ray Source'
_diffrn_radiation_monochromator   graphite 
_diffrn_measurement_device_type   'OD Xcalibur PX Ultra' 
_diffrn_measurement_method        'omega scans' 
_diffrn_detector_area_resol_mean  8.2556 
_diffrn_standards_number          0 
_diffrn_standards_interval_count  ? 
_diffrn_standards_interval_time   ? 
_diffrn_standards_decay_%         ? 
_diffrn_reflns_number             41630 
_diffrn_reflns_av_R_equivalents   0.0344 
_diffrn_reflns_av_sigmaI/netI     0.0554 
_diffrn_reflns_limit_h_min        -23 
_diffrn_reflns_limit_h_max        22 
_diffrn_reflns_limit_k_min        -23 
_diffrn_reflns_limit_k_max        17 
_diffrn_reflns_limit_l_min        -25 
_diffrn_reflns_limit_l_max        27 
_diffrn_reflns_theta_min          1.97 
_diffrn_reflns_theta_max          62.83 
_reflns_number_total              24994 
_reflns_number_gt                 16255 
_reflns_threshold_expression      >2sigma(I) 
  
_computing_data_collection        'CrysAlis CCD, Oxford Diffraction Ltd' 
_computing_cell_refinement        'CrysAlis RED, Oxford Diffraction Ltd' 
_computing_data_reduction         'CrysAlis RED, Oxford Diffraction Ltd' 
_computing_structure_solution     'SHELXS-97 (Sheldrick, 1990)' 
_computing_structure_refinement   'SHELXL-97 (Sheldrick, 1997)' 
_computing_molecular_graphics     'Bruker SHELXTL' 
_computing_publication_material   'Bruker SHELXTL' 
  
_refine_special_details 
; 
 Refinement of F^2^ against ALL reflections.  The weighted R-factor wR and 
 goodness of fit S are based on F^2^, conventional R-factors R are based 
 on F, with F set to zero for negative F^2^. The threshold expression of 
 F^2^ > 2sigma(F^2^) is used only for calculating R-factors(gt) etc. and is 
 not relevant to the choice of reflections for refinement.  R-factors based 
 on F^2^ are statistically about twice as large as those based on F, and R- 
 factors based on ALL data will be even larger. 
; 
  
_refine_ls_structure_factor_coef  Fsqd 
_refine_ls_matrix_type            full 
_refine_ls_weighting_scheme       calc 
_refine_ls_weighting_details 
 'calc w=1/[\s^2^(Fo^2^)+(0.0773P)^2^+0.0000P] where P=(Fo^2^+2Fc^2^)/3' 
_atom_sites_solution_primary      direct 
_atom_sites_solution_secondary    difmap 
_atom_sites_solution_hydrogens    geom 
_refine_ls_hydrogen_treatment     mixed 
_refine_ls_extinction_method      none 
_refine_ls_extinction_coef        ? 
_refine_ls_number_reflns          24994 
_refine_ls_number_parameters      1551 
_refine_ls_number_restraints      33 
_refine_ls_R_factor_all           0.0727 
_refine_ls_R_factor_gt            0.0457 
_refine_ls_wR_factor_ref          0.1294 
_refine_ls_wR_factor_gt           0.1197 
_refine_ls_goodness_of_fit_ref    0.935 
_refine_ls_restrained_S_all       0.936 
_refine_ls_shift/su_max           0.003 
_refine_ls_shift/su_mean          0.000 
  
loop_ 
 _atom_site_label 
 _atom_site_type_symbol 
 _atom_site_fract_x 
 _atom_site_fract_y 
 _atom_site_fract_z 
 _atom_site_U_iso_or_equiv 
 _atom_site_adp_type 
 _atom_site_occupancy 
 _atom_site_symmetry_multiplicity 
 _atom_site_calc_flag 
 _atom_site_refinement_flags 
 _atom_site_disorder_assembly 
 _atom_site_disorder_group 
Zn1 Zn 0.50947(3) 0.95077(3) 0.72559(2) 0.04375(14) Uani 1 1 d . . . 
Zn2 Zn 0.41322(3) 0.95168(3) 0.83120(2) 0.04180(14) Uani 1 1 d . . . 
Zn3 Zn 0.41720(3) 1.11810(3) 0.74631(2) 0.04487(15) Uani 1 1 d . . . 
O1 O 0.39259(13) 1.03735(15) 0.74056(11) 0.0391(6) Uani 1 1 d . . . 
C1 C 0.3336(2) 1.0521(2) 0.70245(17) 0.0371(9) Uani 1 1 d . . . 
C2 C 0.3404(2) 1.0592(2) 0.64212(18) 0.0406(10) Uani 1 1 d . . . 
C3 C 0.4039(2) 1.0686(2) 0.61451(18) 0.0419(10) Uani 1 1 d . . . 
H3A H 0.3912 1.0892 0.5706 0.050 Uiso 1 1 calc R . . 
H3B H 0.4116 1.1062 0.6281 0.050 Uiso 1 1 calc R . . 
N4 N 0.47428(18) 0.9914(2) 0.63229(15) 0.0432(8) Uani 1 1 d D . . 
H4 H 0.461(2) 0.9558(18) 0.6312(19) 0.052(13) Uiso 1 1 d D . . 
C5 C 0.5323(2) 0.9898(3) 0.59369(19) 0.0512(11) Uani 1 1 d . . . 
H5A H 0.5519 1.0229 0.6012 0.061 Uiso 1 1 calc R . . 
H5B H 0.5087 1.0122 0.5516 0.061 Uiso 1 1 calc R . . 
C6 C 0.5991(2) 0.9062(3) 0.6042(2) 0.0533(12) Uani 1 1 d . . . 
C7 C 0.6501(2) 0.8776(3) 0.6625(2) 0.0550(12) Uani 1 1 d . . . 
H7A H 0.6963 0.8281 0.6644 0.066 Uiso 1 1 calc R . . 
H7B H 0.6660 0.9165 0.6621 0.066 Uiso 1 1 calc R . . 
N8 N 0.61566(19) 0.8644(2) 0.71690(16) 0.0478(9) Uani 1 1 d D . . 
H8 H 0.614(2) 0.8192(12) 0.7287(17) 0.043(13) Uiso 1 1 d D . . 
C9 C 0.6678(2) 0.8454(3) 0.7691(2) 0.0553(12) Uani 1 1 d . . . 
H9A H 0.6657 0.8941 0.7705 0.066 Uiso 1 1 calc R . . 
H9B H 0.7201 0.8100 0.7638 0.066 Uiso 1 1 calc R . . 
C10 C 0.6511(2) 0.8071(3) 0.8277(2) 0.0485(11) Uani 1 1 d . . . 
C11 C 0.5833(2) 0.8467(2) 0.85063(19) 0.0433(10) Uani 1 1 d . . . 
O11 O 0.52573(14) 0.91660(16) 0.81751(11) 0.0420(7) Uani 1 1 d . . . 
C12 C 0.5804(2) 0.8129(2) 0.91112(19) 0.0459(10) Uani 1 1 d . . . 
C13 C 0.5179(2) 0.8572(3) 0.94280(19) 0.0481(11) Uani 1 1 d . . . 
H13A H 0.5293 0.8263 0.9855 0.058 Uiso 1 1 calc R . . 
H13B H 0.5167 0.9070 0.9398 0.058 Uiso 1 1 calc R . . 
N14 N 0.44225(18) 0.8749(2) 0.91904(15) 0.0444(8) Uani 1 1 d D . . 
H14 H 0.454(2) 0.8267(9) 0.9188(17) 0.041(12) Uiso 1 1 d D . . 
C15 C 0.3887(2) 0.9021(3) 0.96156(18) 0.0502(11) Uani 1 1 d . . . 
H15A H 0.3899 0.9470 0.9684 0.060 Uiso 1 1 calc R . . 
H15B H 0.4067 0.8596 1.0001 0.060 Uiso 1 1 calc R . . 
C16 C 0.3063(2) 0.9270(3) 0.94150(18) 0.0493(11) Uani 1 1 d . . . 
C17 C 0.2683(2) 1.0030(3) 0.88951(17) 0.0459(11) Uani 1 1 d . . . 
H17A H 0.2130 1.0226 0.8846 0.055 Uiso 1 1 calc R . . 
H17B H 0.2767 1.0425 0.8993 0.055 Uiso 1 1 calc R . . 
N18 N 0.29607(17) 0.9950(2) 0.83222(14) 0.0385(8) Uani 1 1 d D . . 
H18 H 0.2832(19) 0.9614(16) 0.8253(16) 0.031(10) Uiso 1 1 d D . . 
C19 C 0.2516(2) 1.0688(2) 0.78368(18) 0.0422(10) Uani 1 1 d . . . 
H19A H 0.2636 1.1085 0.7885 0.051 Uiso 1 1 calc R . . 
H19B H 0.1970 1.0881 0.7861 0.051 Uiso 1 1 calc R . . 
C20 C 0.2678(2) 1.0586(2) 0.72306(17) 0.0376(9) Uani 1 1 d . . . 
C21 C 0.2133(2) 1.0584(2) 0.68696(18) 0.0425(10) Uani 1 1 d . . . 
H21A H 0.1688 1.0606 0.7019 0.051 Uiso 1 1 calc R . . 
C22 C 0.2248(2) 1.0551(2) 0.63016(18) 0.0398(9) Uani 1 1 d . . . 
C23 C 0.2867(2) 1.0583(2) 0.60757(18) 0.0416(10) Uani 1 1 d . . . 
H23A H 0.2926 1.0599 0.5674 0.050 Uiso 1 1 calc R . . 
O24 O 0.17812(15) 1.05000(18) 0.59204(13) 0.0523(8) Uani 1 1 d . . . 
C25 C 0.1105(3) 1.0542(4) 0.6099(2) 0.0767(17) Uani 1 1 d . . . 
H25A H 0.0834 1.0494 0.5788 0.115 Uiso 1 1 calc R . . 
H25B H 0.0788 1.1046 0.6166 0.115 Uiso 1 1 calc R . . 
H25C H 0.1218 1.0116 0.6469 0.115 Uiso 1 1 calc R . . 
C26 C 0.5731(2) 0.8489(3) 0.6010(2) 0.0605(13) Uani 1 1 d . . . 
H26A H 0.6173 0.7969 0.6080 0.091 Uiso 1 1 calc R . . 
H26B H 0.5450 0.8664 0.5615 0.091 Uiso 1 1 calc R . . 
H26C H 0.5402 0.8465 0.6314 0.091 Uiso 1 1 calc R . . 
C27 C 0.6487(3) 0.9103(3) 0.5548(2) 0.0655(14) Uani 1 1 d . . . 
H27A H 0.6917 0.8580 0.5603 0.098 Uiso 1 1 calc R . . 
H27B H 0.6675 0.9458 0.5569 0.098 Uiso 1 1 calc R . . 
H27C H 0.6185 0.9299 0.5159 0.098 Uiso 1 1 calc R . . 
C28 C 0.7092(2) 0.7338(3) 0.8621(2) 0.0581(13) Uani 1 1 d . . . 
H28A H 0.7536 0.7075 0.8455 0.070 Uiso 1 1 calc R . . 
C29 C 0.7033(2) 0.7000(3) 0.9184(2) 0.0611(13) Uani 1 1 d . . . 
C30 C 0.6389(2) 0.7407(3) 0.9447(2) 0.0568(12) Uani 1 1 d . . . 
H30A H 0.6361 0.7185 0.9852 0.068 Uiso 1 1 calc R . . 
O31 O 0.75700(18) 0.62721(19) 0.95581(16) 0.0766(10) Uani 1 1 d . . . 
C32 C 0.8195(3) 0.5829(3) 0.9293(3) 0.094(2) Uani 1 1 d . . . 
H32A H 0.8545 0.5331 0.9592 0.141 Uiso 1 1 calc R . . 
H32B H 0.8459 0.6124 0.9139 0.141 Uiso 1 1 calc R . . 
H32C H 0.8011 0.5728 0.8965 0.141 Uiso 1 1 calc R . . 
C33 C 0.2999(3) 0.8614(3) 0.9277(2) 0.0597(12) Uani 1 1 d . . . 
H33A H 0.3263 0.8503 0.8938 0.090 Uiso 1 1 calc R . . 
H33B H 0.2464 0.8778 0.9181 0.090 Uiso 1 1 calc R . . 
H33C H 0.3229 0.8142 0.9626 0.090 Uiso 1 1 calc R . . 
C34 C 0.2635(3) 0.9448(3) 0.9946(2) 0.0659(14) Uani 1 1 d . . . 
H34A H 0.2669 0.9870 1.0035 0.099 Uiso 1 1 calc R . . 
H34B H 0.2862 0.8978 1.0296 0.099 Uiso 1 1 calc R . . 
H34C H 0.2101 0.9609 0.9845 0.099 Uiso 1 1 calc R . . 
O40 O 0.46962(15) 0.87247(17) 0.72222(13) 0.0485(7) Uani 1 1 d . . . 
C41 C 0.4266(3) 0.8535(3) 0.7530(2) 0.0537(12) Uani 1 1 d . . . 
O42 O 0.40468(16) 0.87033(17) 0.79884(13) 0.0511(7) Uani 1 1 d . . . 
C43 C 0.3970(4) 0.8081(4) 0.7307(3) 0.106(2) Uani 1 1 d U . . 
H43A H 0.3637 0.7973 0.7577 0.160 Uiso 1 1 calc R . . 
H43B H 0.4397 0.7586 0.7294 0.160 Uiso 1 1 calc R . . 
H43C H 0.3685 0.8392 0.6907 0.160 Uiso 1 1 calc R . . 
O45 O 0.51761(14) 1.05376(16) 0.72002(13) 0.0470(7) Uani 1 1 d . . . 
C46 C 0.5698(2) 1.0726(3) 0.70742(19) 0.0480(11) Uani 1 1 d . . . 
O47 O 0.62754(16) 1.03316(19) 0.68935(14) 0.0598(8) Uani 1 1 d . . . 
C48 C 0.5568(3) 1.1469(3) 0.7171(3) 0.0742(16) Uani 1 1 d . . . 
H48A H 0.6020 1.1525 0.7106 0.111 Uiso 1 1 calc R . . 
H48B H 0.5466 1.1452 0.7579 0.111 Uiso 1 1 calc R . . 
H48C H 0.5133 1.1916 0.6890 0.111 Uiso 1 1 calc R . . 
O50 O 0.40552(16) 1.03943(17) 0.87007(13) 0.0499(7) Uani 1 1 d . . . 
C51 C 0.4353(2) 1.0805(3) 0.8692(2) 0.0476(11) Uani 1 1 d . . . 
O52 O 0.45105(16) 1.11721(18) 0.82261(13) 0.0512(7) Uani 1 1 d . . . 
C53 C 0.4556(3) 1.0884(3) 0.9269(2) 0.0575(12) Uani 1 1 d . . . 
H53A H 0.4298 1.0705 0.9578 0.086 Uiso 1 1 calc R . . 
H53B H 0.4397 1.1433 0.9213 0.086 Uiso 1 1 calc R . . 
H53C H 0.5105 1.0566 0.9391 0.086 Uiso 1 1 calc R . . 
O55 O 0.36852(17) 1.22003(18) 0.68634(14) 0.0595(8) Uani 1 1 d . . . 
C56 C 0.3069(2) 1.2623(3) 0.7053(2) 0.0547(12) Uani 1 1 d . . . 
O57 O 0.28309(18) 1.23438(19) 0.74844(15) 0.0623(8) Uani 1 1 d . . . 
C58 C 0.2658(3) 1.3484(3) 0.6703(3) 0.0745(15) Uani 1 1 d U . . 
H58A H 0.2190 1.3750 0.6865 0.112 Uiso 1 1 calc R . . 
H58B H 0.2535 1.3552 0.6285 0.112 Uiso 1 1 calc R . . 
H58C H 0.2983 1.3709 0.6733 0.112 Uiso 1 1 calc R . . 
Zn1' Zn 0.96941(3) 0.58776(3) 0.70890(2) 0.04670(15) Uani 1 1 d . . . 
Zn2' Zn 1.06071(3) 0.42615(3) 0.80907(2) 0.04253(14) Uani 1 1 d . . . 
Zn3' Zn 0.89207(3) 0.48051(4) 0.73779(3) 0.05403(16) Uani 1 1 d . . . 
O1' O 0.99600(14) 0.46321(15) 0.72239(12) 0.0448(7) Uani 1 1 d . . . 
C1' C 1.0308(2) 0.4279(2) 0.68104(18) 0.0427(10) Uani 1 1 d . . . 
C2' C 1.0144(3) 0.4715(3) 0.6208(2) 0.0544(12) Uani 1 1 d . . . 
C3' C 0.9521(3) 0.5559(2) 0.5966(2) 0.0599(13) Uani 1 1 d . . . 
H3'A H 0.9461 0.5726 0.5525 0.072 Uiso 1 1 calc R . . 
H3'B H 0.9038 0.5598 0.6088 0.072 Uiso 1 1 calc R . . 
N4' N 0.9676(2) 0.6097(2) 0.61769(16) 0.0537(10) Uani 1 1 d D . . 
H4' H 1.0139(12) 0.602(3) 0.610(2) 0.069(17) Uiso 1 1 d D . . 
C5' C 0.9172(3) 0.6911(2) 0.57909(19) 0.0586(13) Uani 1 1 d . . . 
H5'A H 0.8642 0.7017 0.5787 0.070 Uiso 1 1 calc R . . 
H5'B H 0.9291 0.6954 0.5379 0.070 Uiso 1 1 calc R . . 
C6' C 0.9229(2) 0.7545(2) 0.59757(19) 0.0507(11) Uani 1 1 d . . . 
C7' C 0.8862(2) 0.7650(2) 0.65406(17) 0.0431(10) Uani 1 1 d . . . 
H7'A H 0.8783 0.8148 0.6582 0.052 Uiso 1 1 calc R . . 
H7'B H 0.8358 0.7693 0.6490 0.052 Uiso 1 1 calc R . . 
N8' N 0.93051(18) 0.70137(19) 0.70941(14) 0.0395(8) Uani 1 1 d D . . 
H8' H 0.9735(12) 0.702(2) 0.7172(17) 0.045(12) Uiso 1 1 d D . . 
C9' C 0.8859(2) 0.7112(2) 0.75937(17) 0.0422(10) Uani 1 1 d . . . 
H9'A H 0.8472 0.6958 0.7556 0.051 Uiso 1 1 calc R . . 
H9'B H 0.8592 0.7671 0.7568 0.051 Uiso 1 1 calc R . . 
C10' C 0.9340(2) 0.6634(2) 0.81921(18) 0.0423(10) Uani 1 1 d . . . 
C11' C 0.9762(2) 0.5812(2) 0.83760(18) 0.0402(10) Uani 1 1 d . . . 
O11' O 0.97900(15) 0.54137(15) 0.79966(12) 0.0434(7) Uani 1 1 d . . . 
C12' C 1.0147(2) 0.5412(2) 0.89606(18) 0.0440(10) Uani 1 1 d . . . 
C13' C 1.0490(3) 0.4547(3) 0.92457(19) 0.0517(11) Uani 1 1 d . . . 
H13C H 1.0709 0.4412 0.9660 0.062 Uiso 1 1 calc R . . 
H13D H 1.0078 0.4415 0.9265 0.062 Uiso 1 1 calc R . . 
N14' N 1.1085(2) 0.4046(2) 0.89510(15) 0.0460(9) Uani 1 1 d D . . 
H14' H 1.135(2) 0.430(2) 0.886(2) 0.070(17) Uiso 1 1 d D . . 
C15' C 1.1468(3) 0.3226(2) 0.93466(19) 0.0540(12) Uani 1 1 d . . . 
H15C H 1.1076 0.3081 0.9476 0.065 Uiso 1 1 calc R . . 
H15D H 1.1737 0.3195 0.9706 0.065 Uiso 1 1 calc R . . 
C16' C 1.2037(3) 0.2619(2) 0.90766(19) 0.0528(12) Uani 1 1 d . . . 
C17' C 1.1629(2) 0.2508(2) 0.86004(18) 0.0484(11) Uani 1 1 d . . . 
H17C H 1.1984 0.2013 0.8526 0.058 Uiso 1 1 calc R . . 
H17D H 1.1198 0.2453 0.8761 0.058 Uiso 1 1 calc R . . 
N18' N 1.13420(18) 0.31466(19) 0.80273(15) 0.0423(8) Uani 1 1 d D . . 
H18' H 1.1747(14) 0.315(2) 0.7872(17) 0.055(14) Uiso 1 1 d D . . 
C19' C 1.0951(2) 0.2972(2) 0.76172(18) 0.0431(10) Uani 1 1 d . . . 
H19C H 1.0459 0.3052 0.7746 0.052 Uiso 1 1 calc R . . 
H19D H 1.1261 0.2415 0.7641 0.052 Uiso 1 1 calc R . . 
C20' C 1.0818(2) 0.3475(2) 0.69847(18) 0.0415(10) Uani 1 1 d . . . 
C21' C 1.1197(2) 0.3131(2) 0.65667(19) 0.0460(11) Uani 1 1 d . . . 
H21B H 1.1548 0.2586 0.6688 0.055 Uiso 1 1 calc R . . 
C22' C 1.1073(3) 0.3568(3) 0.5982(2) 0.0548(12) Uani 1 1 d . . . 
C23' C 1.0546(3) 0.4354(3) 0.5802(2) 0.0588(13) Uani 1 1 d . . . 
H23B H 1.0457 0.4654 0.5395 0.071 Uiso 1 1 calc R . . 
O24' O 1.14442(19) 0.32927(18) 0.55316(13) 0.0678(10) Uani 1 1 d . . . 
C25' C 1.1947(3) 0.2471(3) 0.5690(2) 0.0794(17) Uani 1 1 d . . . 
H25D H 1.2173 0.2342 0.5341 0.119 Uiso 1 1 calc R . . 
H25E H 1.1666 0.2191 0.5832 0.119 Uiso 1 1 calc R . . 
H25F H 1.2349 0.2314 0.6006 0.119 Uiso 1 1 calc R . . 
C26' C 1.0034(3) 0.7402(3) 0.6044(2) 0.0662(14) Uani 1 1 d . . . 
H26D H 1.0346 0.6914 0.6366 0.099 Uiso 1 1 calc R . . 
H26E H 1.0034 0.7838 0.6137 0.099 Uiso 1 1 calc R . . 
H26F H 1.0243 0.7361 0.5671 0.099 Uiso 1 1 calc R . . 
C27' C 0.8742(3) 0.8313(3) 0.5471(2) 0.0684(14) Uani 1 1 d . . . 
H27D H 0.8754 0.8745 0.5562 0.103 Uiso 1 1 calc R . . 
H27E H 0.8218 0.8416 0.5433 0.103 Uiso 1 1 calc R . . 
H27F H 0.8943 0.8270 0.5096 0.103 Uiso 1 1 calc R . . 
C28' C 0.9323(2) 0.7039(3) 0.85865(18) 0.0485(11) Uani 1 1 d . . . 
H28B H 0.9027 0.7593 0.8465 0.058 Uiso 1 1 calc R . . 
C29' C 0.9733(3) 0.6638(3) 0.91466(19) 0.0513(11) Uani 1 1 d . . . 
C30' C 1.0133(2) 0.5830(3) 0.93312(19) 0.0518(11) Uani 1 1 d . . . 
H30B H 1.0404 0.5555 0.9723 0.062 Uiso 1 1 calc R . . 
O31' O 0.9768(2) 0.69834(18) 0.95580(13) 0.0682(10) Uani 1 1 d . . . 
C32' C 0.9362(4) 0.7821(3) 0.9367(2) 0.0829(18) Uani 1 1 d . . . 
H32D H 0.9420 0.8005 0.9691 0.124 Uiso 1 1 calc R . . 
H32E H 0.8824 0.8008 0.9256 0.124 Uiso 1 1 calc R . . 
H32F H 0.9562 0.8023 0.9022 0.124 Uiso 1 1 calc R . . 
C33' C 1.2647(2) 0.2820(3) 0.8840(2) 0.0601(13) Uani 1 1 d . . . 
H33D H 1.2411 0.3319 0.8516 0.090 Uiso 1 1 calc R . . 
H33E H 1.3016 0.2407 0.8692 0.090 Uiso 1 1 calc R . . 
H33F H 1.2905 0.2864 0.9162 0.090 Uiso 1 1 calc R . . 
C34' C 1.2407(3) 0.1835(3) 0.9591(2) 0.0687(15) Uani 1 1 d . . . 
H34D H 1.2679 0.1875 0.9906 0.103 Uiso 1 1 calc R . . 
H34E H 1.2764 0.1415 0.9441 0.103 Uiso 1 1 calc R . . 
H34F H 1.2014 0.1717 0.9751 0.103 Uiso 1 1 calc R . . 
O40' O 1.08107(16) 0.56677(17) 0.70827(13) 0.0552(8) Uani 1 1 d . . . 
C41' C 1.1406(3) 0.5117(3) 0.7407(2) 0.0481(11) Uani 1 1 d . . . 
O42' O 1.14612(15) 0.45296(17) 0.77966(13) 0.0505(7) Uani 1 1 d . . . 
C43' C 1.2128(3) 0.5170(3) 0.7320(3) 0.0784(16) Uani 1 1 d . . . 
H43D H 1.2138 0.5521 0.7524 0.118 Uiso 1 1 calc R . . 
H43E H 1.2138 0.5376 0.6894 0.118 Uiso 1 1 calc R . . 
H43F H 1.2570 0.4649 0.7487 0.118 Uiso 1 1 calc R . . 
O45' O 0.85339(15) 0.59583(17) 0.70485(15) 0.0594(9) Uani 1 1 d . . . 
C46' C 0.7835(3) 0.6464(3) 0.6875(3) 0.0760(17) Uani 1 1 d . . . 
O47' O 0.7624(2) 0.7065(3) 0.6439(2) 0.1136(17) Uani 1 1 d . . . 
C48' C 0.7274(3) 0.6275(4) 0.7213(3) 0.099(2) Uani 1 1 d . . . 
H48D H 0.6803 0.6761 0.7178 0.149 Uiso 1 1 calc R . . 
H48E H 0.7489 0.5996 0.7633 0.149 Uiso 1 1 calc R . . 
H48F H 0.7166 0.5945 0.7045 0.149 Uiso 1 1 calc R . . 
O50' O 0.99020(16) 0.37714(17) 0.85346(14) 0.0546(8) Uani 1 1 d . . . 
C51' C 0.9218(3) 0.4061(3) 0.8594(2) 0.0559(12) Uani 1 1 d . . . 
O52' O 0.86759(17) 0.4582(2) 0.81765(15) 0.0625(9) Uani 1 1 d . . . 
C53' C 0.8986(3) 0.3774(3) 0.9180(2) 0.0608(13) Uani 1 1 d . . . 
H53D H 0.9186 0.3209 0.9286 0.091 Uiso 1 1 calc R . . 
H53E H 0.8432 0.4040 0.9146 0.091 Uiso 1 1 calc R . . 
H53F H 0.9190 0.3887 0.9489 0.091 Uiso 1 1 calc R . . 
O55' O 0.83193(19) 0.4677(2) 0.68399(15) 0.0684(9) Uani 1 1 d . . . 
C56' C 0.8446(3) 0.3966(3) 0.7023(2) 0.0622(13) Uani 1 1 d . . . 
O57' O 0.8972(2) 0.3447(2) 0.74059(17) 0.0766(11) Uani 1 1 d . . . 
C58' C 0.7897(3) 0.3808(3) 0.6736(3) 0.0867(19) Uani 1 1 d . . . 
H58D H 0.7859 0.3378 0.7019 0.130 Uiso 1 1 calc R . . 
H58E H 0.8081 0.3666 0.6380 0.130 Uiso 1 1 calc R . . 
H58F H 0.7398 0.4280 0.6624 0.130 Uiso 1 1 calc R . . 
Zn1" Zn 0.93823(3) 0.09221(3) 0.76138(2) 0.04470(14) Uani 1 1 d . . . 
Zn2" Zn 0.85396(3) 0.07730(3) 0.65939(2) 0.04359(14) Uani 1 1 d . . . 
Zn3" Zn 1.01384(3) -0.07938(3) 0.74733(2) 0.04415(14) Uani 1 1 d . . . 
O1" O 0.91031(14) 0.00008(15) 0.75161(11) 0.0402(6) Uani 1 1 d . . . 
C1" C 0.8662(2) -0.0178(2) 0.79095(17) 0.0349(9) Uani 1 1 d . . . 
C2" C 0.8753(2) -0.0210(2) 0.85028(18) 0.0393(9) Uani 1 1 d . . . 
C3" C 0.9420(2) -0.0206(3) 0.87621(18) 0.0460(10) Uani 1 1 d . . . 
H3"A H 0.9455 -0.0369 0.9201 0.055 Uiso 1 1 calc R . . 
H3"B H 0.9889 -0.0592 0.8657 0.055 Uiso 1 1 calc R . . 
N4" N 0.93663(19) 0.0568(2) 0.85464(15) 0.0451(9) Uani 1 1 d D . . 
H4" H 0.8904(11) 0.0954(18) 0.8558(19) 0.058(14) Uiso 1 1 d D . . 
C5" C 0.9887(2) 0.0636(3) 0.89239(18) 0.0488(11) Uani 1 1 d . . . 
H5"A H 1.0414 0.0259 0.8900 0.059 Uiso 1 1 calc R . . 
H5"B H 0.9800 0.0486 0.9343 0.059 Uiso 1 1 calc R . . 
C6" C 0.9803(2) 0.1448(3) 0.8757(2) 0.0488(11) Uani 1 1 d . . . 
C7" C 1.0119(2) 0.1633(3) 0.81805(19) 0.0496(11) Uani 1 1 d . . . 
H7"A H 1.0155 0.2110 0.8136 0.060 Uiso 1 1 calc R . . 
H7"B H 1.0640 0.1198 0.8217 0.060 Uiso 1 1 calc R . . 
N8" N 0.96787(19) 0.1756(2) 0.76296(16) 0.0448(8) Uani 1 1 d D . . 
H8" H 0.9233(13) 0.2193(16) 0.759(2) 0.071(16) Uiso 1 1 d D . . 
C9" C 1.0090(2) 0.1848(3) 0.71147(19) 0.0507(11) Uani 1 1 d . . . 
H9"A H 1.0526 0.1330 0.7143 0.061 Uiso 1 1 calc R . . 
H9"B H 1.0295 0.2192 0.7141 0.061 Uiso 1 1 calc R . . 
C10" C 0.9615(2) 0.2184(3) 0.6516(2) 0.0517(11) Uani 1 1 d . . . 
C11" C 0.9293(2) 0.1790(2) 0.63297(19) 0.0431(10) Uani 1 1 d . . . 
O11" O 0.93297(14) 0.11305(16) 0.67048(12) 0.0430(7) Uani 1 1 d . . . 
C12" C 0.8971(2) 0.2071(3) 0.57338(19) 0.0465(10) Uani 1 1 d . . . 
C13" C 0.8765(2) 0.1618(3) 0.5453(2) 0.0522(11) Uani 1 1 d . . . 
H13E H 0.8606 0.1902 0.5021 0.063 Uiso 1 1 calc R . . 
H13F H 0.9220 0.1106 0.5500 0.063 Uiso 1 1 calc R . . 
N14" N 0.81518(19) 0.1483(2) 0.57022(15) 0.0468(9) Uani 1 1 d D . . 
H14" H 0.7788(17) 0.1982(8) 0.5638(18) 0.055(13) Uiso 1 1 d D . . 
C15" C 0.7875(3) 0.1193(3) 0.5301(2) 0.0552(12) Uani 1 1 d . . . 
H15E H 0.8315 0.0735 0.5236 0.066 Uiso 1 1 calc R . . 
H15F H 0.7657 0.1607 0.4910 0.066 Uiso 1 1 calc R . . 
C16" C 0.7281(3) 0.0957(3) 0.55218(19) 0.0545(12) Uani 1 1 d . . . 
C17" C 0.7611(2) 0.0213(3) 0.60600(18) 0.0492(11) Uani 1 1 d . . . 
H17E H 0.7242 0.0022 0.6122 0.059 Uiso 1 1 calc R . . 
H17F H 0.8076 -0.0193 0.5968 0.059 Uiso 1 1 calc R . . 
N18" N 0.77992(19) 0.0310(2) 0.66248(15) 0.0447(8) Uani 1 1 d D . . 
H18" H 0.7372(14) 0.065(2) 0.673(2) 0.072(16) Uiso 1 1 d D . . 
C19" C 0.8088(2) -0.0434(3) 0.71149(18) 0.0442(10) Uani 1 1 d . . . 
H19E H 0.8604 -0.0805 0.7063 0.053 Uiso 1 1 calc R . . 
H19F H 0.7759 -0.0663 0.7098 0.053 Uiso 1 1 calc R . . 
C20" C 0.8114(2) -0.0324(2) 0.77184(18) 0.0396(9) Uani 1 1 d . . . 
C21" C 0.7601(2) -0.0398(2) 0.80932(18) 0.0432(10) Uani 1 1 d . . . 
H21C H 0.7216 -0.0478 0.7956 0.052 Uiso 1 1 calc R . . 
C22" C 0.7642(2) -0.0357(2) 0.86624(19) 0.0429(10) Uani 1 1 d . . . 
C23" C 0.8234(2) -0.0285(2) 0.88695(19) 0.0445(10) Uani 1 1 d . . . 
H23C H 0.8284 -0.0286 0.9268 0.053 Uiso 1 1 calc R . . 
O24" O 0.71536(16) -0.04010(18) 0.90601(13) 0.0531(8) Uani 1 1 d . . . 
C25" C 0.6584(3) -0.0552(3) 0.8889(2) 0.0660(14) Uani 1 1 d . . . 
H25G H 0.6274 -0.0567 0.9209 0.099 Uiso 1 1 calc R . . 
H25H H 0.6824 -0.1057 0.8814 0.099 Uiso 1 1 calc R . . 
H25I H 0.6263 -0.0137 0.8526 0.099 Uiso 1 1 calc R . . 
C26" C 0.8984(3) 0.2079(3) 0.8721(2) 0.0664(14) Uani 1 1 d . . . 
H26G H 0.8665 0.2092 0.8407 0.100 Uiso 1 1 calc R . . 
H26H H 0.8958 0.2589 0.8629 0.100 Uiso 1 1 calc R . . 
H26I H 0.8804 0.1961 0.9104 0.100 Uiso 1 1 calc R . . 
C27" C 1.0299(3) 0.1440(3) 0.9245(2) 0.0628(13) Uani 1 1 d . . . 
H27G H 1.0826 0.1039 0.9269 0.094 Uiso 1 1 calc R . . 
H27H H 1.0120 0.1323 0.9628 0.094 Uiso 1 1 calc R . . 
H27I H 1.0267 0.1954 0.9149 0.094 Uiso 1 1 calc R . . 
C28" C 0.9562(3) 0.2869(3) 0.6137(2) 0.0593(12) Uani 1 1 d . . . 
H28C H 0.9775 0.3130 0.6274 0.071 Uiso 1 1 calc R . . 
C29" C 0.9198(3) 0.3171(3) 0.5556(2) 0.0681(14) Uani 1 1 d D A . 
C30" C 0.8911(3) 0.2773(3) 0.5358(2) 0.0605(13) Uani 1 1 d . . . 
H30C H 0.8668 0.2977 0.4959 0.073 Uiso 1 1 calc R . . 
O31" O 0.9132(3) 0.3868(2) 0.51837(17) 0.0938(13) Uani 1 1 d D . . 
C32" C 0.8680(7) 0.4536(6) 0.5331(6) 0.111(4) Uani 0.530(9) 1 d PDU A 1 
H32G H 0.8674 0.4986 0.5037 0.166 Uiso 0.530(9) 1 calc PR A 1 
H32H H 0.8882 0.4478 0.5726 0.166 Uiso 0.530(9) 1 calc PR A 1 
H32I H 0.8163 0.4617 0.5336 0.166 Uiso 0.530(9) 1 calc PR A 1 
C32C C 0.8565(6) 0.4316(7) 0.4694(5) 0.095(4) Uiso 0.470(9) 1 d PDU A 2 
H32J H 0.8596 0.4785 0.4481 0.143 Uiso 0.470(9) 1 calc PR A 2 
H32K H 0.8069 0.4471 0.4829 0.143 Uiso 0.470(9) 1 calc PR A 2 
H32L H 0.8633 0.4008 0.4427 0.143 Uiso 0.470(9) 1 calc PR A 2 
C33" C 0.6587(3) 0.1638(3) 0.5659(2) 0.0702(15) Uani 1 1 d . . . 
H33G H 0.6747 0.1760 0.5985 0.105 Uiso 1 1 calc R . . 
H33H H 0.6203 0.1483 0.5775 0.105 Uiso 1 1 calc R . . 
H33I H 0.6373 0.2101 0.5303 0.105 Uiso 1 1 calc R . . 
C34" C 0.7024(3) 0.0778(3) 0.5006(2) 0.0684(14) Uani 1 1 d . . . 
H34G H 0.7459 0.0349 0.4915 0.103 Uiso 1 1 calc R . . 
H34H H 0.6810 0.1245 0.4654 0.103 Uiso 1 1 calc R . . 
H34I H 0.6638 0.0625 0.5121 0.103 Uiso 1 1 calc R . . 
O40" O 0.82358(15) 0.16971(18) 0.76129(13) 0.0514(8) Uani 1 1 d . . . 
C41" C 0.7658(2) 0.1877(3) 0.7290(2) 0.0563(12) Uani 1 1 d . . . 
O42" O 0.76420(15) 0.16425(17) 0.68621(13) 0.0524(8) Uani 1 1 d . . . 
C43" C 0.6905(3) 0.2430(4) 0.7442(3) 0.100(2) Uani 1 1 d . . . 
H43G H 0.6832 0.2176 0.7837 0.150 Uiso 1 1 calc R . . 
H43H H 0.6493 0.2564 0.7146 0.150 Uiso 1 1 calc R . . 
H43I H 0.6906 0.2908 0.7441 0.150 Uiso 1 1 calc R . . 
O45" O 1.05209(14) -0.01833(16) 0.77491(12) 0.0443(7) Uani 1 1 d . . . 
C46" C 1.1225(2) -0.0417(3) 0.79130(19) 0.0448(10) Uani 1 1 d . . . 
O47" O 1.14355(17) -0.00636(19) 0.81259(15) 0.0625(9) Uani 1 1 d . . . 
C48" C 1.1797(3) -0.1164(3) 0.7806(2) 0.0631(13) Uani 1 1 d . . . 
H48G H 1.2306 -0.1235 0.7870 0.095 Uiso 1 1 calc R . . 
H48H H 1.1686 -0.1135 0.7396 0.095 Uiso 1 1 calc R . . 
H48I H 1.1772 -0.1608 0.8083 0.095 Uiso 1 1 calc R . . 
O50" O 0.93132(16) -0.01632(17) 0.62497(13) 0.0497(7) Uani 1 1 d . . . 
C51" C 1.0005(3) -0.0577(3) 0.62663(19) 0.0473(11) Uani 1 1 d . . . 
O52" O 1.05020(16) -0.08413(17) 0.67149(13) 0.0503(7) Uani 1 1 d . . . 
C53" C 1.0322(3) -0.0797(3) 0.5728(2) 0.0581(12) Uani 1 1 d . . . 
H53G H 0.9908 -0.0662 0.5432 0.087 Uiso 1 1 calc R . . 
H53H H 1.0676 -0.1361 0.5846 0.087 Uiso 1 1 calc R . . 
H53I H 1.0589 -0.0511 0.5555 0.087 Uiso 1 1 calc R . . 
O55" O 1.05782(17) -0.18363(18) 0.80209(14) 0.0588(8) Uani 1 1 d . . . 
C56" C 1.0457(3) -0.2289(3) 0.7810(2) 0.0549(12) Uani 1 1 d . . . 
O57" O 0.99578(18) -0.20395(19) 0.73930(15) 0.0626(9) Uani 1 1 d . . . 
C58" C 1.0975(3) -0.3146(3) 0.8100(3) 0.0746(16) Uani 1 1 d . . . 
H58G H 1.0841 -0.3441 0.7910 0.112 Uiso 1 1 calc R . . 
H58H H 1.0925 -0.3288 0.8524 0.112 Uiso 1 1 calc R . . 
H58I H 1.1499 -0.3269 0.8056 0.112 Uiso 1 1 calc R . . 
  
loop_ 
 _atom_site_aniso_label 
 _atom_site_aniso_U_11 
 _atom_site_aniso_U_22 
 _atom_site_aniso_U_33 
 _atom_site_aniso_U_23 
 _atom_site_aniso_U_13 
 _atom_site_aniso_U_12 
Zn1 0.0317(3) 0.0505(4) 0.0479(3) -0.0259(3) 0.0057(2) -0.0136(3) 
Zn2 0.0318(3) 0.0461(3) 0.0451(3) -0.0220(3) 0.0039(2) -0.0131(3) 
Zn3 0.0377(3) 0.0493(3) 0.0522(3) -0.0256(3) 0.0077(3) -0.0196(3) 
O1 0.0285(13) 0.0460(17) 0.0421(15) -0.0192(13) 0.0016(12) -0.0148(13) 
C1 0.029(2) 0.034(2) 0.045(2) -0.0166(19) 0.0012(18) -0.0103(18) 
C2 0.028(2) 0.043(2) 0.048(2) -0.022(2) 0.0047(18) -0.0113(19) 
C3 0.034(2) 0.046(3) 0.044(2) -0.022(2) 0.0036(18) -0.013(2) 
N4 0.0342(18) 0.053(2) 0.049(2) -0.0261(18) 0.0108(16) -0.0203(18) 
C5 0.038(2) 0.070(3) 0.050(3) -0.030(2) 0.011(2) -0.024(2) 
C6 0.035(2) 0.074(3) 0.064(3) -0.045(3) 0.017(2) -0.024(2) 
C7 0.037(2) 0.069(3) 0.063(3) -0.037(3) 0.012(2) -0.020(2) 
N8 0.0337(18) 0.056(3) 0.056(2) -0.030(2) 0.0116(17) -0.0174(19) 
C9 0.029(2) 0.066(3) 0.065(3) -0.031(3) 0.000(2) -0.013(2) 
C10 0.032(2) 0.049(3) 0.055(3) -0.024(2) 0.000(2) -0.008(2) 
C11 0.031(2) 0.044(3) 0.056(3) -0.023(2) -0.002(2) -0.015(2) 
O11 0.0321(14) 0.0440(17) 0.0406(15) -0.0194(13) 0.0010(12) -0.0082(13) 
C12 0.033(2) 0.046(3) 0.051(3) -0.018(2) -0.004(2) -0.013(2) 
C13 0.037(2) 0.051(3) 0.048(3) -0.016(2) -0.0044(19) -0.015(2) 
N14 0.0395(19) 0.044(2) 0.046(2) -0.0196(18) 0.0012(16) -0.0139(18) 
C15 0.039(2) 0.059(3) 0.042(2) -0.018(2) 0.007(2) -0.016(2) 
C16 0.044(2) 0.062(3) 0.041(2) -0.019(2) 0.011(2) -0.024(2) 
C17 0.034(2) 0.061(3) 0.044(2) -0.027(2) 0.0079(19) -0.019(2) 
N18 0.0335(17) 0.045(2) 0.0400(19) -0.0219(17) 0.0057(15) -0.0176(17) 
C19 0.031(2) 0.045(3) 0.051(3) -0.023(2) 0.0076(19) -0.0143(19) 
C20 0.030(2) 0.038(2) 0.042(2) -0.0156(19) 0.0033(18) -0.0131(18) 
C21 0.028(2) 0.045(3) 0.054(3) -0.022(2) 0.0053(19) -0.0147(19) 
C22 0.035(2) 0.040(2) 0.043(2) -0.0145(19) -0.0047(18) -0.0162(19) 
C23 0.037(2) 0.040(2) 0.038(2) -0.0167(19) 0.0009(18) -0.0097(19) 
O24 0.0382(16) 0.071(2) 0.0506(18) -0.0241(16) 0.0016(14) -0.0261(16) 
C25 0.061(3) 0.131(5) 0.066(3) -0.043(3) 0.009(3) -0.062(4) 
C26 0.044(3) 0.073(3) 0.074(3) -0.045(3) 0.012(2) -0.025(3) 
C27 0.051(3) 0.090(4) 0.060(3) -0.041(3) 0.019(2) -0.029(3) 
C28 0.040(3) 0.056(3) 0.065(3) -0.026(3) 0.001(2) -0.009(2) 
C29 0.038(3) 0.051(3) 0.075(4) -0.019(3) -0.011(2) -0.007(2) 
C30 0.046(3) 0.063(3) 0.055(3) -0.016(2) -0.001(2) -0.023(2) 
O31 0.050(2) 0.052(2) 0.090(3) -0.0119(19) -0.0074(18) -0.0010(17) 
C32 0.065(4) 0.059(4) 0.110(5) -0.031(4) -0.014(3) 0.010(3) 
C33 0.056(3) 0.059(3) 0.064(3) -0.018(3) 0.008(2) -0.029(3) 
C34 0.052(3) 0.085(4) 0.055(3) -0.025(3) 0.014(2) -0.028(3) 
O40 0.0399(16) 0.0580(19) 0.0571(18) -0.0315(16) 0.0123(14) -0.0241(15) 
C41 0.043(3) 0.050(3) 0.073(3) -0.030(3) 0.006(2) -0.021(2) 
O42 0.0500(17) 0.0566(19) 0.0608(19) -0.0369(16) 0.0177(15) -0.0271(15) 
C43 0.140(6) 0.150(6) 0.126(5) -0.105(5) 0.074(5) -0.113(5) 
O45 0.0348(15) 0.0539(19) 0.0627(19) -0.0301(15) 0.0118(14) -0.0234(14) 
C46 0.038(2) 0.054(3) 0.046(3) -0.016(2) -0.002(2) -0.018(2) 
O47 0.0395(17) 0.075(2) 0.074(2) -0.0384(19) 0.0186(16) -0.0276(17) 
C48 0.061(3) 0.077(4) 0.113(5) -0.053(4) 0.034(3) -0.043(3) 
O50 0.0444(16) 0.0533(19) 0.0574(19) -0.0290(16) 0.0104(14) -0.0220(15) 
C51 0.033(2) 0.044(3) 0.057(3) -0.024(2) 0.002(2) -0.008(2) 
O52 0.0466(17) 0.061(2) 0.0538(19) -0.0291(16) 0.0052(15) -0.0266(16) 
C53 0.053(3) 0.060(3) 0.056(3) -0.029(2) -0.004(2) -0.018(2) 
O55 0.0552(19) 0.0512(19) 0.062(2) -0.0232(16) 0.0087(16) -0.0157(16) 
C56 0.039(3) 0.052(3) 0.071(3) -0.030(3) 0.001(2) -0.015(2) 
O57 0.0522(19) 0.063(2) 0.066(2) -0.0194(18) 0.0070(17) -0.0252(17) 
C58 0.062(3) 0.055(3) 0.103(4) -0.025(3) 0.015(3) -0.026(3) 
Zn1' 0.0499(3) 0.0364(3) 0.0445(3) -0.0176(3) -0.0012(3) -0.0113(3) 
Zn2' 0.0381(3) 0.0359(3) 0.0464(3) -0.0163(3) 0.0017(2) -0.0108(3) 
Zn3' 0.0404(3) 0.0495(4) 0.0627(4) -0.0210(3) -0.0003(3) -0.0129(3) 
O1' 0.0396(15) 0.0374(16) 0.0489(17) -0.0227(14) -0.0012(13) -0.0073(13) 
C1' 0.037(2) 0.038(2) 0.045(2) -0.019(2) -0.0029(19) -0.0083(19) 
C2' 0.058(3) 0.043(3) 0.048(3) -0.017(2) -0.012(2) -0.012(2) 
C3' 0.072(3) 0.036(3) 0.050(3) -0.021(2) -0.008(2) -0.006(2) 
N4' 0.065(3) 0.039(2) 0.041(2) -0.0187(17) -0.005(2) -0.010(2) 
C5' 0.070(3) 0.039(3) 0.041(2) -0.015(2) -0.005(2) -0.005(2) 
C6' 0.053(3) 0.039(3) 0.044(2) -0.015(2) 0.004(2) -0.010(2) 
C7' 0.047(2) 0.030(2) 0.041(2) -0.0170(19) 0.0000(19) -0.0078(19) 
N8' 0.0337(18) 0.040(2) 0.0410(19) -0.0200(16) 0.0047(16) -0.0115(16) 
C9' 0.032(2) 0.039(2) 0.046(2) -0.019(2) 0.0052(18) -0.0069(19) 
C10' 0.034(2) 0.042(3) 0.046(2) -0.021(2) 0.0085(19) -0.0110(19) 
C11' 0.039(2) 0.039(2) 0.042(2) -0.020(2) 0.0106(19) -0.014(2) 
O11' 0.0447(16) 0.0402(16) 0.0423(16) -0.0179(13) 0.0028(13) -0.0158(14) 
C12' 0.038(2) 0.039(2) 0.049(3) -0.021(2) 0.008(2) -0.010(2) 
C13' 0.057(3) 0.050(3) 0.046(3) -0.026(2) 0.014(2) -0.019(2) 
N14' 0.048(2) 0.037(2) 0.045(2) -0.0167(17) 0.0033(17) -0.0125(18) 
C15' 0.061(3) 0.037(3) 0.045(3) -0.014(2) -0.001(2) -0.009(2) 
C16' 0.055(3) 0.035(2) 0.048(3) -0.014(2) -0.003(2) -0.005(2) 
C17' 0.048(3) 0.033(2) 0.049(3) -0.012(2) 0.002(2) -0.008(2) 
N18' 0.0354(19) 0.035(2) 0.047(2) -0.0137(16) -0.0009(17) -0.0101(16) 
C19' 0.037(2) 0.036(2) 0.052(3) -0.018(2) 0.0032(19) -0.0121(19) 
C20' 0.039(2) 0.037(2) 0.049(2) -0.020(2) -0.0028(19) -0.015(2) 
C21' 0.043(2) 0.034(2) 0.052(3) -0.019(2) -0.006(2) -0.008(2) 
C22' 0.056(3) 0.045(3) 0.053(3) -0.027(2) -0.002(2) -0.010(2) 
C23' 0.069(3) 0.046(3) 0.042(3) -0.021(2) -0.006(2) -0.010(2) 
O24' 0.082(2) 0.0471(19) 0.0487(18) -0.0241(16) 0.0008(17) -0.0071(17) 
C25' 0.089(4) 0.051(3) 0.063(3) -0.031(3) 0.002(3) 0.000(3) 
C26' 0.072(3) 0.055(3) 0.059(3) -0.018(3) 0.018(3) -0.022(3) 
C27' 0.088(4) 0.044(3) 0.049(3) -0.009(2) 0.001(3) -0.016(3) 
C28' 0.049(3) 0.038(2) 0.046(3) -0.021(2) 0.009(2) -0.008(2) 
C29' 0.058(3) 0.043(3) 0.047(3) -0.023(2) 0.011(2) -0.017(2) 
C30' 0.053(3) 0.050(3) 0.041(2) -0.018(2) 0.004(2) -0.014(2) 
O31' 0.091(2) 0.047(2) 0.0487(19) -0.0243(16) -0.0060(17) -0.0149(18) 
C32' 0.117(5) 0.048(3) 0.068(3) -0.025(3) -0.011(3) -0.024(3) 
C33' 0.045(3) 0.052(3) 0.070(3) -0.025(3) -0.006(2) -0.010(2) 
C34' 0.073(3) 0.048(3) 0.051(3) -0.014(2) -0.012(3) -0.004(3) 
O40' 0.0409(17) 0.0480(19) 0.0556(19) -0.0047(15) 0.0018(15) -0.0122(15) 
C41' 0.051(3) 0.050(3) 0.050(3) -0.028(2) 0.009(2) -0.023(2) 
O42' 0.0386(16) 0.0412(18) 0.0604(19) -0.0114(16) 0.0014(14) -0.0134(14) 
C43' 0.056(3) 0.062(4) 0.107(5) -0.013(3) 0.010(3) -0.029(3) 
O45' 0.0349(16) 0.0442(18) 0.087(2) -0.0280(17) -0.0094(16) -0.0060(15) 
C46' 0.053(3) 0.046(3) 0.119(5) -0.029(3) -0.015(3) -0.013(3) 
O47' 0.055(2) 0.064(3) 0.180(5) -0.003(3) -0.022(3) -0.015(2) 
C48' 0.046(3) 0.085(5) 0.146(6) -0.039(4) 0.012(4) -0.014(3) 
O50' 0.0435(18) 0.0524(19) 0.066(2) -0.0228(16) 0.0107(15) -0.0201(15) 
C51' 0.057(3) 0.051(3) 0.068(3) -0.032(3) 0.012(3) -0.025(3) 
O52' 0.0488(19) 0.065(2) 0.065(2) -0.0238(18) 0.0036(17) -0.0195(17) 
C53' 0.065(3) 0.058(3) 0.057(3) -0.026(2) 0.016(2) -0.025(3) 
O55' 0.073(2) 0.053(2) 0.076(2) -0.0194(18) -0.0051(18) -0.0289(18) 
C56' 0.049(3) 0.058(3) 0.082(4) -0.031(3) 0.011(3) -0.023(3) 
O57' 0.062(2) 0.049(2) 0.098(3) -0.027(2) -0.015(2) -0.0089(18) 
C58' 0.059(3) 0.073(4) 0.138(6) -0.049(4) -0.002(3) -0.032(3) 
Zn1" 0.0462(3) 0.0517(4) 0.0459(3) -0.0251(3) 0.0098(3) -0.0262(3) 
Zn2" 0.0387(3) 0.0493(3) 0.0449(3) -0.0227(3) 0.0064(2) -0.0189(3) 
Zn3" 0.0352(3) 0.0509(4) 0.0498(3) -0.0255(3) 0.0076(2) -0.0186(3) 
O1" 0.0355(14) 0.0481(17) 0.0452(16) -0.0261(14) 0.0126(13) -0.0208(13) 
C1" 0.034(2) 0.031(2) 0.038(2) -0.0147(18) 0.0080(17) -0.0127(18) 
C2" 0.039(2) 0.038(2) 0.046(2) -0.0183(19) 0.0040(19) -0.0196(19) 
C3" 0.051(3) 0.054(3) 0.038(2) -0.018(2) 0.006(2) -0.027(2) 
N4" 0.042(2) 0.056(2) 0.050(2) -0.0284(19) 0.0082(17) -0.027(2) 
C5" 0.052(3) 0.069(3) 0.042(2) -0.029(2) 0.007(2) -0.037(2) 
C6" 0.044(2) 0.057(3) 0.055(3) -0.028(2) 0.006(2) -0.027(2) 
C7" 0.045(2) 0.053(3) 0.055(3) -0.025(2) 0.003(2) -0.024(2) 
N8" 0.0365(19) 0.047(2) 0.056(2) -0.0246(18) 0.0095(17) -0.0196(18) 
C9" 0.048(3) 0.052(3) 0.055(3) -0.016(2) 0.007(2) -0.028(2) 
C10" 0.048(3) 0.050(3) 0.055(3) -0.016(2) 0.008(2) -0.022(2) 
C11" 0.038(2) 0.037(2) 0.051(3) -0.016(2) 0.011(2) -0.015(2) 
O11" 0.0395(15) 0.0455(17) 0.0441(16) -0.0212(14) 0.0082(13) -0.0172(14) 
C12" 0.045(2) 0.052(3) 0.047(3) -0.021(2) 0.012(2) -0.025(2) 
C13" 0.048(3) 0.060(3) 0.049(3) -0.023(2) 0.011(2) -0.024(2) 
N14" 0.039(2) 0.051(2) 0.045(2) -0.0204(19) 0.0019(17) -0.0150(19) 
C15" 0.052(3) 0.071(3) 0.047(3) -0.023(2) 0.007(2) -0.031(3) 
C16" 0.055(3) 0.062(3) 0.045(3) -0.022(2) -0.001(2) -0.025(2) 
C17" 0.051(3) 0.060(3) 0.045(2) -0.027(2) 0.004(2) -0.028(2) 
N18" 0.038(2) 0.050(2) 0.043(2) -0.0224(18) 0.0037(17) -0.0157(18) 
C19" 0.040(2) 0.053(3) 0.049(3) -0.026(2) 0.010(2) -0.024(2) 
C20" 0.035(2) 0.043(2) 0.045(2) -0.021(2) 0.0066(19) -0.0184(19) 
C21" 0.035(2) 0.048(3) 0.053(3) -0.024(2) 0.007(2) -0.021(2) 
C22" 0.036(2) 0.050(3) 0.050(3) -0.024(2) 0.016(2) -0.022(2) 
C23" 0.045(2) 0.047(3) 0.048(2) -0.023(2) 0.010(2) -0.023(2) 
O24" 0.0512(17) 0.073(2) 0.0517(18) -0.0282(16) 0.0178(15) -0.0390(17) 
C25" 0.049(3) 0.104(4) 0.068(3) -0.035(3) 0.021(2) -0.052(3) 
C26" 0.060(3) 0.077(4) 0.078(4) -0.049(3) 0.017(3) -0.032(3) 
C27" 0.071(3) 0.086(4) 0.061(3) -0.044(3) 0.011(3) -0.050(3) 
C28" 0.066(3) 0.058(3) 0.062(3) -0.016(3) 0.009(3) -0.038(3) 
C29" 0.082(4) 0.057(3) 0.069(4) -0.013(3) 0.018(3) -0.041(3) 
C30" 0.052(3) 0.067(3) 0.054(3) -0.015(3) 0.006(2) -0.025(3) 
O31" 0.124(4) 0.077(3) 0.071(3) 0.003(2) 0.000(2) -0.057(3) 
C32" 0.124(8) 0.071(7) 0.116(8) -0.012(6) 0.017(6) -0.042(6) 
C33" 0.046(3) 0.080(4) 0.075(4) -0.032(3) 0.004(3) -0.020(3) 
C34" 0.075(3) 0.087(4) 0.050(3) -0.022(3) -0.007(3) -0.044(3) 
O40" 0.0403(16) 0.065(2) 0.0594(19) -0.0374(16) 0.0118(15) -0.0246(15) 
C41" 0.040(3) 0.065(3) 0.067(3) -0.033(3) 0.014(2) -0.022(2) 
O42" 0.0421(16) 0.060(2) 0.0566(18) -0.0352(16) 0.0049(14) -0.0169(15) 
C43" 0.048(3) 0.136(6) 0.137(6) -0.106(5) 0.023(3) -0.027(3) 
O45" 0.0341(15) 0.0463(17) 0.0570(18) -0.0240(14) 0.0055(13) -0.0189(13) 
C46" 0.040(2) 0.052(3) 0.047(3) -0.021(2) 0.012(2) -0.023(2) 
O47" 0.0482(18) 0.063(2) 0.085(2) -0.0380(19) 0.0039(17) -0.0262(17) 
C48" 0.047(3) 0.062(3) 0.083(4) -0.033(3) 0.001(3) -0.022(2) 
O50" 0.0397(17) 0.0509(18) 0.0590(19) -0.0304(15) 0.0077(14) -0.0154(15) 
C51" 0.060(3) 0.047(3) 0.045(3) -0.023(2) 0.012(2) -0.029(2) 
O52" 0.0453(17) 0.060(2) 0.0490(18) -0.0276(15) 0.0159(15) -0.0229(15) 
C53" 0.057(3) 0.063(3) 0.051(3) -0.029(2) 0.015(2) -0.022(3) 
O55" 0.062(2) 0.056(2) 0.064(2) -0.0251(17) 0.0049(16) -0.0302(17) 
C56" 0.045(3) 0.055(3) 0.070(3) -0.029(3) 0.021(3) -0.024(2) 
O57" 0.0547(19) 0.059(2) 0.075(2) -0.0259(18) 0.0008(18) -0.0260(17) 
C58" 0.050(3) 0.053(3) 0.117(5) -0.031(3) 0.007(3) -0.020(3) 
  
_geom_special_details 
; 
 All esds (except the esd in the dihedral angle between two l.s. planes) 
 are estimated using the full covariance matrix.  The cell esds are taken 
 into account individually in the estimation of esds in distances, angles 
 and torsion angles; correlations between esds in cell parameters are only 
 used when they are defined by crystal symmetry.  An approximate (isotropic) 
 treatment of cell esds is used for estimating esds involving l.s. planes. 
; 
  
loop_ 
 _geom_bond_atom_site_label_1 
 _geom_bond_atom_site_label_2 
 _geom_bond_distance 
 _geom_bond_site_symmetry_2 
 _geom_bond_publ_flag 
Zn1 O11 2.066(3) . ? 
Zn1 N8 2.092(3) . ? 
Zn1 N4 2.126(3) . ? 
Zn1 O40 2.133(3) . ? 
Zn1 O45 2.162(3) . ? 
Zn1 O1 2.284(2) . ? 
Zn2 O11 2.092(3) . ? 
Zn2 O42 2.100(3) . ? 
Zn2 N18 2.106(3) . ? 
Zn2 N14 2.106(4) . ? 
Zn2 O50 2.187(3) . ? 
Zn2 O1 2.245(3) . ? 
Zn3 O55 1.934(3) . ? 
Zn3 O52 1.936(3) . ? 
Zn3 O1 1.981(3) . ? 
Zn3 O45 2.035(3) . ? 
O1 C1 1.369(4) . ? 
C1 C20 1.372(5) . ? 
C1 C2 1.405(5) . ? 
C2 C23 1.383(5) . ? 
C2 C3 1.505(5) . ? 
C3 N4 1.485(5) . ? 
N4 C5 1.471(5) . ? 
C5 C6 1.546(6) . ? 
C6 C26 1.519(6) . ? 
C6 C7 1.527(6) . ? 
C6 C27 1.538(6) . ? 
C7 N8 1.472(6) . ? 
N8 C9 1.475(5) . ? 
C9 C10 1.507(6) . ? 
C10 C28 1.399(6) . ? 
C10 C11 1.417(5) . ? 
C11 O11 1.351(5) . ? 
C11 C12 1.415(6) . ? 
C12 C30 1.385(6) . ? 
C12 C13 1.502(6) . ? 
C13 N14 1.478(5) . ? 
N14 C15 1.487(5) . ? 
C15 C16 1.536(6) . ? 
C16 C17 1.526(6) . ? 
C16 C33 1.533(6) . ? 
C16 C34 1.548(6) . ? 
C17 N18 1.483(5) . ? 
N18 C19 1.470(5) . ? 
C19 C20 1.518(5) . ? 
C20 C21 1.412(5) . ? 
C21 C22 1.377(5) . ? 
C22 O24 1.378(4) . ? 
C22 C23 1.380(5) . ? 
O24 C25 1.399(5) . ? 
C28 C29 1.348(7) . ? 
C29 O31 1.387(5) . ? 
C29 C30 1.422(6) . ? 
O31 C32 1.424(6) . ? 
O40 C41 1.259(5) . ? 
C41 O42 1.243(5) . ? 
C41 C43 1.527(7) . ? 
O45 C46 1.293(5) . ? 
C46 O47 1.220(5) . ? 
C46 C48 1.502(6) . ? 
O50 C51 1.243(5) . ? 
C51 O52 1.277(5) . ? 
C51 C53 1.508(6) . ? 
O55 C56 1.298(5) . ? 
C56 O57 1.231(6) . ? 
C56 C58 1.511(7) . ? 
Zn1' O11' 2.057(3) . ? 
Zn1' N4' 2.074(4) . ? 
Zn1' N8' 2.076(3) . ? 
Zn1' O40' 2.095(3) . ? 
Zn1' O1' 2.267(3) . ? 
Zn1' O45' 2.281(3) . ? 
Zn2' O11' 2.087(3) . ? 
Zn2' N18' 2.100(3) . ? 
Zn2' N14' 2.106(3) . ? 
Zn2' O42' 2.106(3) . ? 
Zn2' O1' 2.183(3) . ? 
Zn2' O50' 2.207(3) . ? 
Zn3' O52' 1.929(3) . ? 
Zn3' O55' 1.932(3) . ? 
Zn3' O45' 2.003(3) . ? 
Zn3' O1' 2.010(3) . ? 
O1' C1' 1.370(4) . ? 
C1' C2' 1.396(6) . ? 
C1' C20' 1.400(5) . ? 
C2' C23' 1.393(6) . ? 
C2' C3' 1.514(6) . ? 
C3' N4' 1.489(6) . ? 
N4' C5' 1.483(5) . ? 
C5' C6' 1.537(6) . ? 
C6' C26' 1.519(6) . ? 
C6' C27' 1.538(6) . ? 
C6' C7' 1.538(5) . ? 
C7' N8' 1.474(5) . ? 
N8' C9' 1.478(5) . ? 
C9' C10' 1.504(5) . ? 
C10' C28' 1.407(5) . ? 
C10' C11' 1.407(6) . ? 
C11' O11' 1.360(4) . ? 
C11' C12' 1.406(6) . ? 
C12' C30' 1.382(6) . ? 
C12' C13' 1.496(6) . ? 
C13' N14' 1.483(5) . ? 
N14' C15' 1.480(5) . ? 
C15' C16' 1.533(6) . ? 
C16' C33' 1.533(7) . ? 
C16' C17' 1.538(6) . ? 
C16' C34' 1.547(6) . ? 
C17' N18' 1.476(5) . ? 
N18' C19' 1.483(5) . ? 
C19' C20' 1.498(6) . ? 
C20' C21' 1.388(5) . ? 
C21' C22' 1.368(6) . ? 
C22' C23' 1.379(6) . ? 
C22' O24' 1.391(5) . ? 
O24' C25' 1.426(5) . ? 
C28' C29' 1.374(6) . ? 
C29' O31' 1.379(5) . ? 
C29' C30' 1.383(6) . ? 
O31' C32' 1.432(6) . ? 
O40' C41' 1.249(5) . ? 
C41' O42' 1.246(5) . ? 
C41' C43' 1.524(6) . ? 
O45' C46' 1.276(6) . ? 
C46' O47' 1.247(7) . ? 
C46' C48' 1.517(8) . ? 
O50' C51' 1.247(5) . ? 
C51' O52' 1.281(5) . ? 
C51' C53' 1.504(7) . ? 
O55' C56' 1.290(6) . ? 
C56' O57' 1.222(6) . ? 
C56' C58' 1.515(7) . ? 
Zn1" O11" 2.066(3) . ? 
Zn1" N8" 2.073(3) . ? 
Zn1" O40" 2.100(3) . ? 
Zn1" N4" 2.123(4) . ? 
Zn1" O45" 2.279(3) . ? 
Zn1" O1" 2.284(3) . ? 
Zn2" N14" 2.098(4) . ? 
Zn2" O42" 2.100(3) . ? 
Zn2" O11" 2.102(3) . ? 
Zn2" N18" 2.115(4) . ? 
Zn2" O50" 2.189(3) . ? 
Zn2" O1" 2.228(3) . ? 
Zn3" O55" 1.919(3) . ? 
Zn3" O52" 1.940(3) . ? 
Zn3" O1" 1.975(2) . ? 
Zn3" O45" 2.001(3) . ? 
O1" C1" 1.375(4) . ? 
C1" C20" 1.394(5) . ? 
C1" C2" 1.399(5) . ? 
C2" C23" 1.391(5) . ? 
C2" C3" 1.499(5) . ? 
C3" N4" 1.472(5) . ? 
N4" C5" 1.476(5) . ? 
C5" C6" 1.521(6) . ? 
C6" C7" 1.523(6) . ? 
C6" C26" 1.528(6) . ? 
C6" C27" 1.537(6) . ? 
C7" N8" 1.484(5) . ? 
N8" C9" 1.485(5) . ? 
C9" C10" 1.507(6) . ? 
C10" C28" 1.387(6) . ? 
C10" C11" 1.410(6) . ? 
C11" O11" 1.357(5) . ? 
C11" C12" 1.399(6) . ? 
C12" C30" 1.407(6) . ? 
C12" C13" 1.487(6) . ? 
C13" N14" 1.477(5) . ? 
N14" C15" 1.494(5) . ? 
C15" C16" 1.532(6) . ? 
C16" C17" 1.530(6) . ? 
C16" C34" 1.536(6) . ? 
C16" C33" 1.552(6) . ? 
C17" N18" 1.489(5) . ? 
N18" C19" 1.474(5) . ? 
C19" C20" 1.514(5) . ? 
C20" C21" 1.391(5) . ? 
C21" C22" 1.381(5) . ? 
C22" O24" 1.372(5) . ? 
C22" C23" 1.390(6) . ? 
O24" C25" 1.422(5) . ? 
C28" C29" 1.392(7) . ? 
C29" C30" 1.380(7) . ? 
C29" O31" 1.392(6) . ? 
O31" C32" 1.379(8) . ? 
O31" C32C 1.392(8) . ? 
O40" C41" 1.246(5) . ? 
C41" O42" 1.246(5) . ? 
C41" C43" 1.522(6) . ? 
O45" C46" 1.296(5) . ? 
C46" O47" 1.215(5) . ? 
C46" C48" 1.508(6) . ? 
O50" C51" 1.240(5) . ? 
C51" O52" 1.275(5) . ? 
C51" C53" 1.507(6) . ? 
O55" C56" 1.288(5) . ? 
C56" O57" 1.230(5) . ? 
C56" C58" 1.495(7) . ? 
  
loop_ 
 _geom_angle_atom_site_label_1 
 _geom_angle_atom_site_label_2 
 _geom_angle_atom_site_label_3 
 _geom_angle 
 _geom_angle_site_symmetry_1 
 _geom_angle_site_symmetry_3 
 _geom_angle_publ_flag 
O11 Zn1 N8 96.33(12) . . ? 
O11 Zn1 N4 170.84(11) . . ? 
N8 Zn1 N4 91.41(13) . . ? 
O11 Zn1 O40 94.09(11) . . ? 
N8 Zn1 O40 86.30(13) . . ? 
N4 Zn1 O40 81.50(13) . . ? 
O11 Zn1 O45 91.11(11) . . ? 
N8 Zn1 O45 107.93(13) . . ? 
N4 Zn1 O45 91.16(13) . . ? 
O40 Zn1 O45 164.23(10) . . ? 
O11 Zn1 O1 80.68(9) . . ? 
N8 Zn1 O1 175.41(13) . . ? 
N4 Zn1 O1 91.29(11) . . ? 
O40 Zn1 O1 90.43(10) . . ? 
O45 Zn1 O1 75.73(10) . . ? 
O11 Zn2 O42 95.46(11) . . ? 
O11 Zn2 N18 172.08(12) . . ? 
O42 Zn2 N18 82.85(12) . . ? 
O11 Zn2 N14 94.10(12) . . ? 
O42 Zn2 N14 90.94(13) . . ? 
N18 Zn2 N14 93.66(13) . . ? 
O11 Zn2 O50 93.24(10) . . ? 
O42 Zn2 O50 171.10(11) . . ? 
N18 Zn2 O50 88.78(12) . . ? 
N14 Zn2 O50 86.58(12) . . ? 
O11 Zn2 O1 81.09(10) . . ? 
O42 Zn2 O1 94.52(11) . . ? 
N18 Zn2 O1 91.31(11) . . ? 
N14 Zn2 O1 173.03(12) . . ? 
O50 Zn2 O1 88.66(10) . . ? 
O55 Zn3 O52 114.45(13) . . ? 
O55 Zn3 O1 119.45(12) . . ? 
O52 Zn3 O1 120.87(12) . . ? 
O55 Zn3 O45 106.38(13) . . ? 
O52 Zn3 O45 101.33(12) . . ? 
O1 Zn3 O45 85.65(11) . . ? 
C1 O1 Zn3 124.0(2) . . ? 
C1 O1 Zn2 115.4(2) . . ? 
Zn3 O1 Zn2 110.05(11) . . ? 
C1 O1 Zn1 114.6(2) . . ? 
Zn3 O1 Zn1 97.49(10) . . ? 
Zn2 O1 Zn1 87.95(9) . . ? 
O1 C1 C20 120.3(3) . . ? 
O1 C1 C2 120.4(3) . . ? 
C20 C1 C2 119.3(3) . . ? 
C23 C2 C1 118.9(4) . . ? 
C23 C2 C3 119.7(4) . . ? 
C1 C2 C3 121.4(3) . . ? 
N4 C3 C2 109.1(3) . . ? 
C5 N4 C3 112.4(3) . . ? 
C5 N4 Zn1 116.6(3) . . ? 
C3 N4 Zn1 110.8(2) . . ? 
N4 C5 C6 112.6(4) . . ? 
C26 C6 C7 111.7(4) . . ? 
C26 C6 C27 108.1(4) . . ? 
C7 C6 C27 105.6(3) . . ? 
C26 C6 C5 112.5(3) . . ? 
C7 C6 C5 110.9(3) . . ? 
C27 C6 C5 107.6(4) . . ? 
N8 C7 C6 115.4(3) . . ? 
C7 N8 C9 109.4(3) . . ? 
C7 N8 Zn1 120.5(3) . . ? 
C9 N8 Zn1 106.2(2) . . ? 
N8 C9 C10 114.3(4) . . ? 
C28 C10 C11 120.7(4) . . ? 
C28 C10 C9 116.9(4) . . ? 
C11 C10 C9 122.0(4) . . ? 
O11 C11 C12 121.1(3) . . ? 
O11 C11 C10 121.5(4) . . ? 
C12 C11 C10 117.3(4) . . ? 
C11 O11 Zn1 122.0(2) . . ? 
C11 O11 Zn2 121.6(3) . . ? 
Zn1 O11 Zn2 98.29(10) . . ? 
C30 C12 C11 121.0(4) . . ? 
C30 C12 C13 117.4(4) . . ? 
C11 C12 C13 121.3(4) . . ? 
N14 C13 C12 113.7(3) . . ? 
C13 N14 C15 108.7(3) . . ? 
C13 N14 Zn2 108.4(3) . . ? 
C15 N14 Zn2 116.5(3) . . ? 
N14 C15 C16 115.0(3) . . ? 
C17 C16 C33 111.6(4) . . ? 
C17 C16 C15 112.3(4) . . ? 
C33 C16 C15 111.8(4) . . ? 
C17 C16 C34 106.1(4) . . ? 
C33 C16 C34 109.0(4) . . ? 
C15 C16 C34 105.7(3) . . ? 
N18 C17 C16 114.0(3) . . ? 
C19 N18 C17 110.3(3) . . ? 
C19 N18 Zn2 111.4(2) . . ? 
C17 N18 Zn2 116.3(2) . . ? 
N18 C19 C20 111.8(3) . . ? 
C1 C20 C21 120.0(4) . . ? 
C1 C20 C19 120.7(3) . . ? 
C21 C20 C19 119.3(3) . . ? 
C22 C21 C20 119.9(4) . . ? 
C21 C22 O24 125.3(4) . . ? 
C21 C22 C23 119.3(3) . . ? 
O24 C22 C23 115.4(3) . . ? 
C22 C23 C2 121.4(4) . . ? 
C22 O24 C25 118.4(3) . . ? 
C29 C28 C10 121.1(4) . . ? 
C28 C29 O31 125.6(4) . . ? 
C28 C29 C30 119.9(4) . . ? 
O31 C29 C30 114.4(5) . . ? 
C12 C30 C29 119.7(4) . . ? 
C29 O31 C32 115.5(4) . . ? 
C41 O40 Zn1 130.8(3) . . ? 
O42 C41 O40 125.7(4) . . ? 
O42 C41 C43 117.6(4) . . ? 
O40 C41 C43 116.7(4) . . ? 
C41 O42 Zn2 127.7(3) . . ? 
C46 O45 Zn3 126.5(3) . . ? 
C46 O45 Zn1 133.6(3) . . ? 
Zn3 O45 Zn1 99.87(11) . . ? 
O47 C46 O45 123.5(4) . . ? 
O47 C46 C48 120.1(4) . . ? 
O45 C46 C48 116.3(4) . . ? 
C51 O50 Zn2 139.8(3) . . ? 
O50 C51 O52 125.1(4) . . ? 
O50 C51 C53 119.1(4) . . ? 
O52 C51 C53 115.8(4) . . ? 
C51 O52 Zn3 117.8(3) . . ? 
C56 O55 Zn3 106.0(3) . . ? 
O57 C56 O55 122.7(5) . . ? 
O57 C56 C58 122.1(4) . . ? 
O55 C56 C58 115.2(5) . . ? 
O11' Zn1' N4' 167.46(13) . . ? 
O11' Zn1' N8' 94.95(12) . . ? 
N4' Zn1' N8' 97.59(14) . . ? 
O11' Zn1' O40' 95.66(11) . . ? 
N4' Zn1' O40' 84.37(15) . . ? 
N8' Zn1' O40' 91.65(13) . . ? 
O11' Zn1' O1' 76.34(10) . . ? 
N4' Zn1' O1' 91.20(12) . . ? 
N8' Zn1' O1' 168.34(12) . . ? 
O40' Zn1' O1' 96.85(11) . . ? 
O11' Zn1' O45' 86.33(11) . . ? 
N4' Zn1' O45' 91.98(15) . . ? 
N8' Zn1' O45' 96.00(12) . . ? 
O40' Zn1' O45' 171.91(11) . . ? 
O1' Zn1' O45' 75.96(10) . . ? 
O11' Zn2' N18' 169.52(12) . . ? 
O11' Zn2' N14' 94.17(12) . . ? 
N18' Zn2' N14' 96.31(13) . . ? 
O11' Zn2' O42' 95.16(11) . . ? 
N18' Zn2' O42' 85.53(13) . . ? 
N14' Zn2' O42' 85.25(14) . . ? 
O11' Zn2' O1' 77.60(10) . . ? 
N18' Zn2' O1' 91.94(11) . . ? 
N14' Zn2' O1' 171.26(11) . . ? 
O42' Zn2' O1' 98.30(11) . . ? 
O11' Zn2' O50' 93.76(11) . . ? 
N18' Zn2' O50' 87.09(13) . . ? 
N14' Zn2' O50' 86.53(14) . . ? 
O42' Zn2' O50' 168.27(11) . . ? 
O1' Zn2' O50' 91.03(11) . . ? 
O52' Zn3' O55' 111.40(15) . . ? 
O52' Zn3' O45' 108.00(14) . . ? 
O55' Zn3' O45' 100.66(13) . . ? 
O52' Zn3' O1' 121.44(12) . . ? 
O55' Zn3' O1' 120.21(13) . . ? 
O45' Zn3' O1' 88.46(12) . . ? 
C1' O1' Zn3' 120.4(2) . . ? 
C1' O1' Zn2' 119.0(2) . . ? 
Zn3' O1' Zn2' 106.43(12) . . ? 
C1' O1' Zn1' 119.2(2) . . ? 
Zn3' O1' Zn1' 96.14(10) . . ? 
Zn2' O1' Zn1' 89.63(9) . . ? 
O1' C1' C2' 120.3(4) . . ? 
O1' C1' C20' 120.5(4) . . ? 
C2' C1' C20' 119.2(4) . . ? 
C23' C2' C1' 119.1(4) . . ? 
C23' C2' C3' 117.9(4) . . ? 
C1' C2' C3' 123.0(4) . . ? 
N4' C3' C2' 112.8(4) . . ? 
C5' N4' C3' 108.8(3) . . ? 
C5' N4' Zn1' 117.2(3) . . ? 
C3' N4' Zn1' 112.4(3) . . ? 
N4' C5' C6' 115.1(4) . . ? 
C26' C6' C5' 112.9(4) . . ? 
C26' C6' C27' 109.2(4) . . ? 
C5' C6' C27' 105.4(4) . . ? 
C26' C6' C7' 111.5(4) . . ? 
C5' C6' C7' 111.1(4) . . ? 
C27' C6' C7' 106.3(3) . . ? 
N8' C7' C6' 114.6(3) . . ? 
C7' N8' C9' 110.3(3) . . ? 
C7' N8' Zn1' 117.1(2) . . ? 
C9' N8' Zn1' 106.9(2) . . ? 
N8' C9' C10' 112.8(3) . . ? 
C28' C10' C11' 120.0(4) . . ? 
C28' C10' C9' 117.3(4) . . ? 
C11' C10' C9' 122.7(4) . . ? 
O11' C11' C12' 120.9(3) . . ? 
O11' C11' C10' 120.5(4) . . ? 
C12' C11' C10' 118.6(4) . . ? 
C11' O11' Zn1' 122.5(2) . . ? 
C11' O11' Zn2' 125.4(2) . . ? 
Zn1' O11' Zn2' 98.38(11) . . ? 
C30' C12' C11' 119.8(4) . . ? 
C30' C12' C13' 116.0(4) . . ? 
C11' C12' C13' 123.5(4) . . ? 
N14' C13' C12' 116.5(4) . . ? 
C15' N14' C13' 109.6(3) . . ? 
C15' N14' Zn2' 116.8(3) . . ? 
C13' N14' Zn2' 108.8(3) . . ? 
N14' C15' C16' 115.9(4) . . ? 
C15' C16' C33' 111.6(4) . . ? 
C15' C16' C17' 111.0(4) . . ? 
C33' C16' C17' 112.4(4) . . ? 
C15' C16' C34' 105.5(4) . . ? 
C33' C16' C34' 109.6(4) . . ? 
C17' C16' C34' 106.4(4) . . ? 
N18' C17' C16' 115.0(4) . . ? 
C17' N18' C19' 109.2(3) . . ? 
C17' N18' Zn2' 114.7(2) . . ? 
C19' N18' Zn2' 109.1(2) . . ? 
N18' C19' C20' 112.4(3) . . ? 
C21' C20' C1' 120.0(4) . . ? 
C21' C20' C19' 119.1(4) . . ? 
C1' C20' C19' 120.9(4) . . ? 
C22' C21' C20' 120.7(4) . . ? 
C21' C22' C23' 119.6(4) . . ? 
C21' C22' O24' 125.6(4) . . ? 
C23' C22' O24' 114.7(4) . . ? 
C22' C23' C2' 121.2(4) . . ? 
C22' O24' C25' 116.3(4) . . ? 
C29' C28' C10' 120.4(4) . . ? 
C28' C29' O31' 124.7(4) . . ? 
C28' C29' C30' 119.5(4) . . ? 
O31' C29' C30' 115.8(4) . . ? 
C12' C30' C29' 121.6(4) . . ? 
C29' O31' C32' 116.1(4) . . ? 
C41' O40' Zn1' 130.1(3) . . ? 
O42' C41' O40' 125.6(4) . . ? 
O42' C41' C43' 117.2(4) . . ? 
O40' C41' C43' 117.1(4) . . ? 
C41' O42' Zn2' 129.4(3) . . ? 
C46' O45' Zn3' 123.6(3) . . ? 
C46' O45' Zn1' 140.4(3) . . ? 
Zn3' O45' Zn1' 95.89(11) . . ? 
O47' C46' O45' 122.0(6) . . ? 
O47' C46' C48' 121.7(5) . . ? 
O45' C46' C48' 116.2(6) . . ? 
C51' O50' Zn2' 133.8(3) . . ? 
O50' C51' O52' 124.2(5) . . ? 
O50' C51' C53' 119.8(5) . . ? 
O52' C51' C53' 115.9(4) . . ? 
C51' O52' Zn3' 117.7(3) . . ? 
C56' O55' Zn3' 109.1(3) . . ? 
O57' C56' O55' 122.5(5) . . ? 
O57' C56' C58' 121.5(5) . . ? 
O55' C56' C58' 116.0(5) . . ? 
O11" Zn1" N8" 96.04(13) . . ? 
O11" Zn1" O40" 96.82(11) . . ? 
N8" Zn1" O40" 91.42(12) . . ? 
O11" Zn1" N4" 169.84(12) . . ? 
N8" Zn1" N4" 94.09(14) . . ? 
O40" Zn1" N4" 82.09(13) . . ? 
O11" Zn1" O45" 89.63(10) . . ? 
N8" Zn1" O45" 103.49(12) . . ? 
O40" Zn1" O45" 163.07(11) . . ? 
N4" Zn1" O45" 88.80(12) . . ? 
O11" Zn1" O1" 79.12(10) . . ? 
N8" Zn1" O1" 174.68(12) . . ? 
O40" Zn1" O1" 91.36(10) . . ? 
N4" Zn1" O1" 90.79(12) . . ? 
O45" Zn1" O1" 74.46(9) . . ? 
N14" Zn2" O42" 90.02(12) . . ? 
N14" Zn2" O11" 94.01(13) . . ? 
O42" Zn2" O11" 95.76(11) . . ? 
N14" Zn2" N18" 94.92(14) . . ? 
O42" Zn2" N18" 83.75(12) . . ? 
O11" Zn2" N18" 171.05(12) . . ? 
N14" Zn2" O50" 86.54(12) . . ? 
O42" Zn2" O50" 169.47(11) . . ? 
O11" Zn2" O50" 94.40(10) . . ? 
N18" Zn2" O50" 86.63(12) . . ? 
N14" Zn2" O1" 172.32(12) . . ? 
O42" Zn2" O1" 94.92(10) . . ? 
O11" Zn2" O1" 79.66(10) . . ? 
N18" Zn2" O1" 91.47(12) . . ? 
O50" Zn2" O1" 89.59(10) . . ? 
O55" Zn3" O52" 108.87(13) . . ? 
O55" Zn3" O1" 120.00(12) . . ? 
O52" Zn3" O1" 121.35(12) . . ? 
O55" Zn3" O45" 109.80(12) . . ? 
O52" Zn3" O45" 104.88(12) . . ? 
O1" Zn3" O45" 87.92(10) . . ? 
C1" O1" Zn3" 121.9(2) . . ? 
C1" O1" Zn2" 117.2(2) . . ? 
Zn3" O1" Zn2" 108.43(11) . . ? 
C1" O1" Zn1" 116.5(2) . . ? 
Zn3" O1" Zn1" 97.84(10) . . ? 
Zn2" O1" Zn1" 88.50(10) . . ? 
O1" C1" C20" 120.1(3) . . ? 
O1" C1" C2" 120.6(3) . . ? 
C20" C1" C2" 119.3(4) . . ? 
C23" C2" C1" 119.4(4) . . ? 
C23" C2" C3" 119.0(4) . . ? 
C1" C2" C3" 121.5(4) . . ? 
N4" C3" C2" 112.3(3) . . ? 
C3" N4" C5" 112.0(3) . . ? 
C3" N4" Zn1" 111.7(2) . . ? 
C5" N4" Zn1" 116.9(3) . . ? 
N4" C5" C6" 114.3(4) . . ? 
C5" C6" C7" 111.4(3) . . ? 
C5" C6" C26" 112.0(4) . . ? 
C7" C6" C26" 111.2(4) . . ? 
C5" C6" C27" 107.0(4) . . ? 
C7" C6" C27" 105.9(4) . . ? 
C26" C6" C27" 109.0(4) . . ? 
N8" C7" C6" 115.8(3) . . ? 
C7" N8" C9" 110.0(3) . . ? 
C7" N8" Zn1" 118.3(3) . . ? 
C9" N8" Zn1" 107.1(3) . . ? 
N8" C9" C10" 114.4(4) . . ? 
C28" C10" C11" 121.5(4) . . ? 
C28" C10" C9" 116.5(4) . . ? 
C11" C10" C9" 121.8(4) . . ? 
O11" C11" C12" 120.3(4) . . ? 
O11" C11" C10" 121.4(4) . . ? 
C12" C11" C10" 118.2(4) . . ? 
C11" O11" Zn1" 121.8(2) . . ? 
C11" O11" Zn2" 122.6(2) . . ? 
Zn1" O11" Zn2" 98.13(12) . . ? 
C11" C12" C30" 119.5(4) . . ? 
C11" C12" C13" 123.1(4) . . ? 
C30" C12" C13" 117.1(4) . . ? 
N14" C13" C12" 114.1(3) . . ? 
C13" N14" C15" 109.0(3) . . ? 
C13" N14" Zn2" 108.4(3) . . ? 
C15" N14" Zn2" 116.9(3) . . ? 
N14" C15" C16" 115.7(3) . . ? 
C17" C16" C15" 112.5(4) . . ? 
C17" C16" C34" 107.6(4) . . ? 
C15" C16" C34" 105.6(4) . . ? 
C17" C16" C33" 110.9(4) . . ? 
C15" C16" C33" 111.1(4) . . ? 
C34" C16" C33" 108.9(4) . . ? 
N18" C17" C16" 114.8(4) . . ? 
C19" N18" C17" 110.1(3) . . ? 
C19" N18" Zn2" 110.6(2) . . ? 
C17" N18" Zn2" 115.8(3) . . ? 
N18" C19" C20" 112.1(3) . . ? 
C21" C20" C1" 119.8(4) . . ? 
C21" C20" C19" 119.5(3) . . ? 
C1" C20" C19" 120.7(3) . . ? 
C22" C21" C20" 121.0(4) . . ? 
O24" C22" C21" 125.5(4) . . ? 
O24" C22" C23" 115.6(4) . . ? 
C21" C22" C23" 118.9(4) . . ? 
C22" C23" C2" 121.1(4) . . ? 
C22" O24" C25" 117.5(3) . . ? 
C10" C28" C29" 119.8(5) . . ? 
C30" C29" O31" 121.2(5) . . ? 
C30" C29" C28" 119.5(5) . . ? 
O31" C29" C28" 119.3(5) . . ? 
C29" C30" C12" 121.4(5) . . ? 
C32" O31" C29" 116.9(6) . . ? 
C32" O31" C32C 77.9(8) . . ? 
C29" O31" C32C 119.8(7) . . ? 
C41" O40" Zn1" 130.5(3) . . ? 
O42" C41" O40" 126.3(4) . . ? 
O42" C41" C43" 117.7(4) . . ? 
O40" C41" C43" 116.0(4) . . ? 
C41" O42" Zn2" 128.4(3) . . ? 
C46" O45" Zn3" 125.5(3) . . ? 
C46" O45" Zn1" 137.2(3) . . ? 
Zn3" O45" Zn1" 97.22(10) . . ? 
O47" C46" O45" 124.0(4) . . ? 
O47" C46" C48" 120.0(4) . . ? 
O45" C46" C48" 115.9(4) . . ? 
C51" O50" Zn2" 138.6(3) . . ? 
O50" C51" O52" 125.1(4) . . ? 
O50" C51" C53" 120.5(4) . . ? 
O52" C51" C53" 114.4(4) . . ? 
C51" O52" Zn3" 116.8(3) . . ? 
C56" O55" Zn3" 111.9(3) . . ? 
O57" C56" O55" 122.7(5) . . ? 
O57" C56" C58" 121.9(5) . . ? 
O55" C56" C58" 115.4(5) . . ? 
  
_diffrn_measured_fraction_theta_max    0.945 
_diffrn_reflns_theta_full              58.00 
_diffrn_measured_fraction_theta_full   0.979 
_refine_diff_density_max    0.579 
_refine_diff_density_min   -0.467 
_refine_diff_density_rms    0.065 
  
# SQUEEZE RESULTS (APPEND TO CIF)
# Note: Data are Listed for all Voids in the P1 Unit Cell
# i.e. Centre of Gravity, Solvent Accessible Volume,
# Recovered number of Electrons in the Void and
# Details about the Squeezed Material
loop_
  _platon_squeeze_void_nr
  _platon_squeeze_void_average_x
  _platon_squeeze_void_average_y
  _platon_squeeze_void_average_z
  _platon_squeeze_void_volume
  _platon_squeeze_void_count_electrons
  _platon_squeeze_void_content
   1  0.500  0.500  1.017      2744       537 ' '
_platon_squeeze_details
;
 Solvent handled using SQUEEZE which suggested 537 e/cell
 thf = C4H8O = 40e. 13.5thf = 540.
 Solvent assigned as 2.25 per complex (13.5 in cell)
;

#===END
